# Supplementary material for: An oxygen-bridged bimetallic [Cu–O–Se] catalyst for Sonogashira cross-coupling
Source: Royal Society of Chemistry journal article supplement (doi:10.1039/d1nj04485k), 2021-12-10

## Oxygen Bridged Bimetallic [Cu-O-Se] Catalyst for Sonogashira Cross-Coupling.

Santosh Kumar Sahu,<sup>a</sup> Prabhupada Choudhury,<sup>a</sup> Pradyota Kumar Behera,<sup>a</sup> Tanmayee Bisoyi,<sup>a</sup> Rashmi Ranjan Sahu,<sup>a</sup> Abinash Bisoyi,<sup>a</sup> Koteswara Rao Gorantla,<sup>b</sup> Bhabani S. Mallik,<sup>b</sup> Manoj Mohapatra,<sup>c</sup> Laxmidhar Rout,<sup>\*a#</sup>

<sup>a</sup>Department of Chemistry, Berhampur University, Odisha-760007, India, <sup>#</sup>Adjunct faculty, School of Chemical science, IISER Berhampur, Odisha-760010, India; <sup>b</sup>Department of Chemistry, IIT Hyderabad, Sangareddy, Medak-502285, Telangana, India, <sup>c</sup>Homi Bhaba National Institute, Anushakti Nagar, Mumbai-400094, Bhaba Atomic Research Centre, Bombay-400085.

### Table of Content

| Sl. | Details                                                             | Page     |
|-----|---------------------------------------------------------------------|----------|
|     | Table of content                                                    | S1       |
| 1   | Materials                                                           | S2       |
| 2   | Instrumentation                                                     | S2       |
| 3   | General procedure for Sonogashira cross-coupling:                   | S3       |
| 4   | Standardisation tables for solvent, base, catalyst and temperature  | S3-S5    |
| 5   | Characterization of product                                         | S6-S20   |
| 6   | EDX, SEM and Powdered XRD of CuSeO <sub>3</sub> . 2H <sub>2</sub> O | S21-23   |
| 7   | ICP-OES / AES study                                                 | S24-S25  |
| 8   | Mechanism study by computational DFT study                          | S25-S28  |
| 9   | Cartesian Co-ordinates used for DFT Study                           | S28-S44  |
| 10  | <sup>1</sup> H (proton) and <sup>13</sup> C (carbon) NMR spectra    | S45-S117 |

## 1. Materials:

Solvents such as acetonitrile (99.8%), 1,4-dioxane (99.8%), DMSO (99.9%), toluene (99.8%), DMF (99.8%), t-BuOH (99.5%) and deuteriated NMR solvents  $\text{CDCl}_3$  (99.8%)  $\text{CD}_3\text{CN}$  (99.8%) is purchased from Sigma-Aldrich. All other solvents is purchased from Merck of high purity grade. Toluene and acetonitrile was sparged with nitrogen ( $\text{N}_2$ ) for 5 min at room temperature and stored under nitrogen atmosphere.  $\text{Cs}_2\text{CO}_3$  (*ReagentPlus*®, 99%) and KOH (99%),  $\text{K}_2\text{CO}_3$  (99%),  $\text{KO}^t\text{Bu}$ (99%) was purchased from Sigma-Aldrich. All phenyl acetylenes were purchased from Sigma and used directly as received.  $\text{CuSeO}_3 \cdot 2\text{H}_2\text{O}$  was purchased from Sigma-Aldrich as well as synthesized in laboratory. Organic solutions were concentrated under reduced pressure on a Büchi rotary evaporator using a water bath. ICP standard  $\text{Pd}(\text{NO}_3)_2$  in  $\text{HNO}_3$  from Merck was purchased and used for control experiment.

## 2. Instrumentation:

NMR spectra were recorded on Bruker Avance III, 400 MHz (IISER Berhampur) and 500 MHz (University of Hyderabad) spectrometers in appropriate solvents  $\text{CDCl}_3$  using TMS as internal standard or the solvent signals as secondary standards and the chemical shifts are shown in  $\delta$  scales. The  $^1\text{H}$  and  $^{13}\text{C}$  NMR spectra were recorded at 400 MHz for  $^1\text{H}$  and 100 MHz for  $^{13}\text{C}$  NMR, respectively. Deuterated solvents were purchased from Sigma-aldrich and used as received. All  $^1\text{H}$  NMR experiments are reported in  $\delta$  units, parts per million (ppm), and were measured relative to the signals for residual chloroform (7.26 ppm) in the deuterated solvents. Data for  $^1\text{H}$  NMR are reported as follows: chemical shift ( $\delta$  ppm), multiplicity (s = singlet, d = doublet, t = triplet, q = quartet, p = quintet, m = multiplet, dd = doublet of doublets, dt = doublet of triplets...etc, br = broad), coupling constant (Hz) and integration. All  $^{13}\text{C}$  NMR spectra are reported in ppm relative to  $\text{CDCl}_3$  (77.0 ppm). 1,4-di iodobenzene was used as an internal standard for NMR yields from proton analysis. Elemental analysis is performed in 2400 Series II CHNS/O analyzer in CHNS mode. Flash column chromatography was performed by using a 90-120 times weight excess of flash silica gel 60-120  $\mu\text{m}$  from Aldrich. Fractions were analyzed by TLC using TLC silica gel F254 250  $\mu\text{m}$  precoated-plates from Merck and stains (permanganate, 2,4-dnp and CAM) was used for UV-inactive compounds. Melting point is determined in Digital melting point apparatus, Electronics India (EI)-2935 model; Visualized through LCD Screen and is uncorrected by  $\pm 5$  °C. Internal Standard. XPS is with Al-K $\alpha$  line at IIT Roorke. HRMS is done at University of Hyderabad and IISER Berhampur in ESI mode. ICP-AES (Inductively Coupled Plasma- Atomic Emission Spectrometry) analysis was carried out at Bhabha Atomic Research Centre (BARC), Trombay, with a Spectro-Arcos SOP unit, Germany. The spectrometer is augmented with a CCD detector array which was used for the analyses. High purity argon plasma was used as the plasma gas, carrier gas and auxiliary gas as well. All the calculations were performed by using Gaussian 09<sup>1</sup>. All the structure were optimized at meta-GGA M06L<sup>2</sup>-level, with Lan12dz<sup>3</sup> basis set. Effective core potentials were applied for copper, selenium, iodine and potassium atoms. Extra d orbitals were included in the basis set for the selenium and iodine atoms.

### 3. General Procedure for Sonogashira cross-coupling:

A oven dried 10 mL of two necked round bottom flask (one end with teflon cork and another end connected to N<sub>2</sub> atmosphere) was back filled with nitrogen three times. Then the flask was charged with 5 mol% CuSeO<sub>3</sub>.2H<sub>2</sub>O (11 mg), halobenzene (0.5 mmol), aryl/alkyl/alkynol/ acetylene (0.6 mmol), KOH (112 mg, 2 eq.) and 1 mL DMF. Then back filled with nitrogen (N<sub>2</sub>) for 5 min and placed into an oil bath at temperature 90 °C. The reaction is monitored after every 2 h and up to 48 h with the help of TLC using KMnO<sub>4</sub> stain. After the time specified in the schemes, the reaction mixture was cooled, brine solution was added, work up with ethyl acetate and cold water, finally concentrated in rotor. Then the crude mixture was directly subjected to column for flash column chromatography with 230-400 mesh silica Gel using ethylacetate and hexane as effluent to afford corresponding product. All yields are reported after column chromatography. The products were identified and cited with reported literature.

### 4. Standardization of reaction

#### a) Table 1. Standardization of Solvent

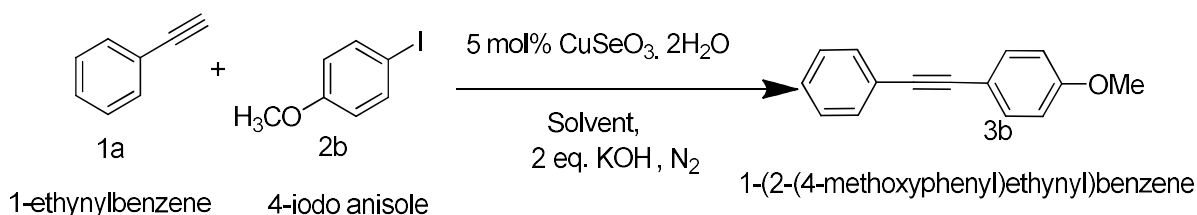

| Entry | Solvent            | (° C)           | Yield (%) <sup>a,b</sup> |
|-------|--------------------|-----------------|--------------------------|
| 1     | DMSO               | 90              | 5                        |
| 2     | CH <sub>3</sub> CN | 80 <sup>d</sup> | 0                        |
| 3     | 1,4-dioxane        | 90              | 0                        |
| 4     | <b>DMF</b>         | <b>90</b>       | <b>80</b>                |
| 5     | t-BuOH             | 80 <sup>d</sup> | 0                        |
| 6     | Toluene            | 90              | 0                        |
| 7     | THF                | 70              | 0                        |
| 8     | EtOH               | 80              | 0                        |

<sup>a</sup>Phenyl acetylene (1.2 mmol), <sup>b</sup>4-iodoanisole (1 mmol), <sup>c</sup>CuSeO<sub>3</sub>.2H<sub>2</sub>O catalyst (5 mol%, 11 mg), base 2 equiv. were stirred for 40h, <sup>d</sup>Refluxed using water condenser under respective boiling point.

**b) Table 2. Standardization of Base**

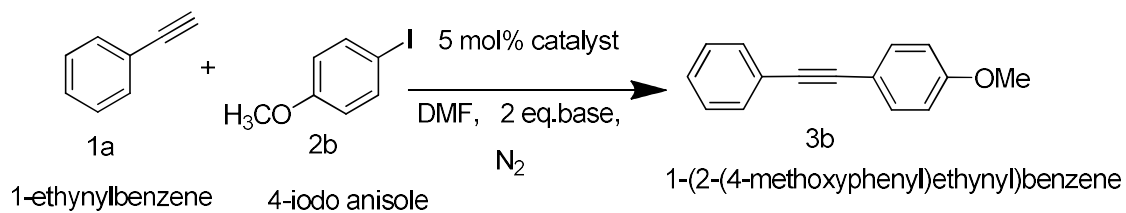

| Catalyst                                  | Base                            | Yield (%) <sup>a,b</sup> |
|-------------------------------------------|---------------------------------|--------------------------|
| <b>CuSeO<sub>3</sub>. 2H<sub>2</sub>O</b> | <b>KOH</b>                      | <b>80</b>                |
| CuSeO <sub>3</sub> . 2H <sub>2</sub> O    | K <sub>2</sub> CO <sub>3</sub>  | 0                        |
| CuSeO <sub>3</sub> . 2H <sub>2</sub> O    | KOAc                            | 30                       |
| CuSeO <sub>3</sub> . 2H <sub>2</sub> O    | NaOH                            | 0                        |
| CuSeO <sub>3</sub> . 2H <sub>2</sub> O    | Na <sub>2</sub> CO <sub>3</sub> | 0                        |
| CuSeO <sub>3</sub> . 2H <sub>2</sub> O    | Cs <sub>2</sub> CO <sub>3</sub> | 0                        |
| CuSeO <sub>3</sub> . 2H <sub>2</sub> O    | Pyridine                        | 12                       |
| CuSeO <sub>3</sub> . 2H <sub>2</sub> O    | Et <sub>3</sub> N               | 0                        |
| CuSeO <sub>3</sub> . 2H <sub>2</sub> O    | K <sub>3</sub> PO <sub>4</sub>  | 0                        |
| CuSeO <sub>3</sub> . 2H <sub>2</sub> O    | t-BuOK                          | 70                       |
| CuSeO <sub>3</sub> . 2H <sub>2</sub> O    | -                               | 0 <sup>c</sup>           |

<sup>a</sup>Phenyl acetylene (1.2 mmol), <sup>b</sup>4-iodoanisole (1 mmol), <sup>c</sup>CuSeO<sub>3</sub>.2H<sub>2</sub>O catalyst (5 mol%, 11 mg), base 2 equiv. were stirred for 40h, <sup>d</sup>Refluxed using water condenser under respective boiling point.

**c) Table 3. Standardization of Catalyst**

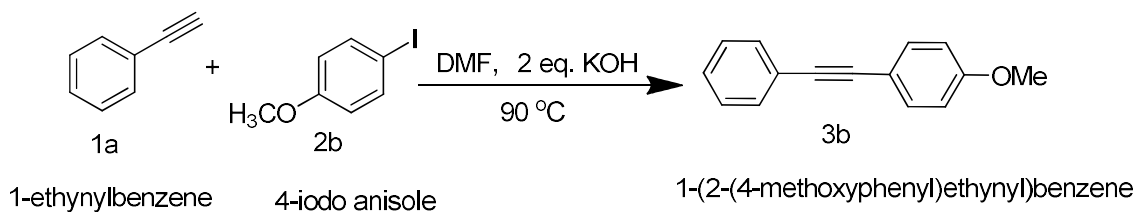

| Entry | Catalyst | Base       | Yield (%) <sup>a,b</sup> |
|-------|----------|------------|--------------------------|
| 1     | -        | <b>KOH</b> | <b>0</b>                 |



## 5. Characterization of Product

### 1, 2-Diphenylethyne<sup>5</sup>

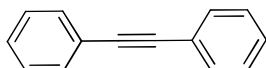

The flask was charged with 5 mol% CuSeO<sub>3</sub>·2H<sub>2</sub>O (11 mg) and 2 mL DMF. To this iodobenzene (204 mg, 1 mmol), phenylethyne (122 mg, 1.2 mmol), KOH (112 mg, 2 eq.) were added, back filled with N<sub>2</sub> for three times and stirred at 90°C. After the time specified in the reaction schemes, the reaction mixture was cooled and worked up with brine solution, ethylacetate and cold water (20 x 5) ml. The organic layer was separated and concentrated in rotor. The product was isolated by flash chromatography (EtOAc and hexanes as eluent) to afford 92% (164 mg) yield.

White solid

<sup>1</sup>H NMR (400 MHz, CDCl<sub>3</sub>): δ 7.53–7.55 (m, 4 H), 7.36–34 (m, 4 H).

<sup>13</sup>C NMR (100 MHz, CDCl<sub>3</sub>): δ 131.61, 128.34, 128.24, 123.28, 89.36.

### 1-Methoxy-4-(2-phenylethynyl)benzene<sup>3</sup>

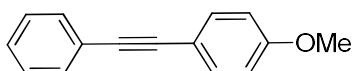

The flask was charged with 5 mol% CuSeO<sub>3</sub>·2H<sub>2</sub>O (11 mg) and 2 mL DMF. To this 4-iodoanisole (234 mg, 1 mmol), phenylethyne (122 mg, 1.2 mmol), KOH (112 mg, 2 eq.) were added, back filled with N<sub>2</sub> for three times and stirred at 90°C. After the time specified in the reaction schemes, the reaction mixture was cooled and worked up with brine solution, ethylacetate and cold water (20 x 5) ml. The organic layer was separated and concentrated in rotor. The product was isolated by flash chromatography (EtOAc and hexanes as eluent) to afford in 95% (198 mg) yield.

Yellow solid

<sup>1</sup>H NMR (400 MHz, CDCl<sub>3</sub>): δ 7.52 (d, *J* = 8.0 Hz, 2 H), 7.48 (d, *J* = 8.0 Hz, 2 H), 7.34–7.32 (m, 3 H), 6.89 (d, *J* = 8.2 Hz, 2 H), 3.83 (s, 3 H).

<sup>13</sup>C NMR (100 MHz, CDCl<sub>3</sub>): δ 159.62, 133.05, 131.04, 128.29, 127.92, 123.60, 113.99, 89.35, 88.05, 55.30.

### 1-Methyl-4-(2-phenylethynyl)benzene<sup>18</sup>

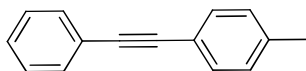

The flask was charged with 5 mol% CuSeO<sub>3</sub>·2H<sub>2</sub>O (11 mg) and 2 mL DMF. To this 4-iodotoluene (218 mg, 1 mmol), phenylethyne (122 mg, 1.2 mmol), KOH (112 mg, 2 eq.) were added, back filled with N<sub>2</sub> for three times and stirred at 90°C. After the time specified in the reaction schemes, the reaction mixture was cooled and worked up with brine solution, ethylacetate and cold water (20 x 5) ml. The organic layer was separated and concentrated in rotor. The product was isolated by flash chromatography (EtOAc and hexanes as eluent) to afford 90% (172 mg) yield.

<sup>1</sup>H NMR (400 MHz, CDCl<sub>3</sub>): δ 7.54 (d, *J* = 8.0 Hz, 2 H), 7.45 (d, *J* = 8.0 Hz, 2 H), 7.36–7.33 (m, 3 H), 7.17 (d, *J* = 8.0 Hz, 2 H), 2.38 (s, 3 H).

**<sup>13</sup>C NMR (100 MHz, CDCl<sub>3</sub>):** δ 138.37, 131.54, 131.49, 129.38, 129.10, 128.64, 128.30, 128.06, 126.42, 123.48, 120.19, 21.49.

### 1-Nitro-4-(2-phenylethynyl)benzene<sup>3</sup>

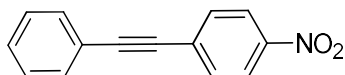

The flask was charged with 5 mol% CuSeO<sub>3</sub>·2H<sub>2</sub>O (11 mg) and 2 mL DMF. To this 1-iodo-4-nitro benzene (248 mg, 1 mmol), phenylethyne (122 mg, 1.2 mmol), KOH (112 mg, 2 eq.) were added, back filled with N<sub>2</sub> for three times and stirred at 90°C under N<sub>2</sub>. After the time specified in the reaction schemes, the reaction mixture was cooled and worked up with brine solution, ethylacetate and cold water (20 x 5) ml. The organic layer was separated and concentrated in rotor. The product was isolated by flash chromatography (EtOAc and hexanes as eluent) to afford 96% (107 mg) yield

Yellow solid

**<sup>1</sup>H NMR (400 MHz, CDCl<sub>3</sub>):** δ 8.21 (d, *J* = 12 Hz, 2 H), 7.68 (d, *J* = 8 Hz, 2 H), 7.58-7.55(m, 2 H), 7.49-7.39 (m, 2 H).

**<sup>13</sup>C NMR (100 MHz, CDCl<sub>3</sub>):** d 147.03, 132.26, 131.84, 129.27, 128.53, 123.64, 122.10, 94.70, 87.54

### 1-(4-(phenylethynyl)phenyl)ethanone<sup>3</sup>

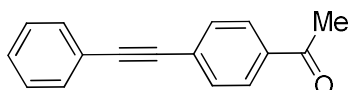

The flask was charged with 5 mol% CuSeO<sub>3</sub>·2H<sub>2</sub>O (11 mg) and 2 mL DMF. To this 4-iodo acetophenone (226 mg, 1 mmol), phenylethyne (122 mg, 1.2 mmol), KOH (112 mg, 2 eq.) were added, back filled with N<sub>2</sub> for three times and stirred at 90°C under N<sub>2</sub>. After the time specified in the reaction schemes, the reaction mixture was cooled and worked up with brine solution, ethylacetate and cold water (20 x 5) ml. The organic layer was separated and concentrated in rotor. The product was isolated by flash chromatography (EtOAc and hexanes as eluent) to afford 95% (210 mg) yield.

Yellowish solid

**<sup>1</sup>H NMR (400 MHz, CDCl<sub>3</sub>):** δ 7.93 (d, *J* = 8 Hz, 2 H), 7.62 (d, *J* = 8 Hz, 2 H), 7.57-7.54(m, 2 H), 7.38-7.36 (m, 3 H), 2.62(s, 3H).

**<sup>13</sup>C NMR (100 MHz, CDCl<sub>3</sub>):** δ 197.32, 136.21, 131.74, 131.70, 128.81, 128.44, 128.27, 122.66, 92.71, 88.60, 26.61

### 4-(phenylethynyl)benzonitrile<sup>13</sup>

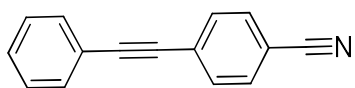

The flask was charged with 5 mol% CuSeO<sub>3</sub>·2H<sub>2</sub>O (11mg) and 2 mL DMF. To this 4-bromo benzonitrile (182 mg, 1 mmol), phenylethyne (122 mg, 1.2 mmol), KOH (112 mg, 2 eq.) were added, back filled with N<sub>2</sub> for three times and stirred at 90°C under N<sub>2</sub>. After the time specified in the reaction schemes, the reaction mixture was cooled and worked up with brine solution, ethylacetate and water (20 x 5) ml. The organic layer was separated and concentrated in rotor. The product was isolated by flash chromatography (EtOAc and hexanes as eluent) to afford 90% (182 mg) yield.

Colorless liquid

**<sup>1</sup>H NMR (400 MHz, CDCl<sub>3</sub>):** δ 7.65-7.61 (m, 4H), 7.56-7.51 (m, 3H), 7.39-7.37 (m, 2H),

**<sup>13</sup>C NMR (100 MHz, CDCl<sub>3</sub>):** δ 133.39, 132.63, 132.06, 132.03, 131.78, 129.11, 128.49, 127.27, 122.21, 118.51, 110.20, 93.77, 87.70.

### 1-fluoro-4-(phenylethynyl)benzene<sup>8</sup>

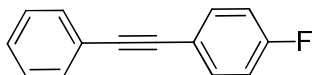

The flask was charged with 5 mol% CuSeO<sub>3</sub>·2H<sub>2</sub>O (11 mg) and 2 mL DMF. To this 4-Fluoroiodobenzene (222 mg, 1 mmol), phenylethyne (122 mg, 1.2 mmol), KOH (112 mg, 2 eq.) were added, back filled with N<sub>2</sub> for three times and stirred at 90°C under N<sub>2</sub>. After the time specified in the reaction schemes, the reaction mixture was cooled and worked up with brine solution, ethylacetate and water (20 x 5) ml. The organic layer was separated and concentrated in rotor. The product was isolated by flash chromatography (EtOAc and hexanes as eluent) to afford 87% (170 mg) yield.

Colorless liquid

**<sup>1</sup>H NMR (400 MHz, CDCl<sub>3</sub>):** δ 7.55-7.51 (m, 5H), 7.36 (d, *J* = 8 Hz, 4H),

**<sup>13</sup>C NMR (100 MHz, CDCl<sub>3</sub>):** δ 163.17, 161.36, 138.90, 133.50, 133.42 (*J*=8 Hz), 132.49, 131.54, 129.19, 128.43, 128.36, 128.31, 121.79, 115.73, 115.51, 89.06, 88.41, 81.54.

### 1,4-Bis(phenylethynyl)benzene<sup>2</sup>

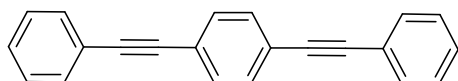

The flask was charged with 5 mol% CuSeO<sub>3</sub>·2H<sub>2</sub>O (11mg) and 2 mL DMF. To this 1,4-diiodo benzene (338 mg, 1 mmol), phenylethyne (122 mg, 1.2 mmol), KOH (112 mg, 2 eq.) were added back filled with N<sub>2</sub> for three times and stirred at 90°C under N<sub>2</sub>. After the time specified in the reaction schemes, the reaction mixture was cooled and worked up with brine solution, ethylacetate and cold water (20 x 5) ml. The organic layer was separated and concentrated in rotor. The product was isolated by flash chromatography (EtOAc and hexanes as eluent) to afford 90% (250 mg) yield.

**<sup>1</sup>H NMR (400 MHz, CDCl<sub>3</sub>):** δ 7.51-7.54 (m, 8 H), 7.36-7.35 (m, 6 H),

**<sup>13</sup>C NMR (100 MHz, CDCl<sub>3</sub>):** δ 131.62, 131.52, 128.45, 128.38, 123.09, 123.03, 91.21, 89.06.

### 3-(phenylethynyl)furan<sup>9</sup>

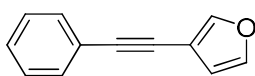

**<sup>1</sup>H NMR (400 MHz, CDCl<sub>3</sub>):** δ 7.55-7.53 (m, 3H), 7.38-7.33 (m, 5H).

**<sup>13</sup>C NMR (100 MHz, CDCl<sub>3</sub>):** δ 145.68, 142.90, 132.52, 129.22, 128.46, 128.35, 128.22, 126.48, 121.42, 112.57, 81.57, 73.93.

The flask was charged with 5 mol% CuSeO<sub>3</sub>·2H<sub>2</sub>O (11 mg) and 2 mL DMF. To this 3-bromobenzofuran (196 mg, 1 mmol), phenylethyne (122 mg, 1.2 mmol), KOH (112 mg, 2 eq.) were added, back filled with N<sub>2</sub> for three times and stirred at 90°C under N<sub>2</sub>. After the time specified in the reaction schemes, the reaction mixture was cooled and worked up with brine solution, ethylacetate and cold water (20 x 5) ml. The organic layer was separated and concentrated in rotor. The product was isolated by flash chromatography (EtOAc and hexanes as eluent) to afford 70% (118 mg) yield.

brown solid



### 2-(p-tolylethynyl)thiophene<sup>16</sup>

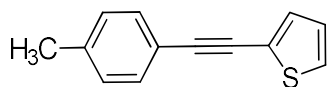

The flask was charged with 5 mol% CuSeO<sub>3</sub>·2H<sub>2</sub>O (11 mg) and 2 mL DMF. To this 2-Iodothiophene (210 mg, 1 mmol), 4-Ethynyltoluene (140 mg, 1.2 mmol), KOH (112 mg, 2 eq.) were added, back filled with N<sub>2</sub> for three times and stirred at 90°C under N<sub>2</sub>. After the time specified in the reaction schemes, the reaction mixture was cooled and worked up with brine solution, ethylacetate and cold water (20 x 5) ml. The organic layer was separated and concentrated in rotor. The product was isolated by flash chromatography (EtOAc and hexanes as eluent) to afford 75% (138 mg) yield.

Light brown solid

<sup>1</sup>H NMR (400 MHz, CDCl<sub>3</sub>): δ 7.45 (d, *J* = 8 Hz, 2H), 7.31 (d, *J* = 8 Hz, 2H), 7.19 (d, *J* = 8 Hz, 2H), 7.03 (d, *J* = 8 Hz, 2H), 2.39 (s, 3H).

<sup>13</sup>C NMR (100 MHz, CDCl<sub>3</sub>): δ 138.60, 132.37, 131.63, 131.30, 129.20, 129.13, 127.04, 126.99, 123.543, 119.80, 93.19, 81.90, 21.52.

### 1-methoxy-4-(p-tolylethynyl)benzene<sup>16</sup>

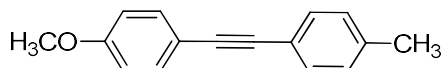

The flask was charged with 5 mol% CuSeO<sub>3</sub>·2H<sub>2</sub>O (11 mg) and 2 mL DMF. To this 4-iodo toluene (218 mg, 1 mmol), 4-ethynyl anisole (158 mg, 1.2 mmol), KOH (112 mg, 2 eq.) were added back filled with N<sub>2</sub> for three times and stirred at 90°C under N<sub>2</sub>. After the time specified in the reaction schemes, the reaction mixture was cooled and worked up with brine solution, ethylacetate and cold water (20 x 5) ml. The organic layer was separated and concentrated in rotor. The product was isolated by flash chromatography (EtOAc and hexanes as eluent) to afford 82% (182n mg) yield.

Light Yellowish solid

<sup>1</sup>H NMR (400 MHz, CDCl<sub>3</sub>): δ 7.45 (d, *J*=8 HZ, 2H), 7.39 (d, *J*=8 HZ, 2H), 7.15 (d, *J*=8 HZ, 2H), 6.88 (d, *J*=8 HZ, 2H), 3.83(s, 3 H), 2.36(s, 3 H).

<sup>13</sup>C NMR (100 MHz, CDCl<sub>3</sub>): δ 159.45, 138.24, 132.96, 131.33, 129.34, 129.06, 127.75, 120.43, 115.33, 113.96, 88.72, 88.11, 56.29, 21.47.

### 1,2-bis(4-methoxyphenyl)ethyne<sup>11</sup>

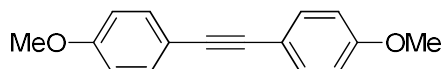

The flask was charged with 5 mol% CuSeO<sub>3</sub>·2H<sub>2</sub>O (11 mg) and 2 mL DMF. To this 4-iodo anisole (234 mg, 1 mmol), 4-ethynyl anisole (158 mg, 1.2 mmol), KOH (112 mg, 2 eq.) were added, back filled with N<sub>2</sub> for three times and stirred at 90°C under N<sub>2</sub>. After the time specified in the reaction schemes, the reaction mixture was cooled and worked up with brine solution, ethylacetate and cold water (20 x 5) ml. The organic layer was separated and concentrated in rotor. The product was isolated by flash chromatography (EtOAc and hexanes as eluent) to afford 85% (202 mg) yield.

White solid

<sup>1</sup>H NMR (400 MHz, CDCl<sub>3</sub>): δ 7.44-7.41 (m, 4 H), 6.93-6.86 (m, 4 H), 3.82(s, 3 H).

**<sup>13</sup>C NMR (100 MHz, CDCl<sub>3</sub>):** δ 159.39, 134.04, 132.87, 127.41, 126.19, 115.74, 114.11, 113.96, 87.94, 55.29

**1-(4-((4-methoxyphenyl)ethynyl)phenyl)ethanone<sup>11</sup>**

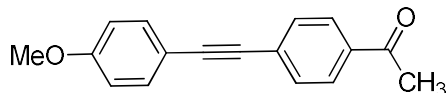

The flask was charged with 5 mol% CuSeO<sub>3</sub>·2H<sub>2</sub>O (11 mg) and 2 mL DMF. To this 4-iodo acetophenone (246 mg, 1 mmol), 4-ethynyl anisole (158 mg, 1.2 mmol), KOH (112 mg, 2 eq.) were added, back filled with N<sub>2</sub> for three times and stirred at 90°C under N<sub>2</sub>. After the time specified in the reaction schemes, the reaction mixture was cooled and worked up with brine solution, ethylacetate and cold water (20 x 5) ml. The organic layer was separated and concentrated in rotor. The product was isolated by flash chromatography (EtOAc and hexanes as eluent) to afford 90% (226 mg) yield.

Light Yellowish solid

**<sup>1</sup>H NMR (400 MHz, CDCl<sub>3</sub>):** δ 7.93 (d, *J* = 8 Hz, 2 H), 7.59 (d, *J* = 8 Hz, 2 H), 7.50 (d, *J* = 8 Hz, 2 H), 6.90 (d, *J* = 8 Hz, 2 H), 3.83(s, 3H), 2.60(s, 3H).

**<sup>13</sup>C NMR (100 MHz, CDCl<sub>3</sub>):** δ 197.31, 160.03, 135.85, 133.25, 131.44, 128.58, 128.23, 114.68, 114.09, 92.94, 87.49, 55.29, 26.55.

**1-methoxy-4-((4-nitrophenyl)ethynyl)benzene<sup>11</sup>**

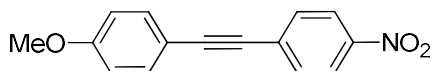

The flask was charged with 5 mol% CuSeO<sub>3</sub>·2H<sub>2</sub>O (11 mg) and 2 mL DMF. To this 1-iodo-4-nitro benzene (248 mg, 1 mmol), 4-ethynyl anisole (158 mg, 1.2 mmol), KOH (112mg, 2 eq.) were added, back filled with N<sub>2</sub> for three times and stirred at 90°C under N<sub>2</sub>. After the time specified in the reaction schemes, the reaction mixture was cooled and worked up with brine solution, ethylacetate and cold water (20 x 5) ml. The organic layer was separated and concentrated in rotor. The product was isolated by flash chromatography (EtOAc and hexanes as eluent) to afford 93% (236 mg) yield.

Yellow solid

**<sup>1</sup>H NMR (400 MHz, CDCl<sub>3</sub>):** δ 8.21 (d, *J* = 8 Hz, 2 H), 7.63 (d, *J* = 8 Hz, 2 H), 7.51(t, *J* = 12 Hz, 2H), 6.92 (d, *J* = 12 Hz, 2H), 3.84 (s, 3 H).

**<sup>13</sup>C NMR (100 MHz, CDCl<sub>3</sub>):** δ 160.40, 146.66, 133.42, 131.96, 130.67, 123.59, 114.19, 114.10, 95.12, 86.61, 55.13.

**1-ethyl-4-(p-tolyethynyl)benzene<sup>15</sup>**

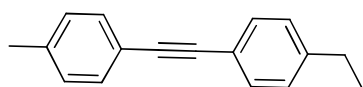

The flask was charged with 5 mol% CuSeO<sub>3</sub>·2H<sub>2</sub>O (11 mg) and 2 mL DMF. To this 1-bromo-4-ethyl benzene(184 mg, 1.2 mmol), 4-ethynyl toluene(140 mg, 1.2 mmol), KOH (112 mg, 2 eq.) were added, back filled with N<sub>2</sub> for three times and stirred at 90°C under N<sub>2</sub>. After the time specified in the reaction schemes, the reaction mixture was cooled and worked up with brine solution, ethylacetate and cold water

(20 x 5) ml. The organic layer was separated and concentrated in rotor. The product was isolated by flash chromatography (EtOAc and hexanes as eluent) to afford 90% (198 mg) yield.

yellow solid

**<sup>1</sup>H NMR (400 MHz, CDCl<sub>3</sub>):** δ 7.46-7.41(m, 4H), 7.19-7.057(m, 4H), 2.67(q, J=4Hz, 2H), 2.37 (s, 3H), 1.25 (t, J=8 Hz, 3H),

**<sup>13</sup>C NMR(100MHz,CDCl<sub>3</sub>):**δ 144.46, 139.47, 138.14, 132.38, 131.51, 131.43, 129.20, 129.06, 127.87, 126.37, 126.30, 120.62, 120.40, 118.79, 88.85, 81.53, 28.80, 21.59, 15.33.

#### 1-fluoro-4-(phenylethynyl)benzene<sup>16</sup>

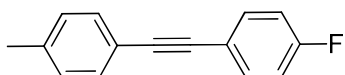

The flask was charged with 5 mol% CuSeO<sub>3</sub>.2H<sub>2</sub>O (11 mg) and 2 mL DMF. To this 4-Fluoriodobenzene (222 mg, 1 mmol), 4-ethynyl toluene (140 mg, 1.2 mmol), KOH (112 mg, 2 eq.) were added, back filled with N<sub>2</sub> for three times and stirred at 90°C under N<sub>2</sub>. After the time specified in the reaction schemes, the reaction mixture was cooled and worked up with brine solution, ethylacetate and water (20 x 5) ml. The organic layer was separated and concentrated in rotor. The product was isolated by flash chromatography (EtOAc and hexanes as eluent) to afford 88% (184 mg) yield.

Colorless liquid

**<sup>1</sup>H NMR (400 MHz, CDCl<sub>3</sub>):** δ 7.52-7.49 (m, 2H), 7.44 (d, J = 8 Hz, 2H), 7.16 (d, J = 8 Hz, 2H), 7.04 (t, J = 8 Hz, 2H), 2.38(s, 3H).

**<sup>13</sup>C NMR (100 MHz, CDCl<sub>3</sub>):** δ 163.61, 161.13, 138.46, 133.41, 133.33, 132.37, 131.42, 129.19, 129.12, 119.97, 115.46, 115.38, 89.19, 87.61, 21.59.

#### 1,2-di-p-tolylethyne<sup>7</sup>

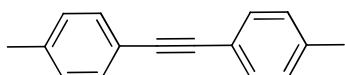

The flask was charged with 5 mol% CuSeO<sub>3</sub>.2H<sub>2</sub>O (11 mg) and 2 mL DMF. To this 4-iodo toluene (218 mg, 1 mmol), 4-ethynyl toluene (140 mg, 1.2 mmol), KOH (112 mg, 2 eq.) were added, back filled with N<sub>2</sub> for three times and stirred at 90°C under N<sub>2</sub>. After the time specified in the reaction schemes, the reaction mixture was cooled and worked up with brine solution, ethylacetate and water (20 x 5) ml. The organic layer was separated and concentrated in rotor. The product was isolated by flash chromatography (EtOAc and hexanes as eluent) to afford 90% (186 mg) yield.

Colorless liquid

**<sup>1</sup>H NMR (400 MHz, CDCl<sub>3</sub>):** δ 7.36 (d, J = 8 Hz, 4H), 7.16 (t, J = 4 Hz, 4H),

**<sup>13</sup>C NMR (100 MHz, CDCl<sub>3</sub>):** δ 139.46, 138.14, 132.36, 131.40, 129.33, 129.19, 129.06, 127.59, 126.28, 120.36, 118.75, 88.85, 81.52, 73.43, 21.46.

#### 1-(tert-butyl)-4-(phenylethynyl)benzene<sup>14</sup>

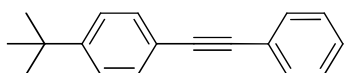

The flask was charged with 5 mol% CuSeO<sub>3</sub>.2H<sub>2</sub>O (11 mg) and 2 mL DMF. To this iodo benzene(204 mg, 1 mmol), 4-tert-Butyl phenylacetylene (190 mg, 1.2 mmol), KOH (112 mg, 2 eq.) were added, back filled with N<sub>2</sub> for three times and stirred at 90°C under N<sub>2</sub>. After the time specified in the reaction schemes,

the reaction mixture was cooled and worked up with brine solution, ethylacetate and cold water (20 x 5) ml. The organic layer was separated and concentrated in rotor. The product was isolated by flash chromatography (EtOAc and hexanes as eluent) to afford 91% (214 mg) yield.

yellow solid

$^1\text{H NMR}$  (400 MHz,  $\text{CDCl}_3$ ):  $\delta$  7.55-7.52(m, 2H), 7.49-7.47(m, 2H), 7.39-7.33(m, 5H), 1.34 (s, 9H).

$^{13}\text{CNMR}$ (100MHz, $\text{CDCl}_3$ ): $\delta$  151.97, 140.73, 137.89, 131.56, 131.32, 128.29, 128.04, 125.33, 123.51, 120.23, 89.52, 88.71, 34.78, 31.17

#### 1-(tert-butyl)-4-((4-fluorophenyl)ethynyl)benzene<sup>4</sup>

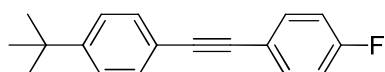

The flask was charged with 5 mol%  $\text{CuSeO}_3 \cdot 2\text{H}_2\text{O}$  (11 mg) and 2 mL DMF. To this 4-fluoroiodobenzene (222 mg, 1 mmol), 4-tert-Butyl phenylacetylene (190 mg, 1,2 mmol), KOH (112 mg, 2 eq.) were added, back filled with  $\text{N}_2$  for three times and stirred at  $90^\circ\text{C}$  under  $\text{N}_2$ . After the time specified in the reaction schemes, the reaction mixture was cooled and worked up with brine solution, ethylacetate and cold water (20 x 5) ml. The organic layer was separated and concentrated in rotor. The product was isolated by flash chromatography (EtOAc and hexanes as eluent) to afford 94% (118 mg) yield.

$^1\text{H NMR}$  (400 MHz,  $\text{CDCl}_3$ ):  $\delta$  7.54-7.47(m, 4H), 7.40(d,  $J = 8$  Hz, 2H), 7.05 (d,  $J = 8$  Hz, 2H), 1.35 (s, 9H).

$^{13}\text{CNMR}$ (100MHz, $\text{CDCl}_3$ ): $\delta$  163.61, 161.13, 151.60, 133.44, 133.36, 132.24, 131.27, 125.45, 125.36, 120.04, 115.67, 115.45, 189.18, 87.63, 34.77, 31.15

#### 1-(tert-butyl)-4-((4-methoxyphenyl)ethynyl)benzene<sup>19</sup>

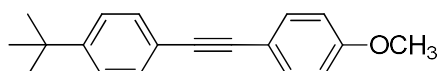

The flask was charged with 5 mol%  $\text{CuSeO}_3 \cdot 2\text{H}_2\text{O}$  (11 mg) and 2 mL DMF. To this iodo anisole (234 mg, 1 mmol), 4-tert-Butyl phenylacetylene (190 mg, 1.2 mmol), KOH (112 mg, 2 eq.) were added, back filled with  $\text{N}_2$  for three times and stirred at  $90^\circ\text{C}$  under  $\text{N}_2$ . After the time specified in the reaction schemes, the reaction mixture was cooled and worked up with brine solution, ethylacetate and cold water (20 x 5) ml. The organic layer was separated and concentrated in rotor. The product was isolated by flash chromatography (EtOAc and hexanes as eluent) to afford 92% (244 mg) yield.

yellow solid

$^1\text{H NMR}$  (400 MHz,  $\text{CDCl}_3$ ):  $\delta$  7.48(t,  $J = 4$  Hz, 4H), 7.38(d,  $J = 8$  Hz, 2H), 6.90(d,  $J = 12$  Hz, 2H), 3.83(s, 3H), 1.34 (s, 9H).

$^{13}\text{CNMR}$ (100MHz, $\text{CDCl}_3$ ): $\delta$  159.47, 151.15, 132.98, 131.15, 127.58, 125.96, 120.54, 115.63, 114.09, 113.94, 88.65, 88.16, 55.25, 34.72, 31.16.

#### 1-methyl-3-(phenylethynyl)benzene<sup>12</sup>

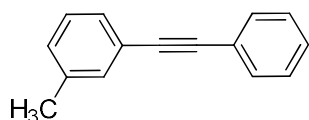

The flask was charged with 5 mol%  $\text{CuSeO}_3 \cdot 2\text{H}_2\text{O}$  (11 mg) and 2 mL DMF. To this iodo benzene(204 mg, 1 mmol), 3-ethynyl toluene (140 mg, 1.2 mmol), KOH (112 mg, 2 eq.) were added, back filled with  $\text{N}_2$  for three times and stirred at  $90^\circ\text{C}$  under  $\text{N}_2$ . After the time specified in the reaction schemes, the reaction

mixture was cooled and worked up with brine solution, ethylacetate and water (20 x 5) ml. The organic layer was separated and concentrated in rotor. The product was isolated by flash chromatography (EtOAc and hexanes as eluent) to afford 90% (172 mg) yield.

Colorless liquid

**<sup>1</sup>H NMR (400 MHz, CDCl<sub>3</sub>):** δ 7.59-7.57 (m, 2H), 7.41-7.37 (m, 5H), 7.28 (d, *J* = 8 Hz, 1H), 7.20 (d, *J* = 8 Hz, 1H), 2.40 (s, 3 H).

**<sup>13</sup>C NMR (100 MHz, CDCl<sub>3</sub>):** δ 137.99, 132.17, 131.58, 129.14, 128.67, 128.31, 128.22, 128.15, 126.45, 123.36, 123.05, 89.54, 89.01, 21.21.

#### 1-methyl-3-(p-tolylethynyl)benzene<sup>15</sup>

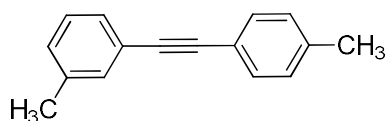

The flask was charged with 5 mol% CuSeO<sub>3</sub>·2H<sub>2</sub>O (11 mg) and 2 mL DMF. To this 4-iodotoluene (218 mg, 1 mmol), 3-ethynyl toluene (140 mg, 1.2 mmol), KOH (112 mg, 2 eq.) were added, back filled with N<sub>2</sub> for three times and stirred at 90°C under N<sub>2</sub>. After the time specified in the reaction schemes, the reaction mixture was cooled and worked up with brine solution, ethylacetate and cold water (20 x 5) ml. The organic layer was separated and concentrated in rotor. The product was isolated by flash chromatography (EtOAc and hexanes as eluent) to afford 89% (184 mg) yield.

White solid

**<sup>1</sup>H NMR (400 MHz, CDCl<sub>3</sub>):** δ 7.44 (d, *J* = 8 Hz, 2H), 7.35 (t, *J* = 8 Hz, 2H), 7.24 (t, *J* = 8 Hz, 1H), 7.15 (t, *J* = 8 Hz, 2H), 2.38 (s, 3 H), 2.36 (s, 3 H).

**<sup>13</sup>C NMR (100 MHz, CDCl<sub>3</sub>):** δ 138.28, 137.95, 132.12, 131.47, 129.08, 128.97, 128.60, 128.20, 126.37, 123.57, 123.24, 120.26, 89.19, 88.87, 21.48, 21.22.

#### 1-((4-methoxyphenyl)ethynyl)-3-methylbenzene<sup>11</sup>

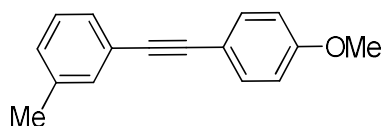

The flask was charged with 5 mol% CuSeO<sub>3</sub>·2H<sub>2</sub>O (11 mg) and 2 mL DMF. To this iodoanisole (234mg, 1 mmol), 3-ethynyl toluene (140 mg, 1.2 mmol), KOH (112 mg, 2 eq.) were added, back filled with N<sub>2</sub> for three times and stirred at 90°C under N<sub>2</sub>. After the time specified in the reaction schemes, the reaction mixture was cooled and worked up with brine solution, ethylacetate and cold water (20 x 5) ml. The organic layer was separated and concentrated in rotor. The product was isolated by flash chromatography (EtOAc and hexanes as eluent) to afford 86% (190 mg) yield.

Yellow semi-liquid

**<sup>1</sup>H NMR (400 MHz, CDCl<sub>3</sub>):** δ 7.48 (d, *J* = 8 Hz, 2 H), 7.35-7.31 (m, 2 H), 7.23(t, *J* = 8 Hz, 1H), 7.14 (d, *J* = 8 Hz, 1H), 7.89(d, *J* = 8 Hz, 2H), 3.83 (s, 3 H), 2.35(s, 3H).

**<sup>13</sup>C NMR (100 MHz, CDCl<sub>3</sub>):** δ 159.55, 137.95, 133.02, 132.03, 128.83, 128.51, 128.19, 127.66, 115.49, 113.97, 89.00, 88.21, 55.29, 21.23.

### 1-methoxy-2-(phenylethynyl)benzene<sup>3</sup>

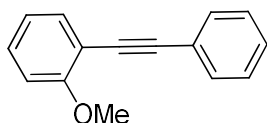

The flask was charged with 5 mol% CuSeO<sub>3</sub>·2H<sub>2</sub>O (11 mg) and 2 mL DMF. To this iodo benzene (204mg, 1 mmol), 2-ethynyl anisole (158 mg, 1.2 mmol), KOH (112 mg, 2 eq.) were added, back filled with N<sub>2</sub> for three times and stirred at 90°C under N<sub>2</sub>. After the time specified in the reaction schemes, the reaction mixture was cooled and worked up with brine solution, ethylacetate and cold water (20 x 5) ml. The organic layer was separated and concentrated in rotor. The product was isolated by flash chromatography (EtOAc and hexanes as eluent) to afford 93% (184 mg) yield.

Yellow liquid

<sup>1</sup>H NMR (400 MHz, CDCl<sub>3</sub>): δ 7.58 (d, *J* = 8.0 Hz, 2 H), 7.51 (d, *J* = 8.0 Hz, 1 H), 7.34–7.31 (m, 4 H), 6.96–6.90 (m, 2 H), 3.92 (s, 3 H).

<sup>13</sup>C NMR (100 MHz, CDCl<sub>3</sub>): δ 159.93, 133.57, 131.65, 129.73, 128.22, 128.08, 123.57, 120.48, 110.73, 93.41, 85.70, 55.85.

### 1-methoxy-2-(p-tolylethynyl)benzene<sup>10</sup>

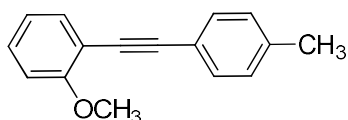

The flask was charged with 5 mol% CuSeO<sub>3</sub>·2H<sub>2</sub>O (11 mg) and 2 mL DMF. To this 4- iodo toluene (218 mg, 1 mmol), 2-ethynyl anisole (158 mg, 1.2 mmol), KOH (112 mg, 2 eq.) were added, back filled with N<sub>2</sub> for three times and stirred at 90°C under N<sub>2</sub>. After the time specified in the reaction schemes, the reaction mixture was cooled and worked up with brine solution, ethylacetate and cold water (20 x 5) ml. The organic layer was separated and concentrated in rotor. The product was isolated by flash chromatography (EtOAc and hexanes as eluent) to afford 90% (200 mg) yield.

Yellow liquid

<sup>1</sup>H NMR (400 MHz, CDCl<sub>3</sub>): δ 7.52–7.46 (m, 3 H), 7.30 (d, *J* = 8 Hz, 1H), 7.17 (d, *J* = 8 Hz, 1H), 6.96–6.90 (m, 2H), 3.92(s, 3 H), 2.37(s, 3 H).

<sup>13</sup>C NMR (100 MHz, CDCl<sub>3</sub>): δ 159.83, 138.15, 133.50, 131.52, 129.52, 128.97, 120.44, 112.64, 110.67, 93.60, 84.99, 55.80, 21.46.

### 1-methoxy-2-((4-methoxyphenyl)ethynyl)benzene<sup>6</sup>

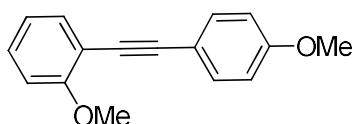

The flask was charged with 5 mol% CuSeO<sub>3</sub>·2H<sub>2</sub>O (11 mg) and 1 mL DMF. To this 4- iodoanisole(234 mg, 1 mmol), 2-ethynyl anisole (158 mg, 1.2 mmol), KOH (112 mg, 2 eq.) were added, back filled with N<sub>2</sub> for three times and stirred at 90°C under N<sub>2</sub>. After the time specified in the reaction schemes, the reaction mixture was cooled and worked up with brine solution, ethylacetate and cold water (20 x 5) ml. The organic layer was separated and concentrated in rotor. The product was isolated by flash chromatography (EtOAc and hexanes as eluent) to afford 88% (210 mg) yield.

Brownish liquid

**<sup>1</sup>H NMR (400 MHz, CDCl<sub>3</sub>):** δ 7.52-7.48 (m, 3 H), 7.29 (d, *J* = 8 Hz, 1H), 6.95-6.86 (m, 4 H), 3.91(s, 3 H), 3.82(s, 3 H).

**<sup>13</sup>C NMR (100 MHz, CDCl<sub>3</sub>):** δ 197.31, 160.03, 135.85, 133.25, 131.44, 128.58, 128.23, 114.68, 114.09, 92.94, 87.49, 55.29, 26.55

### 1-(4-((2-bromophenyl)ethynyl)phenyl)ethanone<sup>17</sup>

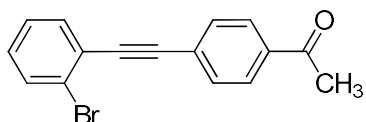

The flask was charged with 5 mol% CuSeO<sub>3</sub>·2H<sub>2</sub>O (11 mg) and 2 mL DMF. To this 4-iodoacetophenone (246 mg, 1 mmol), 1-bromo-2-ethynyl benzene (218 mg, 1.2 mmol), KOH (112 mg, 2 eq.) were added, back filled with N<sub>2</sub> for three times and stirred at 90°C under N<sub>2</sub>. After the time specified in the reaction schemes, the reaction mixture was cooled and worked up with brine solution, ethylacetate and cold water (20 x 5) ml. The organic layer was separated and concentrated in rotor. The product was isolated by flash chromatography (EtOAc and hexanes as eluent) to afford 80% (240 mg) yield.

yellow solid

**<sup>1</sup>H NMR (400 MHz, CDCl<sub>3</sub>):** δ 7.96 (d, *J* = 8 Hz, 2H), 7.67-7.63 (m, 3H), 7.59(d, *J* = 8 Hz, 1H), 7.32(d, *J* = 8 Hz, 1H), 7.22 (t, *J* = 8 Hz, 1H), 2.62 (s, 1H).

**<sup>13</sup>C NMR (100 MHz, CDCl<sub>3</sub>):** δ 197.83, 136.56, 133.39, 132.57, 131.80, 129.93, 128.28, 127.77, 127.12, 125.80, 92.92, 91.14, 26.63.

### 1-bromo-2-((4-nitrophenyl)ethynyl)benzene<sup>17</sup>

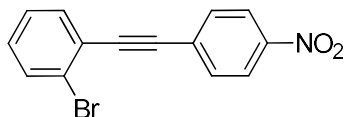

The flask was charged with 5 mol% CuSeO<sub>3</sub>·2H<sub>2</sub>O (11 mg) and 2 mL DMF. To this 1-iodo-4-nitro benzene (248 mg, 1 mmol), 1-bromo-2-ethynyl benzene (218 mg, 1.2 mmol), KOH (112 mg, 2 eq.) were added, back filled with N<sub>2</sub> for three times and stirred at 90°C under N<sub>2</sub>. After the time specified in the reaction schemes, the reaction mixture was cooled and worked up with brine solution, ethylacetate and cold water (20 x 5) ml. The organic layer was separated and concentrated in rotor. The product was isolated by flash chromatography (EtOAc and hexanes as eluent) to afford 81% (244 mg) yield.

**<sup>1</sup>H NMR (400 MHz, CDCl<sub>3</sub>):** δ 8.23 (d, *J* = 8 Hz, 2H), 7.72 (d, *J* = 8 Hz, 2H), 7.65(d, *J* = 8 Hz, 1H), 7.58 (d, *J* = 8 Hz, 1H), 7.33(t, *J* = 8 Hz, 1H), 7.24 (d, *J* = 8 Hz, 1H),

**<sup>13</sup>C NMR (100 MHz, CDCl<sub>3</sub>):** δ 147.21, 133.47, 132.64, 132.36, 130.38, 129.77, 127.19, 125.90, 124.31, 123.63, 92.99, 91.69.

### Trimethyl(phenylethynyl)silane<sup>[20]</sup>

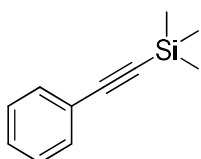

The flask was charged with 5 mol% CuSeO<sub>3</sub>·2H<sub>2</sub>O (11 mg) and 2 mL DMF. To this iodo benzene(204 mg, 1 mmol), Trimethyl silyl acetylene (186 mg, 2 mmol), KOH(112 mg, 2 eq.) were added, back filled with N<sub>2</sub> for three times and stirred at 60 °C under N<sub>2</sub>. After the time specified in the reaction schemes, the reaction mixture was cooled and worked up with brine solution, CH<sub>2</sub>Cl<sub>2</sub> and cold water (20 x 5) ml. The organic layer was separated and concentrated in rotor. The product was isolated by flash chromatography (EtOAc and hexanes as eluent) to afford 70% as volatile liquid (122 mg) yield.

<sup>1</sup>H NMR (400 MHz, CDCl<sub>3</sub>): δ = 7.72 (d, J=8 Hz, 2H), 7.33 (t, J=8 Hz, 1H), 7.11 (t, J=8 Hz, 2H), 0.07 (s, 9H)

<sup>13</sup>C NMR (100 MHz, CDCl<sub>3</sub>): δ 138.65, 137.43, 132.13, 128.99, 128.55, 127.73, 126.72

#### Trimethyl(naphthalen-1-ylethynyl)silane

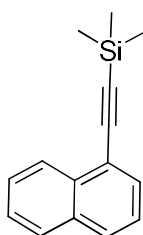

The flask was charged with 5 mol% CuSeO<sub>3</sub>·2H<sub>2</sub>O (11 mg) and 2mL DMF. To this 1- iodo naphthalene (127 mg, 0.5 mmol), Trimethyl silyl acetylene (186 mg, 2 mmol), KOH (224 mg, 2 eq.) were added, back filled with N<sub>2</sub> for three times and stirred at 60 °C under N<sub>2</sub>. After the time specified in the reaction schemes, the reaction mixture was cooled and worked up with brine solution, CH<sub>2</sub>Cl<sub>2</sub> and cold water (20 x 5) ml. The organic layer was separated and concentrated in rotor. The product was isolated by flash chromatography (EtOAc and hexanes as eluent) to afford 73% as volatile liquid (162 mg) yield.

<sup>1</sup>H NMR (400 MHz, CDCl<sub>3</sub>): δ = 8.10 (d, J=8 Hz, 2H), 7.85 (d, J=8 Hz, 1H), 7.78 (d, J=8 Hz, 1H), 7.58 (t, J=8 Hz, 1H), 7.54 (t, J=8 Hz, 1H), 7.19 (t, J=8 Hz, 2H), 0.07 (s,9H)

<sup>13</sup>C NMR (100 MHz, CDCl<sub>3</sub>): δ 138.65, 137.43, 132.13, 128.99, 128.55, 127.73, 126.72, 105.14, 100.0

CAS- Sigma-aldrich: 104784-51-2

4-(oct-1-yn-1-yl)benzonitrile<sup>[20]</sup>

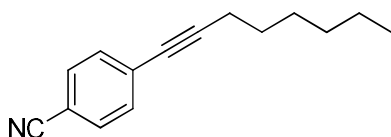

The flask was charged with 5 mol% CuSeO<sub>3</sub>·2H<sub>2</sub>O (11 mg) and 2 mL DMF. To this 4- cyano iodobenzene (228 mg, 1 mmol), 1-octyne (132 mg, 1.2 mmol), KOH (112 mg, 2 eq.) were added, back filled with N<sub>2</sub> for three times and stirred at 90°C under N<sub>2</sub>. After the time specified in the reaction schemes, the reaction mixture was cooled and worked up with brine solution, CH<sub>2</sub>Cl<sub>2</sub> and cold water (20 x 5) ml. The organic layer was separated and concentrated in rotor. The product was isolated by flash chromatography (EtOAc and hexanes as eluent) to afford 98% as volatile liquid (208 mg) yield.



**<sup>1</sup>H NMR (400 MHz, CDCl<sub>3</sub>):** δ = 7.57 (d, J=8Hz, 2H), 7.46 (d, J=, 8 Hz, 2H), 2.42 (t, J=8 Hz, 2H), 1.61 (t, J=6 Hz, 2H), 1.44 (t, J=6 Hz, 2H), 1.32 (t, J=6 Hz, 2H), 0.90 (t, J=8 Hz, 3H).

**<sup>13</sup>C NMR (100 MHz, CDCl<sub>3</sub>):** δ 132.07, 131.89, 118.64, 110.74, 95.72, 79.41, 76.78, 31.28, 28.57, 28.39, 22.51, 19.42, 14.02

### 1-methoxy-4-(oct-1-yn-1-yl)benzene <sup>[21]</sup>

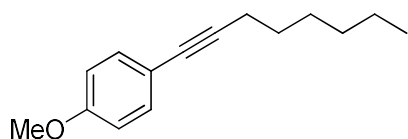

The flask was charged with 5 mol% CuSeO<sub>3</sub>·2H<sub>2</sub>O (11 mg) and 2 mL DMF. To this 4-methoxy iodobenzene (224 mg, 1 mmol), 1-octyne (132 mg, 1.2 mmol), KOH (112 mg, 2 eq.) were added, back filled with N<sub>2</sub> for three times and stirred at 90°C under N<sub>2</sub>. After the time specified in the reaction schemes, the reaction mixture was cooled and worked up with brine solution, CH<sub>2</sub>Cl<sub>2</sub> and cold water (20 x 5) ml. The organic layer was separated and concentrated in rotor. The product was isolated by flash chromatography (EtOAc and hexanes as eluent) to afford 97% as volatile liquid (210 mg) yield.

**<sup>1</sup>H NMR (400 MHz, CDCl<sub>3</sub>):** δ = 7.34 (d, J=8Hz, 2H), 6.85 (dd, J=, 8 Hz, 8Hz, 2H), 3.80(3, 3H), 2.38 (t, J=8 Hz, 2H), 1.61 (t, J=6 Hz, 2H), 1.44 (t, J=6 Hz, 2H), 1.31 (t, J=6 Hz, 2H), 0.90 (t, J=8 Hz, 3H).

**<sup>13</sup>C NMR (100 MHz, CDCl<sub>3</sub>):** δ =158.94, 132.83, 116.27, 113.77, 113.39, 88.80, 80.20, 55.23, 31.37, 28.84, 28.61, 22.56, 19.40, 14.05.

### 2-(oct-1-yn-1-yl)thiophene <sup>[22]</sup>

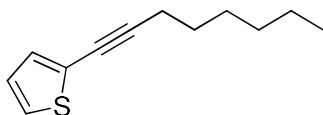

The flask was charged with 5 mol% CuSeO<sub>3</sub>·2H<sub>2</sub>O (11 mg) and 2 mL DMF. To this 2-iodothiophene (210 mg, 1 mmol), 1-octyne (132 mg, 1.2 mmol), KOH (112 mg, 2 eq.) were added, back filled with N<sub>2</sub> for three times and stirred at 90°C under N<sub>2</sub>. After the time specified in the reaction schemes, the reaction mixture was cooled and worked up with brine solution, CH<sub>2</sub>Cl<sub>2</sub> and cold water (20 x 5) ml. The organic layer was separated and concentrated in rotor. The product was isolated by flash chromatography (EtOAc and hexanes as eluent) to afford 99% as volatile liquid (190 mg) yield.

**<sup>1</sup>H NMR (400 MHz, CDCl<sub>3</sub>):** δ= 7.34 (s, 1H), 7.22 (t, J=4 Hz, 1H), 7.07 (d, J=2 Hz, 1H), 2.38 (t, J=8 Hz, 2H), 1.61 (t, J=8 Hz, 2H), 1.44 (t, J=8 Hz, 2H), 1.31 (t, J=8 Hz, 2H), 0.90 (t, J=8 Hz, 3H).

**<sup>13</sup>C NMR (100 MHz, CDCl<sub>3</sub>):** δ =130.0, 127.43, 124.91, 123.02, 89.94, 75.51, 31.35, 28.70, 28.61, 22.54, 19.37, 14.04.

#### 4-(4-methoxyphenyl)but-3-yn-1-ol <sup>[23]</sup>

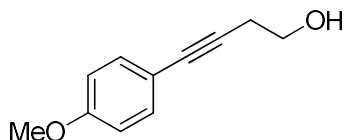

The flask was charged with 5 mol% CuSeO<sub>3</sub>·2H<sub>2</sub>O (11 mg) and 2 mL DMF. To this 4-methoxyiodobenzene (234 mg, 1 mmol), but-3-yn-1-ol (84 mg, 1.2 mmol), KOH (112 mg, 2 eq.) were added, back filled with N<sub>2</sub> for three times and stirred at 90°C under N<sub>2</sub>. After the time specified in the reaction schemes, the reaction mixture was cooled and worked up with brine solution, CH<sub>2</sub>Cl<sub>2</sub> and cold water (20 x 5) ml. The organic layer was separated and concentrated in rotor. The product was isolated by flash chromatography (EtOAc and hexanes as eluent) to afford 95% as volatile liquid (166 mg) yield.

<sup>1</sup>H NMR (400 MHz, CDCl<sub>3</sub>): δ= 7.36 (d, J=8 Hz, 2H), 6.83 (d, J=8 Hz, 2H), 3.80 (t, J=6 Hz, 2H), 2.68 (t, J=6 Hz, 2H), 1.86 (s, 1H)

<sup>13</sup>C NMR (100 MHz, CDCl<sub>3</sub>): =159.31, 133.02, 115.41, 113.86, 84.63, 82.32, 61.22, 55.25, 23.83

CAS: 52999-15-2

#### 4-(4-fluorophenyl)but-3-yn-1-ol <sup>[24]</sup>

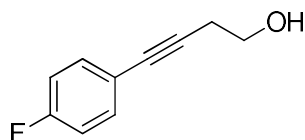

The flask was charged with 5 mol% CuSeO<sub>3</sub>·2H<sub>2</sub>O (11 mg) and 2 mL DMF. To this 4-fluoro iodobenzene (220 mg, 1 mmol), but-3-yn-1-ol (84 mg, 1.2 mmol), KOH (112 mg, 2 eq.) were added, back filled with N<sub>2</sub> for three times and stirred at 90°C under N<sub>2</sub>. After the time specified in the reaction schemes, the reaction mixture was cooled and worked up with brine solution, CH<sub>2</sub>Cl<sub>2</sub> and cold water (20 x 5) ml. The organic layer was separated and concentrated in rotor. The product was isolated by flash chromatography (EtOAc and hexanes as eluent) to afford 97% as volatile liquid (158 mg) yield

<sup>1</sup>H NMR (400 MHz, CDCl<sub>3</sub>): δ= 8.10 (dd, J=4Hz, 4 Hz, 2H), 6.98 (d, J=8 Hz, 2H), 3.81 (t, J=8 Hz, 1H), 2.68 (t, J=6 Hz, 1H), 1.84 (s, 1H)

<sup>13</sup>C NMR (100 MHz, CDCl<sub>3</sub>): = 163.05, 161.02, 133.52, 133.43, 119.36, 115.69, 115.37, 85.99, 61.12, 23.73

#### 4-(3-nitrophenyl)but-3-yn-1-ol <sup>[25]</sup>

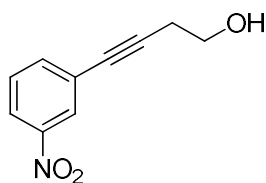

The flask was charged with 5 mol% CuSeO<sub>3</sub>·2H<sub>2</sub>O (11 mg) and 2 mL DMF. To this 4-nitro iodobenzene (250 mg, 1 mmol), but-3-yn-1-ol (84 mg, 1.2 mmol), KOH (112 mg, 2 eq.) were added, back filled with N<sub>2</sub> for three times and stirred at 90°C under N<sub>2</sub>. After the time specified in the reaction schemes, the reaction mixture was cooled and worked up with brine solution, CH<sub>2</sub>Cl<sub>2</sub> and cold water (20 x 5) ml. The organic layer was separated and concentrated in rotor. The product was isolated by flash chromatography (EtOAc and hexanes as eluent) to afford 96% as volatile liquid (184 mg) yield

<sup>1</sup>H NMR (400 MHz, CDCl<sub>3</sub>): δ= 8.24 (s, 1H), 8.14 (d, J=8 Hz, 1H), 7.71 (d, J=8 Hz, 1H), 7.46 (t, J=8 Hz, 1H), 3.85 (t, J=8 Hz, 2H), 2.71 (t, J=6 Hz, 2H), 1.98 (s, 1H)

<sup>13</sup>C NMR (100 MHz, CDCl<sub>3</sub>): = 147.99, 137.36, 129.20, 126.48, 125.18, 122.61, 89.65, 80.02, 60.88, 23.66

### 1,3,5-tris(phenylethynyl)benzene<sup>1</sup>:

The flask was charged with 5 mol% CuSeO<sub>3</sub>·2H<sub>2</sub>O (11 mg) and 2 mL DMF. To this To this 2,4,6-tribromobenzene (157 mg, 0.5 mmol), phenylethyne (162 mg, 1.5 mmol), KOH (112 mg, 2 eq.) were added back filled with N<sub>2</sub> for three times and stirred at 90°C under N<sub>2</sub>. After the time specified in the reaction schemes, the reaction mixture was cooled and worked up with brine solution, ethylacetate and cold water (20 x 5) ml. The organic layer was separated and concentrated in rotor. The product was isolated by flash chromatography (EtOAc and hexanes as eluent) to afford 94% (178 mg) yield.

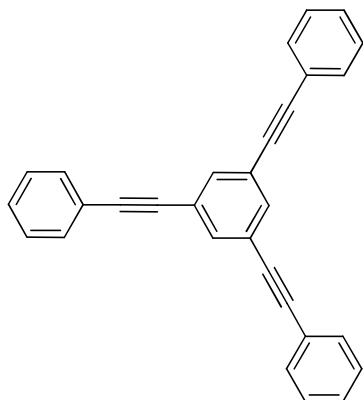

<sup>1</sup>H NMR (400 MHz, CDCl<sub>3</sub>): δ 7.69 (d, J = 4 Hz, 3 H), 7.57 (t, J = 4 Hz, 6 H), 7.40-7.38(m, 9 H),

<sup>13</sup>C NMR (100 MHz, CDCl<sub>3</sub>): δ 134.00, 131.67, 128.57, 128.38, 124.00, 122.77, 90.51, 87.82.

### Reference

1. Chow, H-F.; Wan, C-W.; Low, K-H.; Yeung, Y-Y. *J. Org. Chem.* **2001**, *66*, 1910-1913.
2. Beeby, A.; Findlay, K.; Low, P.J.; Marder, T. B. *J. Am. Chem. Soc.* **2002**, *124*, 8280-8284
3. Urgaonkar, S.; Verkade, J. G. *J. Org. Chem.* **2004**, *69*, 5752-5755

4. He, H. Wu, *Tetrahedron*. **2004**, *45*, 3237-3239
5. Li, J-H.; Liang, Y.; Xie, Y-X. *J. Org. Chem.* **2005**, *70*, 4393–4396
6. Rubin, M.; Trofimov, A.; Gevorgyan, V. *J. Am. Chem. Soc.* **2005**, *127*, 10243–10249
7. Mino, T.; Shirae, Y. ; Saito, T.; Sakamoto, M.; Fujita, T. *J. Org. Chem.* **2006**, *71*, 9499-9502
8. Mao, J.; Xie, G.; Wu, M.; Guo, J.; Ji, S. *Adv. Synth. Catal.* **2008**, *350*, 2477
9. Saleh, S.; Picquet, M.; Meunier, P.; Hierso, J-C. *Tetrahedron*. **2009**, *65*, 7146-7150
10. Chen, H-J.; Lin, Z-Y.; Li, M-Y.; Lian, R-J.; Xue, Q-W.; Chung, J-L.; Chen, S-C.; Chen, Y-J. *Tetrahedron*. **2010**, *66*, 7755-7761.
11. Hu, H.; Yang, F.; Wu, Y. *J. Org. Chem.* **2013**, *78*, 10506–10511
12. Gallop, C. W. D.; Chen, M-T.; Navarro, O. *Org. Lett.* **2014**, *16*, 3724–3727
13. Lu, H.; Wang, L.; Yang, F.; Wu, R.; Shen, W. *RSC Adv.* **2014**, *4*, 30447-30452
14. Yang, Y.; Lim, J. F. Y.; Chew, X.; Robins, E. G.; Johannes, C.W.; Lima, Y. H.; Jong H. *Catal. Sci. Technol.* **2015**, *5*, 3501-3506.
15. Qian, L-W.; Sun, M.; Dong, J.; Xu, Q.; Zhou, Y.; Yin, S-F. *J. Org. Chem.* **2017**, *82*, 6764-6769
16. He, J.; Yang, K.; Zhao, J.; Cao, S. *Org. Lett.* **2019**, *21*, 9714–9718
17. Naveen, K.; Perumal, P. T.; Cho, D-H. *Org. Lett.* **2019**, *21*, 4350–4354
18. Martek, B. A. ; Gazvoda, M.; Urankar, D.; Kosmrlj, J. *Org. Lett.* **2020**, *22*, 4938–4943
19. Liang, L.; Niu, H-Y.; Li, R-L.; Wang, Y-F.; Yan, J-K. ; Li, C-G.; Guo, H-M. *Org. Lett.* **2020**, *22*, 68420-684
20. Arde, P.; Reddy, V. ; Anand, R. V. *RSC Adv.* **2014**, *4*, 49775-49779
21. Roberts, G. M.; Lua, W.; Woo; L. K. *RSC Adv.* **2015**, *5*, 18960-18971
22. Yang, Y.; Fen, J.; Lim, Y.; Chew, X.; Robins, E. G.; Johannes, C. W.; Lima, Y. H.; Jong, H. *Catal. Sci. Technol.*, **2015**, *5*, 3501-3506
23. Gurram, R. K. ; Rajesh, M., Reddy Singam, M. K. ; Nanubolu, J. B. ; Reddy, M. S.; *Organic Letters*, 2020, *22*, 5326-5330.
24. F. Shi, J. P. Waldo, Y. Chen, Richard C. Larock, *Organic Letters*, 2008, *10*, 2409-2412.

## 6: EDX, SEM and Powdered XRD of $\text{CuSeO}_3 \cdot 2\text{H}_2\text{O}$

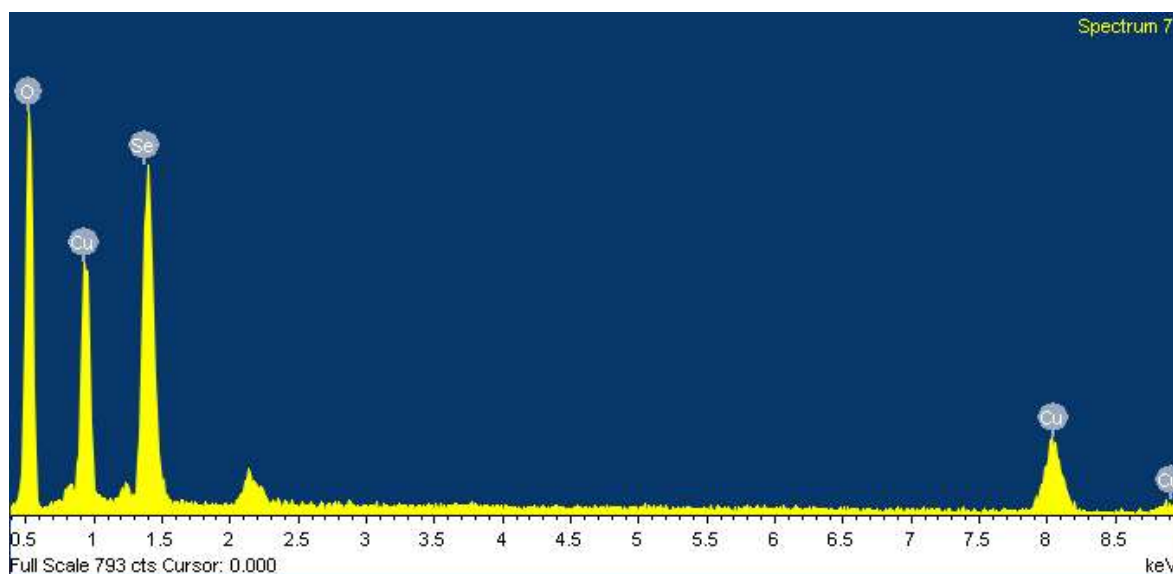

**Figure S1: EDXRF spectra of  $\text{CuSeO}_3 \cdot 2\text{H}_2\text{O}$  (EDX Sigma)**

**Table 5: EDXRF spectra of  $\text{CuSeO}_3 \cdot 2\text{H}_2\text{O}$  (EDX Sigma)**

| Element | App   | Intensity | Weight% | Weight% | Atomic% |
|---------|-------|-----------|---------|---------|---------|
|         | Conc. | Corrn.    |         | Sigma   |         |
| O K     | 34.83 | 1.2604    | 37.44   | 0.60    | 72.66   |
| Cu L    | 12.66 | 0.5983    | 28.68   | 0.59    | 14.02   |
| Se L    | 13.69 | 0.5471    | 33.88   | 0.58    | 13.32   |
|         |       |           |         |         |         |
| Totals  |       |           | 100.00  |         |         |

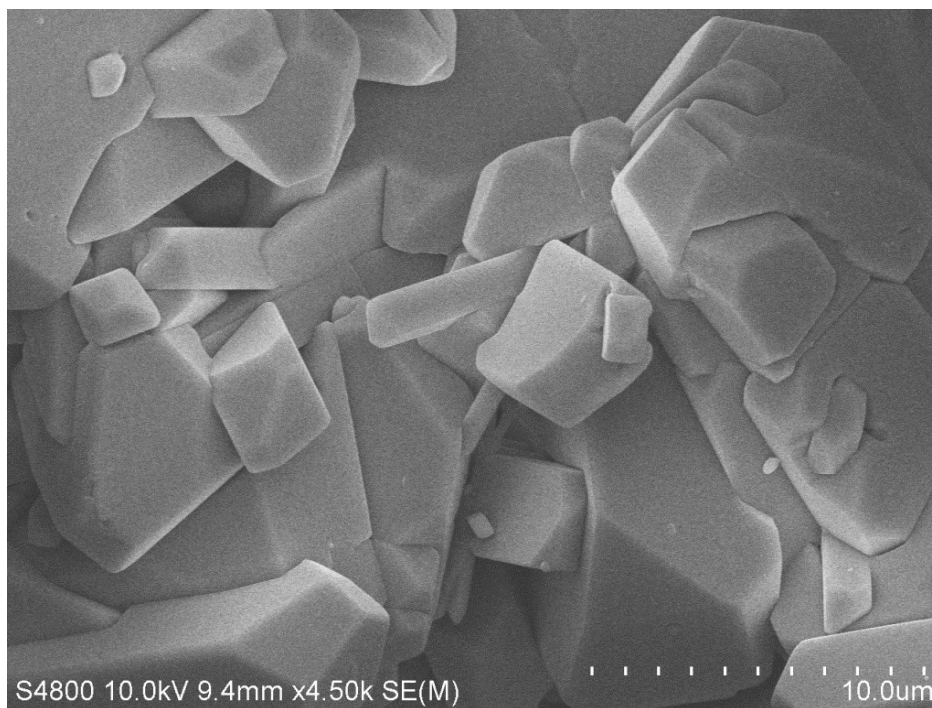

**Figure S2: Catalytic Surface of  $\text{CuSeO}_3 \cdot 2\text{H}_2\text{O}$  in FE-SEM (Sigma)**

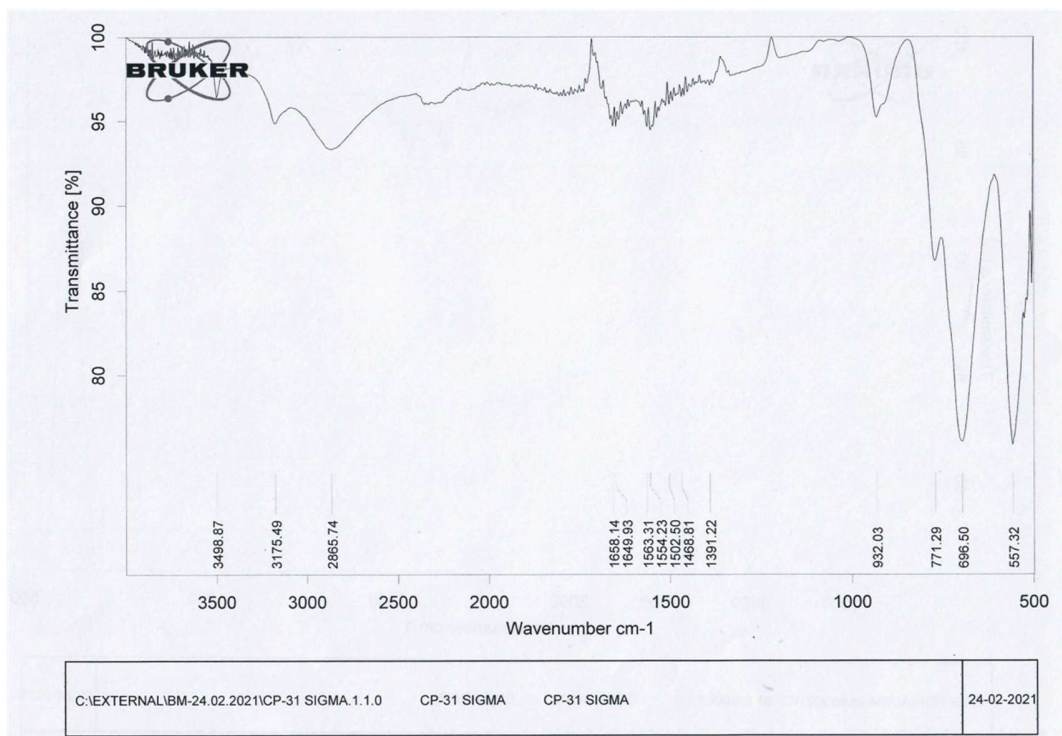

**Figure S3: IR of  $\text{CuSeO}_3 \cdot 2\text{H}_2\text{O}$  catalyst**

**IR characterization:** 3327  $\text{cm}^{-1}$  (O-H vibration), 1555  $\text{cm}^{-1}$  (Se-O stretching), 1429  $\text{cm}^{-1}$  (Se=O stretching), 671  $\text{cm}^{-1}$  (Cu-O stretching), 584  $\text{cm}^{-1}$  (Cu-O-Se stretching frequency).

**Reference:** a) R.J.M. Konings, A.S. Booij, A. Kovacs, *Chemical Physics Letters* **1998**, 292, 447–45; b) N. Dukstiene, L. Tatariskinaite, M. Andrulevicius, *Materials Science-Poland*, **2010**, 28, 93-103.

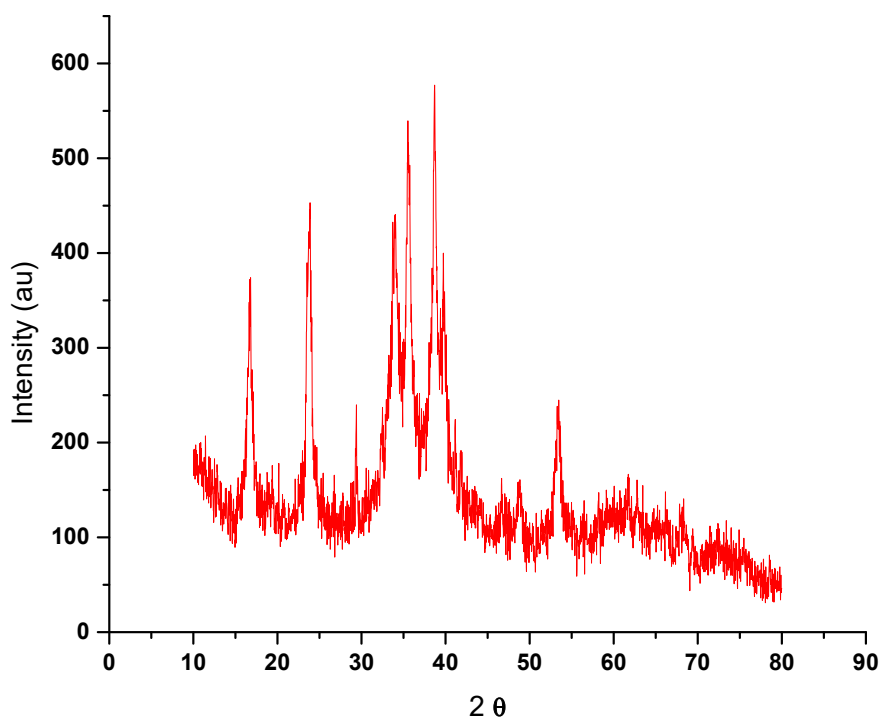

**Figure S4: Powder XRD of  $\text{CuSeO}_2 \cdot 2\text{H}_2\text{O}$  catalyst (Sigma)**

The X-ray diffraction analysis has been used to study the crystal structure of materials. The powder XRD patterns at room temperature were recorded by using Rigaku model TTRX-III equipped with rotating anode-based  $\text{Cu-K}\alpha$  radiation ( $\lambda = 1.5418 \text{ \AA}$ ). X-ray diffractometer was operating at 100mA and 50kV. XRD machine was operated with the following conditions: (i)  $2\theta$ - $\theta$  scanning mode, (ii) fixed monochromator (iii) continuous scanning, and (iv) measurement angle between  $10$ - $80^\circ$  with  $0.02^\circ$  step.

## 7. ICP- AES study

ICP-AES (Inductively Coupled Plasma- Atomic Emission Spectrometry) analysis was carried out at Bhabha Atomic Research Centre (BARC), Trombay, with a Spectro-Arcos SOP unit, Germany. The spectrometer is augmented with a CCD detector array which was used for the analyses. High purity argon plasma was used as the plasma gas, carrier gas and auxiliary gas as well. To establish the calibration curves for the analyses, ICP standard solution purchased from MERCK was used. All measurements were done in triplicate. High pure Ar gas (total flow rate of 12 liters per minute) was also used for flushing of the detector before all the measurements to minimize the background. The detector set consists of thermally stabilized linear arrays of CCD detectors (3648 pixels/array). The detection limits are mentioned in the individual figures itself for each spectral line for easy ref. There are five analytical lines of 'Pd' available in the instrumental library on which measurements were done. All the samples were dissolved in 1M nitric acid (prepared from AR grade, Merck).

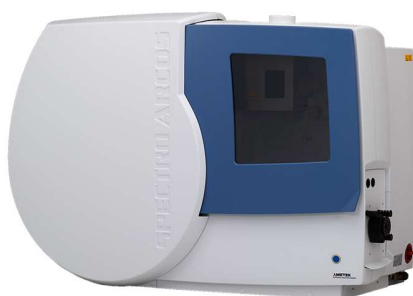

**Figure S5:** ICP-AES (Inductively Coupled Plasma- Atomic Emission Spectrometry) analysis was carried out at Bhabha Atomic Research Centre (BARC), Trombay, with a Spectro-Arcos SOP unit, Germany.

### Procedure:

All experiments were repeated thrice for consistency of result. All analytes were dissolved in minimum quantity of 1M HNO<sub>3</sub> (prepared from AR grade, Merck) under IR lamp. ICP standard of Pd(NO<sub>3</sub>)<sub>2</sub> solution purchased from Merck was used as control. The analytes were fed directly into the ICP after digestion with 1M HNO<sub>3</sub>. Calibration curves were established for the ICP standard of Pd(NO<sub>3</sub>)<sub>2</sub> solution after which the actual samples were run. There are 5 analytical lines (229.651, 324.270, 340.458, 344.140, 360.955 for palladium). The spectrometer can detection up to 0.2 ppm (200 ppb). All the four analytes showed no palladium impurity up to 0.2 ppm (200 ppb).



**References:**

(20) For ICP-OES Analysis See: Morrison, C.; Sun, H.; Yao, Y.; Loomis, R. A.; Buhro, W. E.; Methods for the ICP-OES Analysis of Semiconductor Materials. *Chem. Mater.* **2020**, 32, 1760–1768;

**Instrumentation Details for ICP-OES/AES**

**Table 6. Instrumentation Details. ICP-AES spectrometer Spectro-Arcos SOP, Germany. Version 2.0.0.22336 software.**

|                |            |
|----------------|------------|
| Gas Flow       |            |
| Plasma         | 15 L/min   |
| Auxiliary      | 0.2 L/min  |
| Nebulizer      | 0.70 L/min |
| RF Power       | 1300 Watts |
| Pump Flow Rate | 1.5 mL/min |

|                 |                          |
|-----------------|--------------------------|
| Spectrometer    |                          |
| Resolution      | High (0.0035 nm)         |
| Read Time (sec) | Min 5; Max 20            |
| Delay Time      | 60                       |
| Replicates      | 3                        |
| Calibration     | Hg Realignment at 253 nm |

|                            |                       |
|----------------------------|-----------------------|
| Plasma                     |                       |
| Conditions                 | Same for all elements |
| Plasma View                | Axial                 |
| Source Equilibration Delay | 15 sec                |

|                  |             |
|------------------|-------------|
| Peristaltic Pump |             |
| Sample Flow Rate | 1.50 mL/min |
| Flush Time       | 60 sec      |

**8. Mechanism Study by Computational DFT Study**

All the calculations were performed by using Gaussian 09<sup>1</sup>. We optimized all the structure at meta-GGA M06L<sup>2</sup>-level, with Lanl2dz<sup>3</sup> basis set. Effective core potentials were applied for copper, selenium, iodine and potassium atoms. Extra d orbitals were included in the basis set for the selenium and iodine atoms. All the optimized structures were confirmed as the energetically minimized structures by the analytical frequency calculations with no imaginary value. Single-

point electronic energies were generated for all optimized structures at M06-2X<sup>4</sup> level with SDD<sup>5</sup> for heavy atoms (Cu, Se, I and K) and 6-311+G(2d,p) basis set was used small atoms. The solvent effect of the reaction was considered by calculating the single-point energies through the SMD<sup>6</sup> model at M062X/SDD (Cu, Se, I and K)/6-311+G(2d,p) level. Dimethylformamide was used as a solvent. All the energy calculations were performed at a temperature of 363.15 K. The final free energies were calculated as

$$G = E_{M062X/SDD/6-311G(2d,p)} + G_{\text{corr}} + \Delta G_{\text{sol}} (G_{\text{sol}} - G_{\text{g}})$$

The free energy correction ( $G_{\text{corr}}$ ) was taken at M06L/Lan12dz level. The  $\Delta G_{\text{sol}}$  is the difference in the free energies between the solvent phase to the gas phase at M062X/SDD/6-311+G(2d, p).

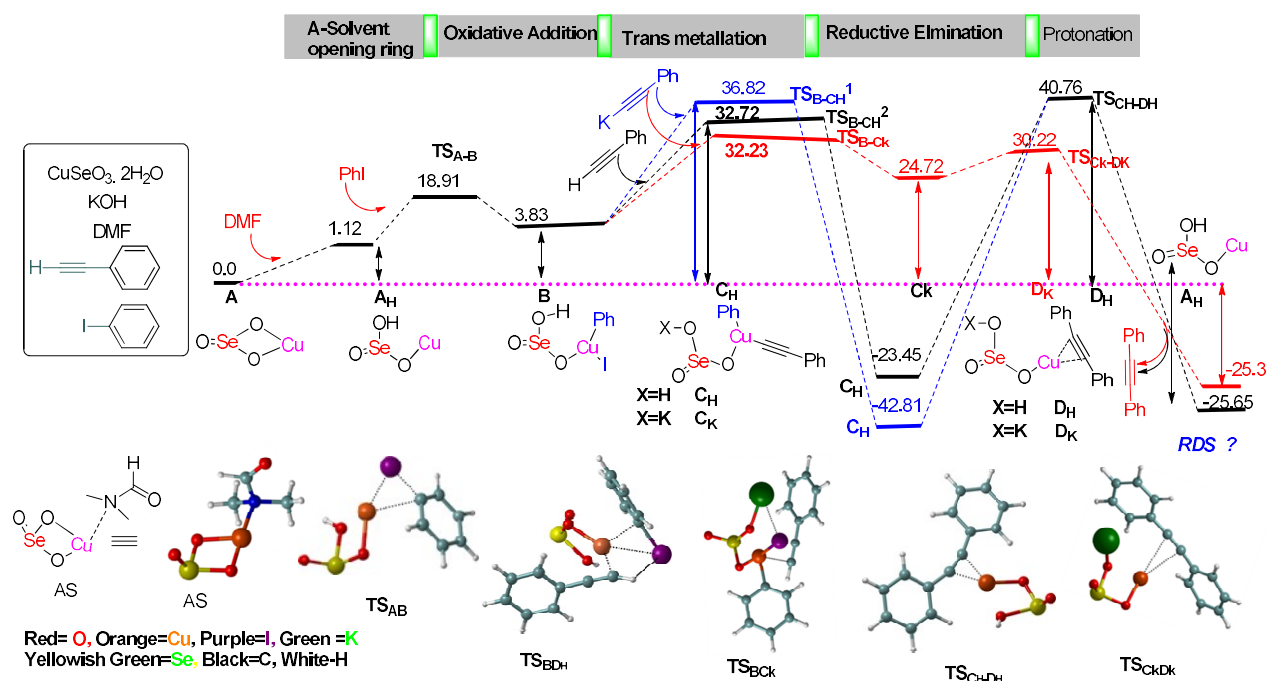

**Figure S6:** Free energy profile for CuSeO<sub>3</sub>·2H<sub>2</sub>O mediated Sonogashira cross-coupling reaction using DFT Study

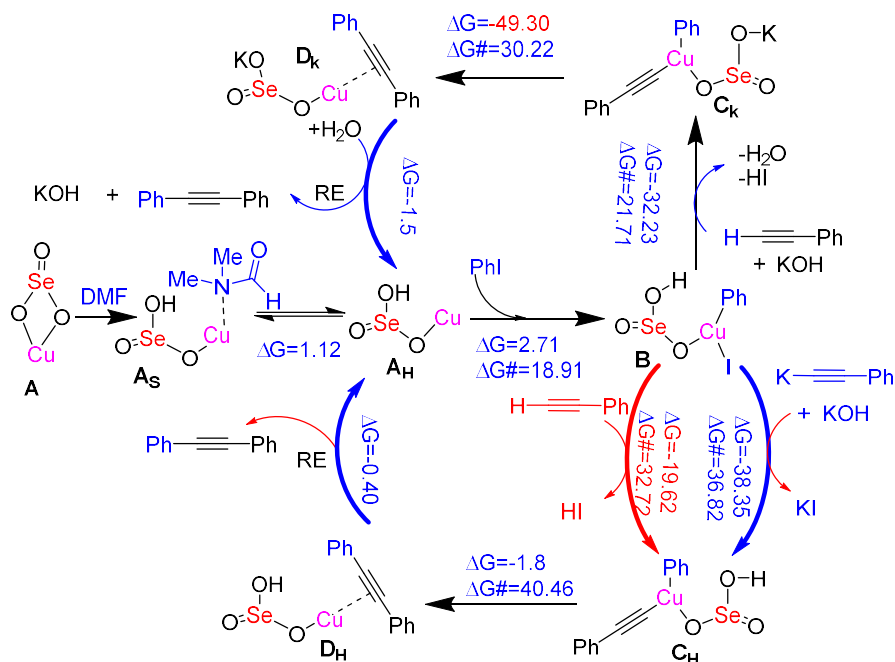

**Figure S7: Plausible mechanism for  $\text{CuSeO}_3 \cdot 2\text{H}_2\text{O}$  mediated Sonogashira cross-coupling reaction using DFT**

DMF is believed to open the [Se-O-Cu] bridge of  $\text{CuSeO}_3 \cdot 2\text{H}_2\text{O}$  **A** at an initial stage forming precursor complex **B** by forming solvated complex **AH** with ( $\Delta G_{\text{A-AH}}=1.12$  Kcal/Mol) (Figure 3).<sup>23-28</sup> The precursor complex **AH** undergoes oxidative addition of iodobenzene to generate successor complex **B** with ( $\Delta G_{\text{A-AH}}=2.71$  Kcal/mol) through transition state  $\text{TS}_{\text{AH-B}}$  ( $\Delta G^\ddagger=18.91$  Kcal/mol). The complex **B** could then undergo transmetalation with phenyl acetylene by two possible pathways. In the first pathway potassium plays the counter ion role. Complex **B** is transformed to **C<sub>k</sub>** (K=potassium) with a free energy of 21.71 kcal/mol through transition state  $\text{TS}_{\text{BCK}}^\ddagger=32.23$ ; Whereas subsequent reductive elimination of **C<sub>k</sub>** results in formation of stable intermediate **D<sub>k</sub>** ( $\Delta G^\ddagger=-25.3$  Kcal/mol) and diaryl acetylene product leaving **A<sub>H</sub>** metal complex through transition. state  $\text{TS}_{\text{CKD}}^\ddagger=30.22$  Kcal/mol. Alternatively; complex **B** is transformed to **C<sub>H</sub>** (H=hydrogen) via two ways; with free energy -23.72 Kcal/mol with transmetalation of phenylacetylene through transition state  $\text{TS}_{\text{BCH}}^{\ddagger 1}=36.82$  Kcal/ mol or with free energy -42.81 Kcal/mol with transmetalation of the potassium salt of phenyl acetylene through transition state  $\text{TS}_{\text{BCH}}^{\ddagger 2}=32.72$  Kcal/mol to give the final complex **C<sub>H</sub>**. whereas subsequent reductive elimination of **C<sub>H</sub>** results in formation of the stable intermediate **A<sub>H</sub>** ( $\Delta G^\ddagger=-25.65$  Kcal/mol) and diarylacetylene product leaving **A<sub>H</sub>** metal complex through transition state  $\text{TS}_{\text{CH-DH}}^\ddagger=40.46$  Kcal/mol. As per the reduction potential data, both oxidative addition, transmetalation and reductive elimination was

supposed to occur at the copper centre assisted by the selenium metal.<sup>17-18</sup> The mechanism of A-A<sub>S</sub>-A<sub>H</sub>-B to C<sub>K</sub>-D<sub>K</sub> (activation barriers 21 and 30 kcal/mol) is more plausible in comparison to C<sub>H</sub>-D<sub>H</sub> (36 and 40 kcal/mol) activation barriers 36 and 40 kcal/mol. The activation energy barrier value is agreeing with experimental findings that correspond to relatively longer reaction time at 90 °C.

## References

- (1) Frisch, M.J.; Trucks, G.W.; Schlegel, H.B.; Scuseria, G.E.; Robb, M.A.; Cheeseman, J.R.; Scalmani, G.; Barone, V.; Mennucci, B.; Petersson, G.A.; Nakatsuji, H.; Caricato, M.; Li, X.; Hratchian, H.P.; Izmaylov, A.F.; Bloino, J.; Zheng, G.; Sonnenberg, J.L.; Hada, M.; Ehara, M.; Toyota, K.; Fukuda, R.; Hasegawa, J.; Ishida, M.; Nakajima, T.; Honda, Y.; Kitao, O.; Nakai, H.; Vreven, T.; Montgomery, J.A., Jr.; Peralta, J.E.; Ogliaro, F.; Bearpark, M.; Heyd, J.J.; Brothers, E.; Kudin, K.N.; Staroverov, V.N.; Kobayashi, R.; Normand, J.; Raghavachari, K.; Rendell, A.; Burant, J.C.; Iyengar, S.S.; Tomasi, J.; Cossi, M.; Rega, N.; Millam, N.J.; Klene, M.; Knox, J.E.; Cross, J.B.; Bakken, V.; Adamo, C.; Jaramillo, J.; Gomperts, R.; Stratmann, R.E.; Yazyev, O.; Austin, A. J.; Cammi, R.; Pomelli, C.; Ochterski, J. W.; Martin, R.L.; Morokuma, K.; Zakrzewski, V.G.; Voth, G.A.; Salvador, P.; Dannenberg, J.J.; Dapprich, S.; Daniels, A.D.; Farkas, Ö.; Foresman, J.B.; Ortiz, J.V.; Cioslowski, J.; Fox, D.J. Gaussian 09, Revision C.01, Gaussian, Inc., Wallingford CT, 2009.
- (2) Zhao, Y.; Truhlar, D. G. A new local density functional for main-group thermochemistry, transition metal bonding, thermochemical kinetics, and noncovalent interactions; *J. Chem. Phys.* **2006**, *125*, 194101.
- (3) Hay, P. J.; Wadt, W.R. *Ab initio* effective core potentials for molecular calculations. Potentials for the transition metal atoms Sc to H. *J. Chem. Phys.* **1985**, *82*, 270.
- (4) Zhao, Y.; Truhlar, D.G. The M06 suite of density functionals for main group thermochemistry, thermochemical kinetics, noncovalent interactions, excited states, and transition elements: two new functionals and systematic testing of four M06-class functionals and 12 other functional, *Theoretical Chemistry Accounts* **2008**, *120*, 215-241.
- (5) Andrae, D.; Häußermann, U.; Dolg, M.; Stoll, H.; Preuß, H. Energy-adjusted *ab initio* pseudopotentials for the second and third row transition elements. *Theoretica chimica acta* **1990**, *77*, 123-141.
- (6) Marenich, A. V.; Cramer, C. J.; Truhlar, D. G. Universal Solvation Model Based on Solute Electron Density and on a Continuum Model of the Solvent Defined by the Bulk Dielectric Constant and Atomic Surface Tensions *J. Phys. Chem. B* **2009**, *113*, 6378–6396

## 9: Cartesian Co-ordinates used for DFT Study:

a

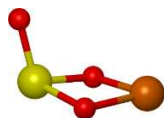

|    |             |             |             |
|----|-------------|-------------|-------------|
| O  | 0.03772000  | -0.33901100 | 1.22594600  |
| O  | 0.03772000  | -0.33901100 | -1.22594600 |
| O  | 0.03772000  | 2.19465300  | 0.00000000  |
| Cu | -1.03163400 | -1.31637600 | 0.00000000  |
| Se | 0.85329700  | 0.76593700  | 0.00000000  |

DMF

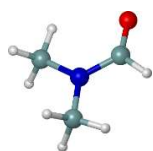

|   |             |             |             |
|---|-------------|-------------|-------------|
| N | -0.35428000 | -0.01792000 | -0.00020000 |
| C | -0.40854700 | 1.44329500  | 0.00001800  |
| H | -0.93027500 | 1.80995600  | 0.89013700  |
| H | 0.61563900  | 1.81619400  | -0.00027800 |
| H | -0.93067900 | 1.81017500  | -0.88978600 |
| C | -1.61409400 | -0.75309500 | 0.00009400  |
| H | -1.40967700 | -1.82617400 | 0.00011800  |
| H | -2.20832500 | -0.51168300 | 0.88803100  |
| H | -2.20861500 | -0.51181300 | -0.88767300 |
| C | 0.85837600  | -0.66692000 | -0.00011800 |
| H | 0.73467600  | -1.76373100 | -0.00012800 |
| O | 1.97535100  | -0.10464500 | 0.00012700  |

DMF-H

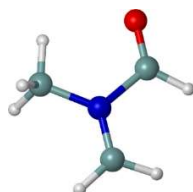

|   |             |             |             |
|---|-------------|-------------|-------------|
| N | 0.47894800  | -0.08979000 | -0.00016100 |
| C | 0.60862700  | 1.39872000  | 0.00003300  |
| H | 1.14861400  | 1.71044700  | -0.89171800 |
| H | -0.39292400 | 1.82171400  | -0.00417100 |
| H | 1.14084300  | 1.71073800  | 0.89640400  |
| C | 1.48430200  | -0.90939400 | -0.00000500 |
| H | 1.31377500  | -1.98162000 | -0.00014400 |
| H | 2.50269800  | -0.53949700 | 0.00016300  |

|   |             |             |             |
|---|-------------|-------------|-------------|
| C | -0.93667600 | -0.66062400 | 0.00009400  |
| H | -0.92950700 | -1.75457200 | 0.00048800  |
| O | -1.88420700 | 0.08613900  | -0.00007800 |

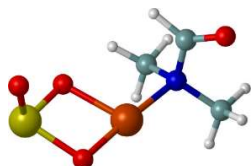

|    |             |             |             |
|----|-------------|-------------|-------------|
| O  | -0.75030500 | -0.35993200 | -1.02801600 |
| O  | -1.27357800 | -0.22454700 | 1.36435600  |
| O  | -2.80083900 | 1.41189800  | -0.33430600 |
| Cu | 0.40751500  | -0.22933200 | 0.56239900  |
| Se | -2.32708300 | -0.15474200 | -0.13010200 |
| N  | 2.28294800  | -0.24195200 | -0.22270300 |
| C  | 3.31864500  | -0.67190700 | 0.76740800  |
| H  | 4.30447300  | -0.70510900 | 0.29502500  |
| H  | 3.35021400  | 0.04526700  | 1.58597700  |
| H  | 3.05833700  | -1.66200400 | 1.14146000  |
| C  | 2.17379100  | -1.14793400 | -1.42002800 |
| H  | 1.32919900  | -0.82756700 | -2.03173400 |
| H  | 3.10470500  | -1.12836800 | -1.99369200 |
| H  | 1.97918400  | -2.16261400 | -1.07432000 |
| C  | 2.35006900  | 1.16862400  | -0.57566400 |
| H  | 1.72680700  | 1.39926200  | -1.45063700 |
| O  | 3.00151300  | 1.99182300  | 0.06927200  |

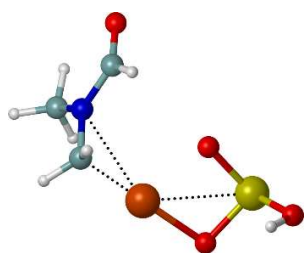

|    |             |             |             |
|----|-------------|-------------|-------------|
| O  | 3.18811600  | 0.62573300  | 0.95313300  |
| O  | 1.70379100  | -1.16922700 | -0.57917900 |
| O  | 0.48080800  | 0.88205400  | 0.28037900  |
| Cu | -0.15976400 | -1.14192400 | 0.17872600  |
| Se | 2.00330700  | 0.52087200  | -0.42910800 |
| N  | -2.69289000 | -0.07268600 | 0.14896100  |
| C  | -3.36066000 | -0.40423000 | -1.11580600 |
| H  | -4.15930000 | -1.12890900 | -0.94069500 |
| H  | -3.77790000 | 0.51287100  | -1.52877800 |
| H  | -2.64024300 | -0.82994100 | -1.82107900 |
| C  | -1.99883100 | -1.09797700 | 0.86541900  |

|   |             |             |             |
|---|-------------|-------------|-------------|
| H | -1.88617900 | -0.84509900 | 1.92431100  |
| H | -2.46220600 | -2.07803500 | 0.72035100  |
| H | 2.91483600  | 0.10275800  | 1.74047200  |
| C | -2.63891000 | 1.25855800  | 0.56540900  |
| H | -2.05662600 | 1.38432700  | 1.48716900  |
| O | -3.19409200 | 2.19380100  | -0.04283400 |

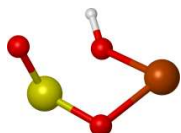

|    |             |             |             |
|----|-------------|-------------|-------------|
| O  | 0.35499600  | 1.30152700  | -0.40122900 |
| O  | 0.13791300  | -1.21719100 | -0.15434000 |
| O  | -1.80648600 | 0.25706600  | 1.19725600  |
| Cu | 1.71173200  | -0.05678300 | 0.15570700  |
| Se | -1.15538700 | -0.09777600 | -0.27782500 |
| H  | 0.15156900  | 2.23986600  | -0.20295200 |

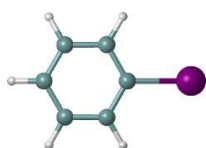

|   |             |             |             |
|---|-------------|-------------|-------------|
| C | -0.57168100 | 0.00002600  | -0.00000400 |
| C | -1.26001000 | 1.22335300  | -0.00000200 |
| C | -1.25999100 | -1.22334500 | 0.00000000  |
| C | -2.66447400 | 1.21366900  | 0.00000400  |
| H | -0.71968200 | 2.16352400  | -0.00000100 |
| C | -2.66442800 | -1.21369400 | 0.00000200  |
| H | -0.71959400 | -2.16347500 | 0.00000100  |
| C | -3.36827300 | -0.00001100 | -0.00000200 |
| H | -3.20206200 | 2.15632500  | 0.00000200  |
| H | -3.20203700 | -2.15633700 | 0.00000000  |
| H | -4.45300200 | -0.00004900 | 0.00000200  |
| I | 1.56659500  | 0.00000000  | 0.00000000  |

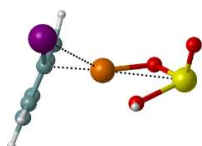

|    |             |             |             |
|----|-------------|-------------|-------------|
| O  | -1.55694600 | -0.24253000 | 1.32194400  |
| O  | -3.25615800 | -1.56380600 | -0.53770700 |
| O  | -2.21126200 | 1.00453200  | -0.75019200 |
| Cu | -0.36891700 | 0.61061900  | -0.13225200 |

|    |             |             |             |
|----|-------------|-------------|-------------|
| C  | 1.68865000  | 0.45699800  | 0.02267800  |
| C  | 1.36934200  | 1.19331700  | -1.17384100 |
| C  | 2.08136600  | 1.16104800  | 1.19788900  |
| C  | 1.85245000  | 3.28083100  | 0.00507100  |
| C  | 1.47063000  | 2.61079100  | -1.15541200 |
| C  | 2.15160100  | 2.55371200  | 1.17975800  |
| I  | 1.96381700  | -1.64927900 | -0.07645400 |
| H  | 1.23676500  | 0.67680000  | -2.11870500 |
| H  | 1.24930000  | 3.15871600  | -2.06283500 |
| H  | 1.92647700  | 4.36085400  | 0.00654300  |
| H  | 2.44592500  | 3.07916700  | 2.07997400  |
| H  | 2.32827800  | 0.60927700  | 2.09652700  |
| Se | -3.19453100 | -0.06539100 | 0.15713900  |
| H  | -1.44573200 | -1.08344900 | 1.81393100  |

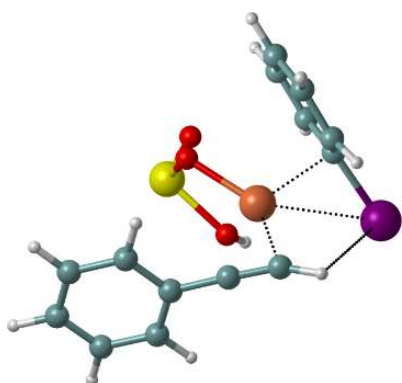

|    |             |             |             |
|----|-------------|-------------|-------------|
| O  | -1.04509500 | 1.44721700  | 0.61116700  |
| O  | -0.50457900 | -0.04701800 | -1.36568800 |
| O  | -0.20739200 | 2.75338700  | -1.71393000 |
| Cu | 0.01412500  | -0.30405000 | 0.76510800  |
| C  | 2.32898100  | 0.32648500  | 0.41610800  |
| C  | 2.23756600  | 1.58778100  | -0.20323600 |
| C  | 2.07424200  | 0.18440900  | 1.80598500  |
| C  | 1.66728800  | 2.58621900  | 1.94490200  |
| C  | 1.90297100  | 2.70853400  | 0.56665400  |
| C  | 1.74991700  | 1.33332000  | 2.56076800  |
| C  | -0.32185400 | -2.20660000 | 1.47944600  |
| C  | -1.46448300 | -1.85881400 | 1.10411400  |
| C  | -2.76840500 | -1.50079100 | 0.64419600  |
| C  | -3.24724600 | -2.00094500 | -0.58924900 |
| C  | -3.57381500 | -0.61500500 | 1.39764500  |
| C  | -4.51438200 | -1.63045000 | -1.04782400 |
| C  | -4.83978700 | -0.25318100 | 0.93107600  |
| C  | -5.31468200 | -0.75939300 | -0.29024100 |
| H  | 2.38586300  | 1.69659800  | -1.26952100 |
| H  | 1.78869100  | 3.66192200  | 0.06882600  |
| H  | 1.39488100  | 3.45752000  | 2.52650400  |



|    |             |             |             |
|----|-------------|-------------|-------------|
| H  | 1.56095800  | 1.22696400  | 3.62237800  |
| H  | 2.23115400  | -0.76735200 | 2.30044100  |
| H  | -2.61372100 | -2.65432200 | -1.17651200 |
| H  | -4.87570700 | -2.01378000 | -1.99456400 |
| H  | -6.29496700 | -0.47177800 | -0.65221300 |
| H  | -5.45074300 | 0.42826500  | 1.51058900  |
| H  | -3.18673200 | -0.20397000 | 2.32205600  |
| Se | -1.32896000 | 1.71769800  | -1.05203200 |
| H  | 0.40424100  | -2.86369100 | 1.91200700  |
| I  | 2.94290700  | -1.35078000 | -0.71639200 |
| H  | 0.01568100  | -0.12740500 | -2.19471100 |

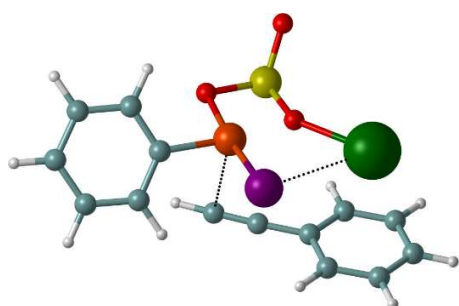

|    |             |             |             |
|----|-------------|-------------|-------------|
| O  | -1.29432000 | -2.16094500 | 0.16566300  |
| O  | 0.87162000  | -1.19695500 | -0.59637400 |
| O  | 0.31973800  | -3.75577200 | -1.48630500 |
| Cu | -0.85426200 | -0.32116600 | -0.19535000 |
| C  | -2.65844800 | 0.22431600  | 0.30187300  |
| C  | -3.66244400 | -0.58760600 | -0.23177400 |
| C  | -2.92709400 | 1.24762200  | 1.21705800  |
| C  | -5.28859400 | 0.65349200  | 1.09589000  |
| C  | -4.99126000 | -0.36074800 | 0.17339800  |
| C  | -4.26118300 | 1.44865100  | 1.62284400  |
| C  | -0.14639200 | -0.30452700 | 2.64050500  |
| C  | 0.96043700  | 0.06071100  | 2.26488100  |
| C  | 2.25108900  | 0.44770200  | 1.79595900  |
| C  | 2.53736700  | 1.79708100  | 1.48133000  |
| C  | 3.26406300  | -0.52657800 | 1.62092400  |
| C  | 3.80228500  | 2.15839800  | 0.99539100  |
| C  | 4.52735000  | -0.15901300 | 1.14119100  |
| C  | 4.80222800  | 1.18473500  | 0.82209500  |
| H  | -3.42051000 | -1.40550900 | -0.90075200 |
| H  | -5.78051000 | -0.98938600 | -0.22526200 |
| H  | -6.31509500 | 0.82304800  | 1.40214600  |
| H  | -4.48470500 | 2.23549400  | 2.33593100  |
| H  | -2.13845300 | 1.88220900  | 1.60681800  |
| H  | 1.76520800  | 2.54415000  | 1.61550500  |
| H  | 4.01216100  | 3.19809400  | 0.77262100  |
| H  | 5.78841200  | 1.47188000  | 0.47475900  |

|    |             |             |             |
|----|-------------|-------------|-------------|
| H  | 5.29985100  | -0.91158700 | 1.03229300  |
| H  | 3.04631500  | -1.55875000 | 1.86724000  |
| Se | 0.35322400  | -2.84916600 | -0.09514600 |
| H  | -1.11031500 | -0.63644600 | 2.95053400  |
| I  | -0.39923300 | 2.02937600  | -1.11735100 |
| K  | 2.56990800  | 0.27259500  | -1.63817800 |

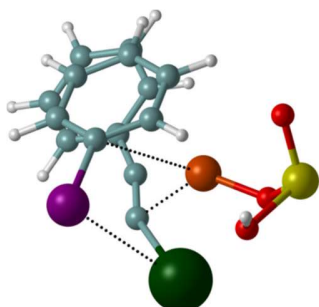

|    |             |             |             |
|----|-------------|-------------|-------------|
| O  | -1.02068500 | 2.48628800  | 0.62874100  |
| O  | -3.23354000 | 1.09774100  | 0.31257000  |
| O  | -2.03067000 | 2.25821000  | -1.95334300 |
| Cu | 0.57540200  | 1.41549100  | 0.58295400  |
| C  | -0.36328800 | -1.75243200 | -0.93124400 |
| C  | -0.66607500 | -0.50115100 | -1.48450300 |
| C  | 0.93995600  | -2.27451600 | -0.97065700 |
| C  | 1.66140000  | -0.28046800 | -2.17116300 |
| C  | 0.35876100  | 0.23574500  | -2.10795400 |
| C  | 1.94904400  | -1.52795300 | -1.59579400 |
| C  | 1.16494400  | 0.01641500  | 1.91012400  |
| C  | 2.22823300  | 0.29423700  | 1.23754000  |
| C  | 3.57745100  | 0.26338700  | 0.73782800  |
| C  | 4.48427900  | -0.71793300 | 1.20932800  |
| C  | 4.02460900  | 1.17635100  | -0.24482800 |
| C  | 5.78641000  | -0.78458000 | 0.70177200  |
| C  | 5.32746500  | 1.10540500  | -0.74986800 |
| C  | 6.21530500  | 0.12244000  | -0.28186800 |
| H  | -1.66717000 | -0.08652400 | -1.46247400 |
| H  | 0.09500700  | 1.19231700  | -2.54584000 |
| H  | 2.44988600  | 0.28178000  | -2.65783700 |
| H  | 2.96165300  | -1.91612300 | -1.61920100 |
| H  | 1.17045700  | -3.23197000 | -0.51939500 |
| H  | 4.14925600  | -1.41939600 | 1.96504300  |
| H  | 6.46847500  | -1.54236600 | 1.07209500  |
| H  | 7.22455400  | 0.06674300  | -0.67400500 |
| H  | 5.65222000  | 1.81487500  | -1.50341200 |
| H  | 3.33400700  | 1.93359300  | -0.60839000 |
| Se | -2.38032400 | 2.70506900  | -0.39477900 |
| I  | -1.90842900 | -2.88009700 | -0.01779000 |

|   |             |            |             |
|---|-------------|------------|-------------|
| H | -3.92378400 | 0.76066800 | -0.29830400 |
| K | -1.70396300 | 0.14644000 | 2.25554800  |

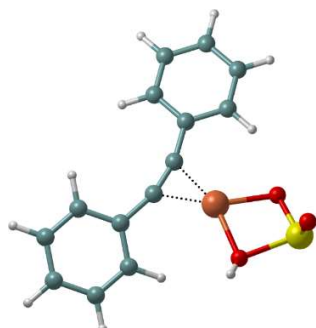

|    |             |             |             |
|----|-------------|-------------|-------------|
| O  | 2.36483500  | -0.08576300 | -0.36973400 |
| O  | 1.09374700  | -2.23960900 | -0.15441800 |
| O  | 3.43513600  | -1.89332600 | 1.45890200  |
| Cu | 0.40336300  | -0.32658700 | -0.13915200 |
| C  | -0.44612500 | 2.59796400  | -0.02403000 |
| C  | 0.92153300  | 2.95177300  | -0.07257300 |
| C  | -1.42975400 | 3.61528800  | 0.04241900  |
| C  | 0.31522000  | 5.30554100  | 0.01342600  |
| C  | 1.29269600  | 4.29985000  | -0.05372500 |
| C  | -1.04541400 | 4.95863100  | 0.06032100  |
| C  | -0.86044500 | 1.22404700  | -0.03384600 |
| C  | -1.54916700 | 0.16049400  | -0.04340500 |
| C  | -2.63500800 | -0.77748300 | -0.00928000 |
| C  | -3.90631800 | -0.36177200 | 0.45585700  |
| C  | -2.46032500 | -2.11299200 | -0.43928000 |
| C  | -4.97216400 | -1.26584000 | 0.48348500  |
| C  | -3.53305300 | -3.00871600 | -0.40943400 |
| C  | -4.79124000 | -2.59018000 | 0.05216300  |
| H  | 1.67336200  | 2.16817400  | -0.12401800 |
| H  | 2.34229000  | 4.56564600  | -0.08923500 |
| H  | 0.60899800  | 6.34858200  | 0.02877500  |
| H  | -1.80168700 | 5.73340600  | 0.11149900  |
| H  | -2.47871000 | 3.34199400  | 0.07633500  |
| H  | -4.04190800 | 0.65991000  | 0.79290900  |
| H  | -5.94185700 | -0.94032600 | 0.84156200  |
| H  | -5.62142500 | -3.28635500 | 0.07542500  |
| H  | -3.39145900 | -4.02882800 | -0.74673400 |
| H  | -1.48468700 | -2.42565800 | -0.80193300 |
| Se | 3.03015200  | -1.64394800 | -0.12222600 |
| H  | 0.86204600  | -3.00133900 | 0.41592800  |

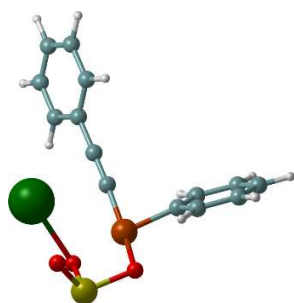

|    |             |             |             |
|----|-------------|-------------|-------------|
| O  | 2.83426500  | 0.20169300  | 0.07522200  |
| O  | 1.50127400  | -1.58694200 | -1.05891600 |
| O  | 2.66438900  | -2.33747000 | 1.22586500  |
| Cu | 0.99909200  | 0.26736300  | -0.53502600 |
| C  | 0.72085200  | 2.14059400  | -0.11604300 |
| C  | 1.49762100  | 2.58984900  | 0.95511300  |
| C  | -0.04947600 | 2.99608600  | -0.90821800 |
| C  | 0.78310600  | 4.86049000  | 0.42255000  |
| C  | 1.52566600  | 3.97264900  | 1.21564900  |
| C  | 0.00490100  | 4.37660600  | -0.63917700 |
| C  | -0.86822300 | 0.11215000  | -0.47893500 |
| C  | -2.08681000 | -0.06914700 | -0.32198300 |
| C  | -3.48882700 | -0.29138200 | -0.14090300 |
| C  | -4.13094200 | 0.13705900  | 1.04727300  |
| C  | -4.26181300 | -0.94103300 | -1.13376100 |
| C  | -5.50025700 | -0.08051100 | 1.23306100  |
| C  | -5.63146500 | -1.15312100 | -0.94103300 |
| C  | -6.25640300 | -0.72708400 | 0.24216700  |
| H  | 2.11044200  | 1.90069900  | 1.52598800  |
| H  | 2.13883400  | 4.34499300  | 2.02944800  |
| H  | 0.80932800  | 5.92391000  | 0.63306300  |
| H  | -0.57195700 | 5.05973500  | -1.25338800 |
| H  | -0.67355300 | 2.61456200  | -1.70642500 |
| H  | -3.54707600 | 0.64905900  | 1.80407900  |
| H  | -5.97892300 | 0.25831600  | 2.14499000  |
| H  | -7.31788700 | -0.89134700 | 0.38731700  |
| H  | -6.21183600 | -1.64664700 | -1.71235200 |
| H  | -3.77831700 | -1.26186400 | -2.04968700 |
| Se | 3.07744000  | -1.54668500 | -0.20770200 |
| K  | -0.00698400 | -2.62500600 | 0.85382500  |

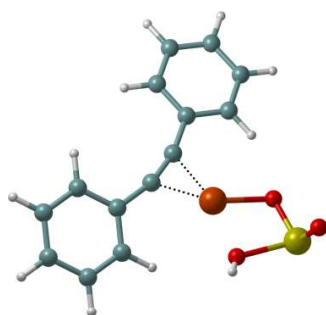

|    |             |             |             |
|----|-------------|-------------|-------------|
| O  | -2.31952300 | 0.31685500  | -0.34291800 |
| O  | -0.84796800 | 2.33932000  | -0.15042800 |
| O  | -3.23259300 | 2.24781300  | 1.44305800  |
| Cu | -0.33569900 | 0.37646700  | -0.11564300 |
| C  | 0.15235700  | -2.62049200 | -0.01105500 |
| C  | -1.24805400 | -2.78268800 | -0.11807900 |
| C  | 0.98207100  | -3.76350700 | 0.09759500  |
| C  | -0.97766800 | -5.19692300 | -0.01693900 |
| C  | -1.80263700 | -4.06603400 | -0.12182500 |
| C  | 0.41396000  | -5.04083300 | 0.09396200  |
| C  | 0.74549100  | -1.31285300 | -0.01235600 |
| C  | 1.55015400  | -0.33490100 | -0.02321500 |
| C  | 2.73072200  | 0.48058700  | -0.00496000 |
| C  | 3.95844500  | -0.06673700 | 0.44051800  |
| C  | 2.69076100  | 1.82748000  | -0.43236400 |
| C  | 5.11316100  | 0.72177700  | 0.45277400  |
| C  | 3.85116500  | 2.60686600  | -0.41811000 |
| C  | 5.06532400  | 2.05860300  | 0.02550000  |
| H  | -1.88303700 | -1.90355400 | -0.19357100 |
| H  | -2.87651500 | -4.18309700 | -0.20413500 |
| H  | -1.41260800 | -6.18981200 | -0.01983200 |
| H  | 1.05281200  | -5.91266600 | 0.17526700  |
| H  | 2.05636300  | -3.63884700 | 0.17968100  |
| H  | 3.99209500  | -1.09816600 | 0.77302500  |
| H  | 6.04904100  | 0.29671800  | 0.79628700  |
| H  | 5.96327400  | 2.66478800  | 0.03770400  |
| H  | 3.81180100  | 3.63689300  | -0.75236200 |
| H  | 1.74779200  | 2.24026100  | -0.78141800 |
| Se | -2.83445900 | 1.93484800  | -0.12830600 |
| H  | -0.54494300 | 3.09111800  | 0.39901300  |

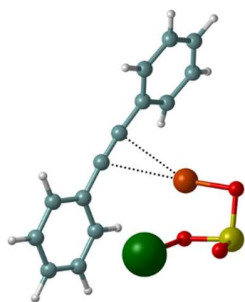

|    |             |             |             |
|----|-------------|-------------|-------------|
| O  | -3.16236500 | -1.01192600 | -0.25019300 |
| O  | -0.85656500 | -1.22284000 | 0.85264300  |
| O  | -1.21465200 | -2.68786900 | -1.37851200 |
| Cu | -2.05460600 | 0.40605100  | 0.57407700  |
| C  | -0.16077700 | 2.35687000  | -0.01863200 |
| C  | -1.03966000 | 2.09726000  | 1.09670400  |
| C  | -0.66548200 | 3.00588500  | -1.16012200 |
| C  | -2.89493800 | 3.10216000  | -0.18773000 |
| C  | -2.42281100 | 2.46057900  | 0.98738800  |
| C  | -2.02124600 | 3.38052900  | -1.24034600 |
| C  | 1.17764200  | 1.88374000  | 0.03253500  |
| C  | 2.29784200  | 1.37632700  | 0.08561600  |
| C  | 3.54710700  | 0.69792800  | 0.17550700  |
| C  | 4.61183900  | 0.98302300  | -0.71492300 |
| C  | 3.72714200  | -0.30939000 | 1.15990300  |
| C  | 5.81796200  | 0.28167400  | -0.61937200 |
| C  | 4.93761100  | -1.00477500 | 1.24482600  |
| C  | 5.98653800  | -0.71393200 | 0.35711200  |
| H  | -0.60713900 | 1.80494000  | 2.04768400  |
| H  | -3.06439500 | 2.40611100  | 1.86040200  |
| H  | -3.94031400 | 3.37619700  | -0.25787200 |
| H  | -2.38781500 | 3.87395500  | -2.13164000 |
| H  | 0.00318600  | 3.20676500  | -1.98959400 |
| H  | 4.48274000  | 1.75753500  | -1.46216200 |
| H  | 6.62784900  | 0.51252000  | -1.30143500 |
| H  | 6.92399000  | -1.25243700 | 0.42814200  |
| H  | 5.06505300  | -1.76744800 | 2.00374300  |
| H  | 2.91835100  | -0.52181800 | 1.85172100  |
| Se | -2.03901400 | -2.32692900 | 0.06218000  |
| K  | 0.91392600  | -1.27696700 | -1.09440300 |

**Product**

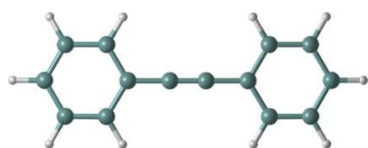

|   |            |             |             |
|---|------------|-------------|-------------|
| C | 0.61405600 | -0.00746100 | -0.00109700 |
|---|------------|-------------|-------------|

|   |             |             |             |
|---|-------------|-------------|-------------|
| C | -0.61405900 | -0.00707400 | -0.00090000 |
| C | -2.03844200 | -0.00382300 | -0.00042700 |
| C | -2.76393300 | -1.21981600 | 0.00105800  |
| C | -2.75600100 | 1.21688000  | -0.00130300 |
| C | -4.16216300 | -1.21065900 | 0.00164000  |
| C | -4.15422200 | 1.21703600  | -0.00076600 |
| C | -4.86379100 | 0.00550600  | 0.00072400  |
| H | -2.21985500 | -2.15734400 | 0.00180400  |
| H | -4.70557300 | -2.14869800 | 0.00282600  |
| H | -5.94770200 | 0.00908800  | 0.00115900  |
| H | -4.69133900 | 2.15870800  | -0.00148500 |
| H | -2.20562600 | 2.15071400  | -0.00244900 |
| C | 2.03840200  | -0.00385600 | -0.00073600 |
| C | 2.75597200  | 1.21690400  | 0.00078200  |
| C | 2.76397300  | -1.21972900 | -0.00158600 |
| C | 4.15417200  | 1.21703100  | 0.00167300  |
| H | 2.20566100  | 2.15079600  | 0.00136200  |
| C | 4.16221100  | -1.21062600 | -0.00070200 |
| H | 2.21993300  | -2.15729900 | -0.00289100 |
| C | 4.86383200  | 0.00550900  | 0.00100600  |
| H | 4.69125700  | 2.15873000  | 0.00296500  |
| H | 4.70545600  | -2.14875900 | -0.00130300 |
| H | 5.94773900  | 0.00914300  | 0.00181700  |

**TS1**

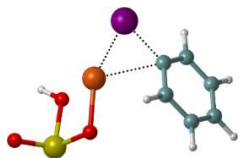

|    |             |             |             |
|----|-------------|-------------|-------------|
| O  | -2.04313900 | -0.45361100 | 1.43591500  |
| O  | -3.99438900 | -0.81465600 | -0.61985500 |
| O  | -1.67317200 | 0.72773300  | -0.75153700 |
| Cu | -0.40207500 | -0.52067900 | 0.22714900  |
| C  | 1.96223800  | 0.63004600  | -0.07680700 |
| C  | 1.39694700  | 1.36870800  | -1.12962700 |
| C  | 2.58151500  | 1.24878100  | 1.02039300  |
| C  | 2.06233800  | 3.40884700  | 0.02240900  |
| C  | 1.44758900  | 2.76858100  | -1.06340200 |
| C  | 2.62637000  | 2.65094900  | 1.05881600  |
| I  | 1.90881000  | -1.51660300 | -0.16879400 |
| H  | 0.90178100  | 0.87954600  | -1.95909400 |
| H  | 0.99071800  | 3.34603000  | -1.85708900 |
| H  | 2.09509000  | 4.49069000  | 0.06464800  |
| H  | 3.09999700  | 3.14145600  | 1.90077800  |
| H  | 3.01114300  | 0.66387700  | 1.82422300  |
| Se | -3.17360500 | 0.46915900  | 0.02577700  |
| H  | -2.47929500 | -1.12456100 | 2.00199200  |

**TS2**

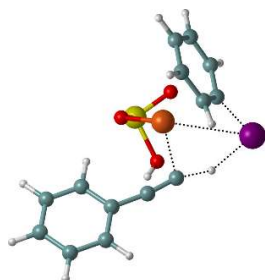

|    |             |             |             |
|----|-------------|-------------|-------------|
| O  | -0.85769500 | 1.75715200  | 0.40151200  |
| O  | -0.37495300 | 1.25472600  | -2.20308800 |
| O  | 1.56266200  | 2.39815200  | -0.72010000 |
| Cu | 0.03206800  | 0.05695500  | 0.72476100  |
| C  | 2.12183300  | -0.59392600 | 0.81278100  |
| C  | 2.78810300  | 0.61653900  | 1.11346600  |
| C  | 1.32819600  | -1.26307000 | 1.79670100  |
| C  | 1.82429700  | 0.56371200  | 3.35263200  |
| C  | 2.64258500  | 1.17755400  | 2.38955400  |
| C  | 1.16191900  | -0.63723800 | 3.05996100  |
| C  | -0.83009900 | -1.48565100 | -0.51420900 |
| C  | -2.06263700 | -1.38126800 | -0.38542000 |
| C  | -3.44070000 | -1.09661400 | -0.13828600 |
| C  | -4.43658500 | -2.08355500 | -0.31580700 |
| C  | -3.80945900 | 0.20298100  | 0.29068500  |
| C  | -5.77869000 | -1.77529800 | -0.07040600 |
| C  | -5.15471400 | 0.49460200  | 0.53773000  |
| C  | -6.14174400 | -0.48850300 | 0.35791300  |
| H  | 3.36195200  | 1.12607400  | 0.35437200  |
| H  | 3.14321500  | 2.11089200  | 2.61066700  |
| H  | 1.69968000  | 1.01911200  | 4.32675100  |
| H  | 0.54567600  | -1.12363700 | 3.80588700  |
| H  | 0.94232900  | -2.26013800 | 1.62141300  |
| H  | -4.14988300 | -3.07552800 | -0.64536900 |
| H  | -6.53893100 | -2.53462900 | -0.21124000 |
| H  | -7.18251900 | -0.25446100 | 0.54993800  |
| H  | -5.43341700 | 1.48825800  | 0.86883900  |
| H  | -3.03368100 | 0.95335100  | 0.42753400  |
| Se | -0.07546600 | 2.58655000  | -0.91786300 |
| H  | 0.46728300  | -1.76001000 | -1.02207300 |
| I  | 2.54796300  | -1.56144000 | -1.02080000 |
| H  | -1.14183200 | 0.69081400  | -1.94543900 |



**TS3**

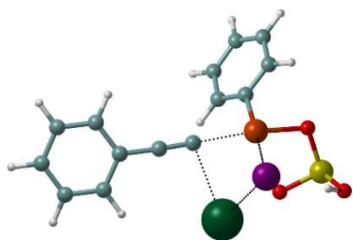

|    |             |             |             |
|----|-------------|-------------|-------------|
| O  | -1.73405400 | -0.35080900 | 1.79187900  |
| O  | -3.87309800 | -1.51950400 | 0.44095200  |
| O  | -2.66425700 | 0.83037100  | -0.35401900 |
| Cu | -0.76276800 | 0.60530000  | -0.39551700 |
| C  | -0.50444700 | 2.54973600  | -0.30193500 |
| C  | 0.42355200  | 3.14936100  | 0.54470900  |
| C  | -1.33868500 | 3.24860100  | -1.17180400 |
| C  | -0.28709400 | 5.29843600  | -0.37172400 |
| C  | 0.51981600  | 4.55600400  | 0.50203600  |
| C  | -1.20809700 | 4.65162700  | -1.20703000 |
| C  | 1.51470000  | 0.23419100  | -0.15507600 |
| C  | 2.73927300  | 0.05572500  | -0.03055700 |
| C  | 4.15702200  | -0.11132400 | 0.07388300  |
| C  | 4.72626200  | -1.03167800 | 0.98570700  |
| C  | 5.02542000  | 0.64883400  | -0.74608300 |
| C  | 6.11366000  | -1.18736200 | 1.07661300  |
| C  | 6.41185600  | 0.48788200  | -0.65269700 |
| C  | 6.96359700  | -0.42778100 | 0.25779100  |
| H  | 1.07327700  | 2.56766000  | 1.18492300  |
| H  | 1.24144300  | 5.05138600  | 1.14276700  |
| H  | -0.19967700 | 6.37853500  | -0.39984700 |
| H  | -1.84582400 | 5.22173800  | -1.87354100 |
| H  | -2.08743800 | 2.74786100  | -1.77364300 |
| H  | 4.07255100  | -1.62735800 | 1.61811000  |
| H  | 6.53137300  | -1.89934800 | 1.77948400  |
| H  | 8.03842800  | -0.54905800 | 0.32653700  |
| H  | 7.06277400  | 1.07558300  | -1.28994100 |
| H  | 4.59733500  | 1.35283300  | -1.44944400 |
| Se | -3.23006900 | 0.03227200  | 1.09814800  |
| I  | -0.88557900 | -2.43281900 | -1.26337000 |
| H  | -3.21842700 | -1.97624700 | -0.16205900 |
| K  | 0.43382800  | -1.70890000 | 1.79656600  |

**TS4**

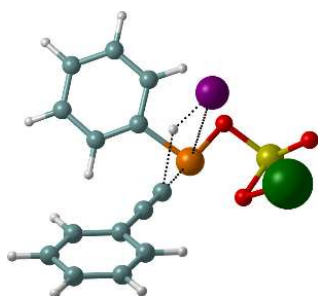

|    |             |             |             |
|----|-------------|-------------|-------------|
| O  | 0.87634200  | 1.99746500  | -0.83853700 |
| O  | 0.89555900  | 0.86607000  | 1.44461100  |
| O  | -0.61190000 | 3.10483100  | 1.26411000  |
| Cu | 0.10390700  | 0.16589300  | -0.43057100 |
| C  | -2.04775900 | -0.01633000 | -0.79886300 |
| C  | -2.49693100 | 1.24028300  | -0.32613400 |
| C  | -1.42216600 | -0.13472800 | -2.08212700 |
| C  | -1.67739400 | 2.27341400  | -2.37442500 |
| C  | -2.27410300 | 2.37972700  | -1.10577000 |
| C  | -1.25750600 | 1.03099900  | -2.85982700 |
| C  | 0.41175500  | -1.89898900 | -0.07831900 |
| C  | 1.64976000  | -1.82608400 | -0.22364800 |
| C  | 3.05429700  | -1.59948900 | -0.35687600 |
| C  | 3.97450500  | -2.66230600 | -0.20272500 |
| C  | 3.52839600  | -0.29614900 | -0.64509100 |
| C  | 5.34658300  | -2.42587800 | -0.33392500 |
| C  | 4.90337100  | -0.07554500 | -0.77576600 |
| C  | 5.81451500  | -1.13308500 | -0.62080400 |
| H  | -2.95379400 | 1.34034500  | 0.65019600  |
| H  | -2.52142900 | 3.34572800  | -0.68936900 |
| H  | -1.51046900 | 3.16428800  | -2.96552400 |
| H  | -0.77441600 | 0.95040100  | -3.82563900 |
| H  | -1.17295700 | -1.10893800 | -2.48715000 |
| H  | 3.60565500  | -3.65923700 | 0.01303200  |
| H  | 6.04869900  | -3.24347800 | -0.21561400 |
| H  | 6.87880900  | -0.95278800 | -0.72303700 |
| H  | 5.26235400  | 0.92304200  | -0.99563200 |
| H  | 2.81307500  | 0.51846100  | -0.75563000 |
| Se | 0.92580500  | 2.53958000  | 0.84541600  |
| H  | -0.93526900 | -2.33870400 | 0.01429100  |
| I  | -2.95012500 | -1.78508600 | 0.06451300  |
| K  | -0.37885700 | -0.65095600 | 2.84461200  |

**TS5**

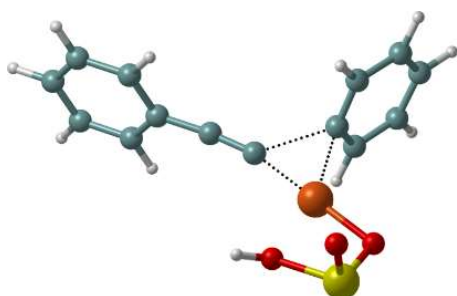

|    |             |             |             |
|----|-------------|-------------|-------------|
| O  | 3.05937200  | 0.00710800  | -0.34404400 |
| O  | 1.60235000  | -1.97777700 | -0.49887300 |
| O  | 3.67007600  | -2.03018200 | 1.45690800  |
| Cu | 1.10490600  | 0.03923100  | -0.23523700 |
| C  | -0.12951300 | 2.10586300  | 0.01303200  |
| C  | 0.00105600  | 2.61921100  | 1.29840300  |
| C  | -0.17602600 | 2.84588800  | -1.16312100 |
| C  | 0.12326200  | 4.81641100  | 0.24412900  |
| C  | 0.14083800  | 4.01660300  | 1.39793600  |
| C  | -0.03423600 | 4.24015000  | -1.02632100 |
| C  | -0.98793300 | 0.07369600  | -0.11930300 |
| C  | -2.19459000 | -0.24041500 | -0.05508100 |
| C  | -3.51569000 | -0.76035200 | 0.00001000  |
| C  | -4.07938300 | -1.16235900 | 1.23770800  |
| C  | -4.29295900 | -0.88584600 | -1.17961600 |
| C  | -5.37816400 | -1.67417300 | 1.28906800  |
| C  | -5.59141900 | -1.39779600 | -1.11784700 |
| C  | -6.13860700 | -1.79502600 | 0.11373400  |
| H  | 0.00458500  | 1.98395700  | 2.17286500  |
| H  | 0.26269000  | 4.46726300  | 2.37564500  |
| H  | 0.22866200  | 5.89057200  | 0.33562700  |
| H  | -0.04905000 | 4.86279500  | -1.91292900 |
| H  | -0.30839600 | 2.37974800  | -2.12937400 |
| H  | -3.48598600 | -1.06984300 | 2.13977100  |
| H  | -5.79847300 | -1.98117800 | 2.23960200  |
| H  | -7.14535100 | -2.19406100 | 0.15705000  |
| H  | -6.17720000 | -1.48984800 | -2.02499600 |
| H  | -3.86377400 | -0.58077000 | -2.12677800 |
| Se | 3.52860400  | -1.63049000 | -0.14129000 |
| H  | 1.18328500  | -2.77400300 | -0.10906600 |

**TS6**

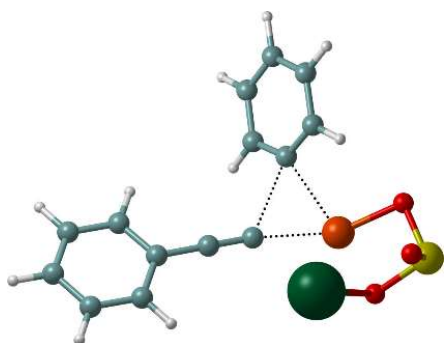

|    |             |             |             |
|----|-------------|-------------|-------------|
| O  | 3.00292000  | 0.69591800  | -0.13961400 |
| O  | 2.21383400  | -1.51261200 | -1.10180400 |
| O  | 3.06408600  | -1.58348600 | 1.44679900  |
| Cu | 1.27881600  | 0.23730900  | -0.95276600 |
| C  | -0.09499600 | 2.11470500  | -0.12275200 |
| C  | 0.59538700  | 2.44660700  | 1.03599900  |
| C  | -0.96632900 | 2.93748500  | -0.82335300 |
| C  | -0.43380700 | 4.65257800  | 0.83097700  |
| C  | 0.41876800  | 3.76516000  | 1.50566200  |
| C  | -1.11779300 | 4.24872000  | -0.32696300 |
| C  | -1.02662600 | -0.08212900 | -0.56225600 |
| C  | -2.21041700 | -0.41598800 | -0.34655800 |
| C  | -3.58193500 | -0.77780400 | -0.16360500 |
| C  | -4.58888700 | 0.21683400  | -0.22533000 |
| C  | -3.97120500 | -2.11685100 | 0.07935700  |
| C  | -5.93387000 | -0.12172700 | -0.04634400 |
| C  | -5.31815200 | -2.44919000 | 0.25720000  |
| C  | -6.30607200 | -1.45372300 | 0.19633200  |
| H  | 1.29214200  | 1.76653700  | 1.51306700  |
| H  | 0.96383900  | 4.08632000  | 2.38609700  |
| H  | -0.56593200 | 5.65990300  | 1.20807300  |
| H  | -1.77442900 | 4.93805500  | -0.84644400 |
| H  | -1.49802200 | 2.59821300  | -1.70205300 |
| H  | -4.29920800 | 1.24523100  | -0.41063300 |
| H  | -6.69227100 | 0.65125400  | -0.09696300 |
| H  | -7.34964200 | -1.71237000 | 0.33302900  |
| H  | -5.59892700 | -3.48054800 | 0.43873700  |
| H  | -3.21140800 | -2.89226700 | 0.11206200  |
| Se | 3.57566300  | -0.98665300 | -0.05111800 |
| K  | 0.58129100  | -2.35698400 | 0.89789500  |

# **10: Proton(400 MHz) and Carbon NMR(100 MHz)**

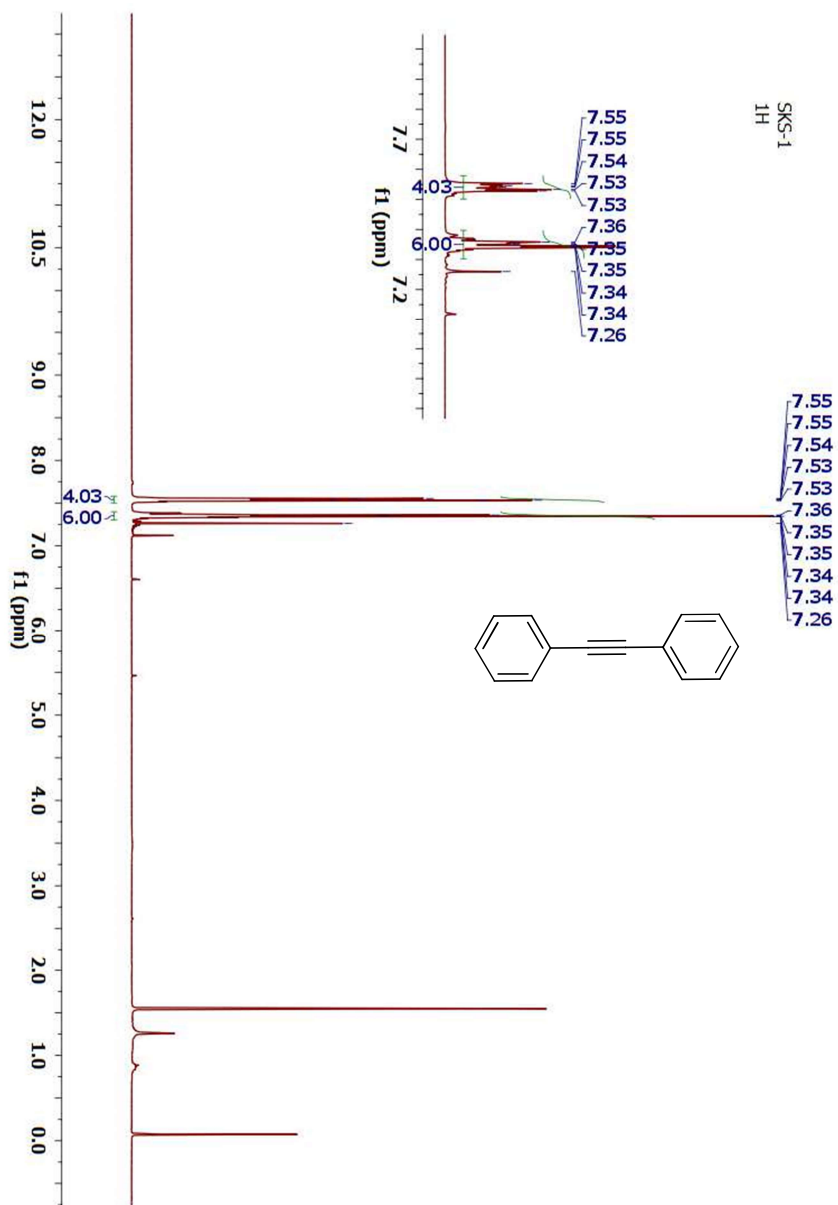

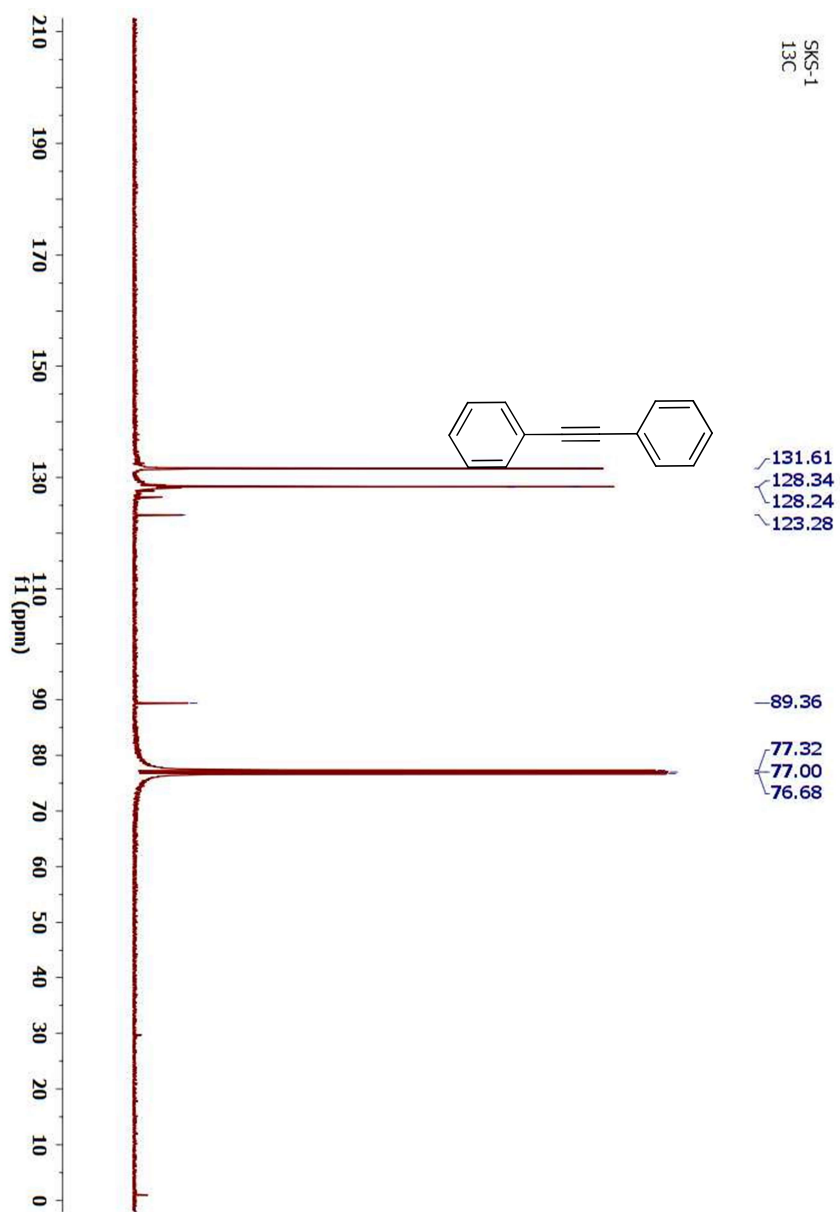

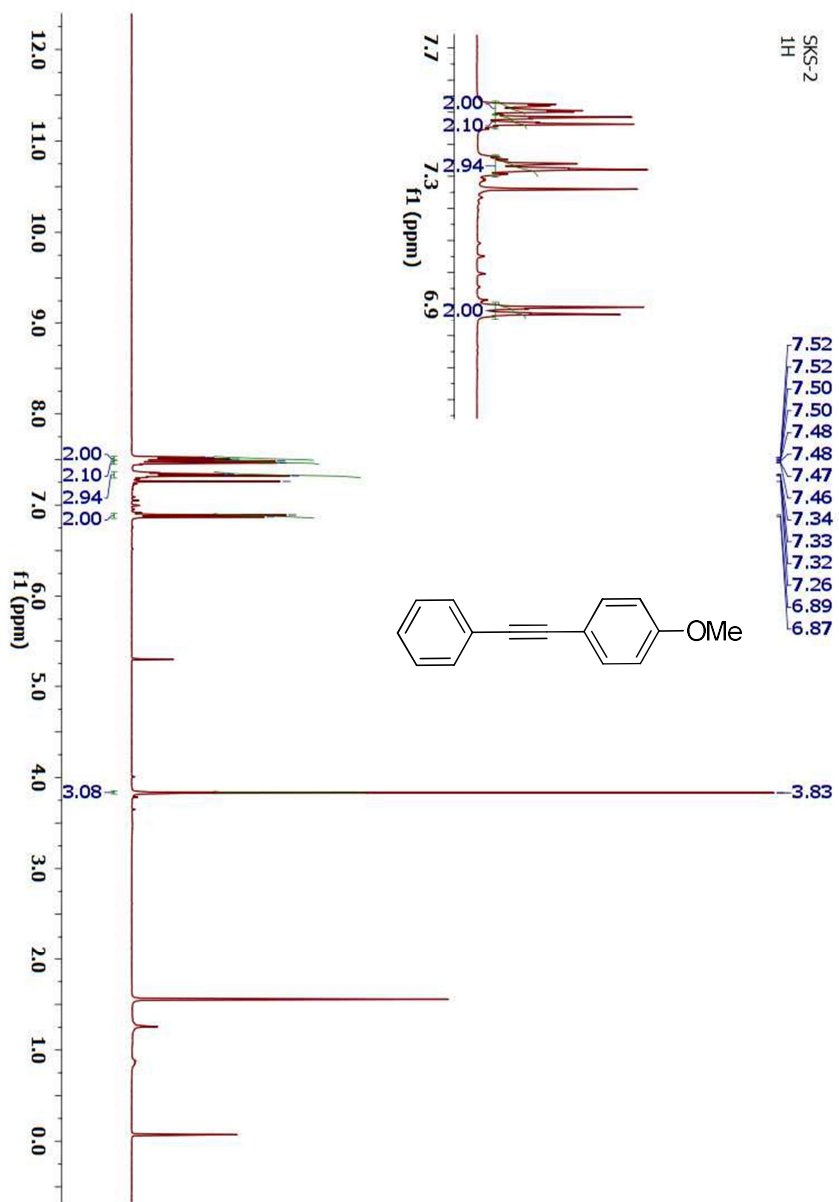



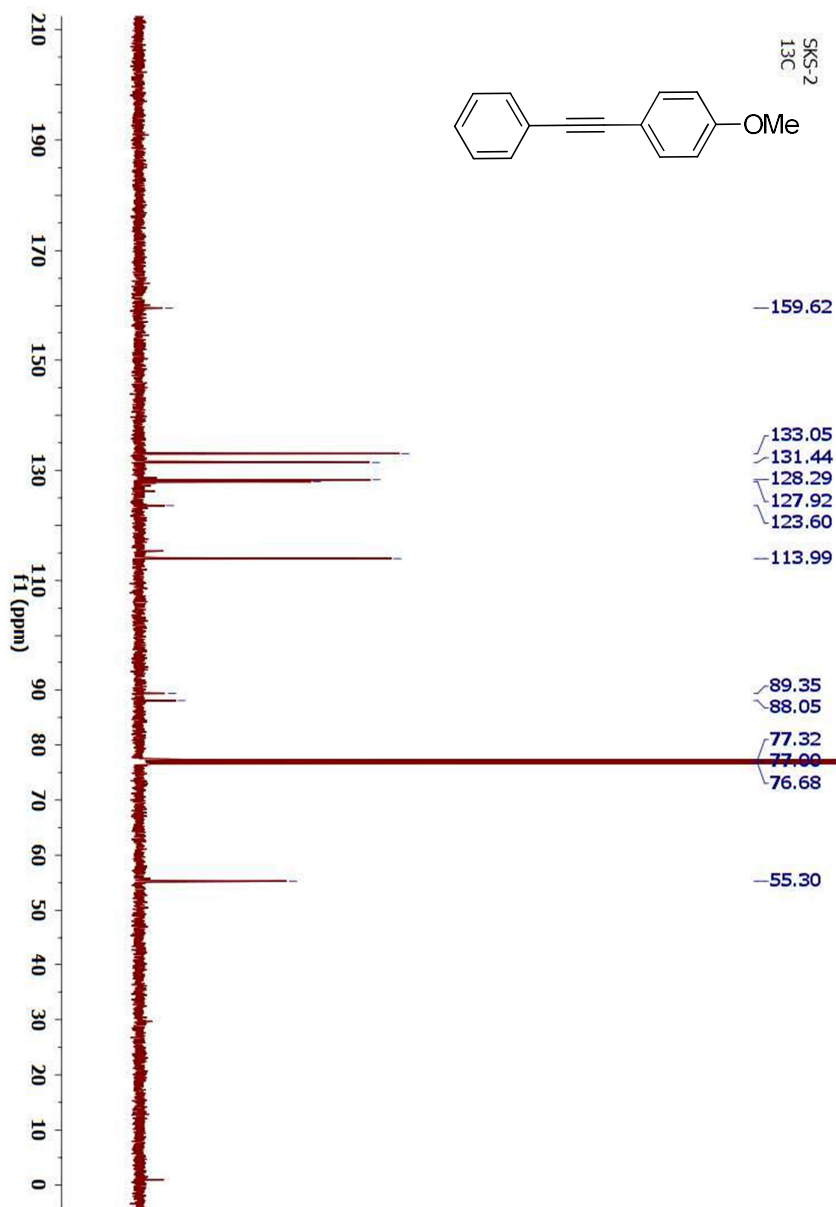

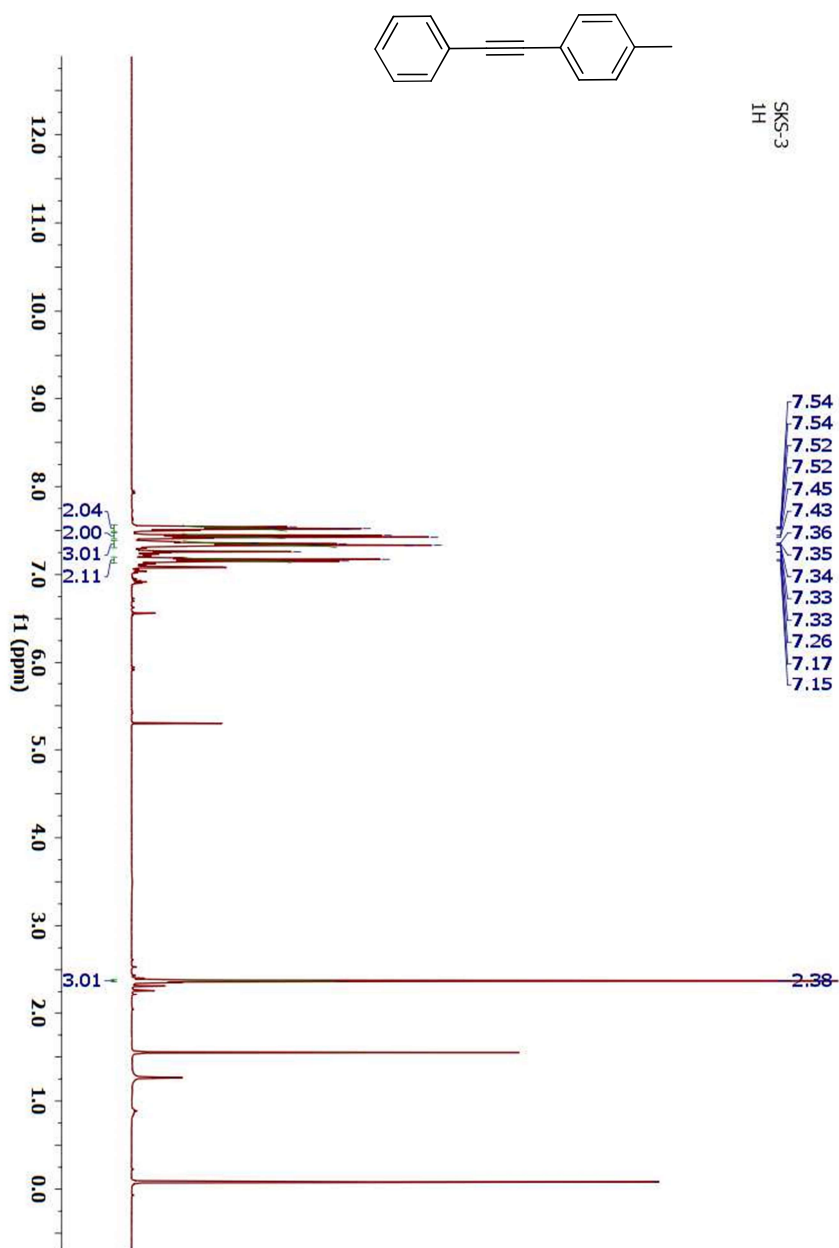

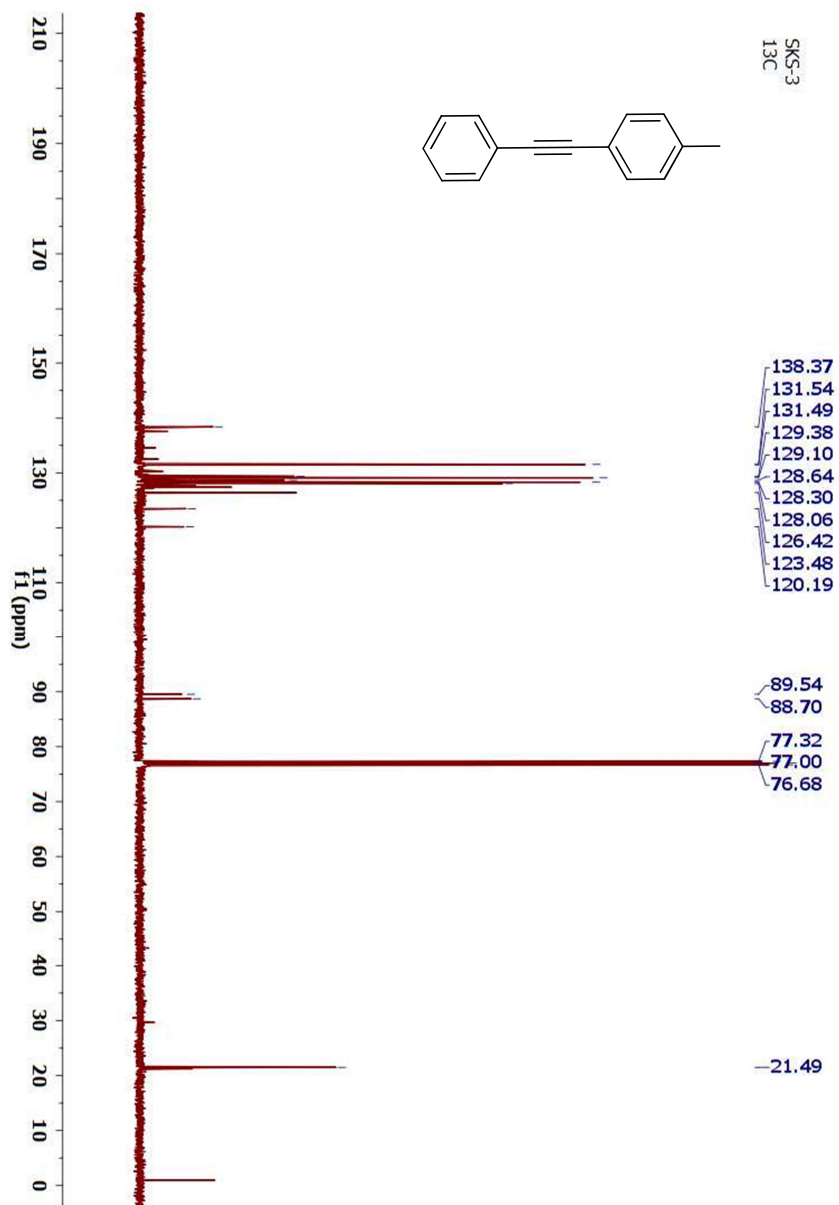

SKS-4  
1H

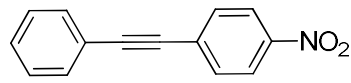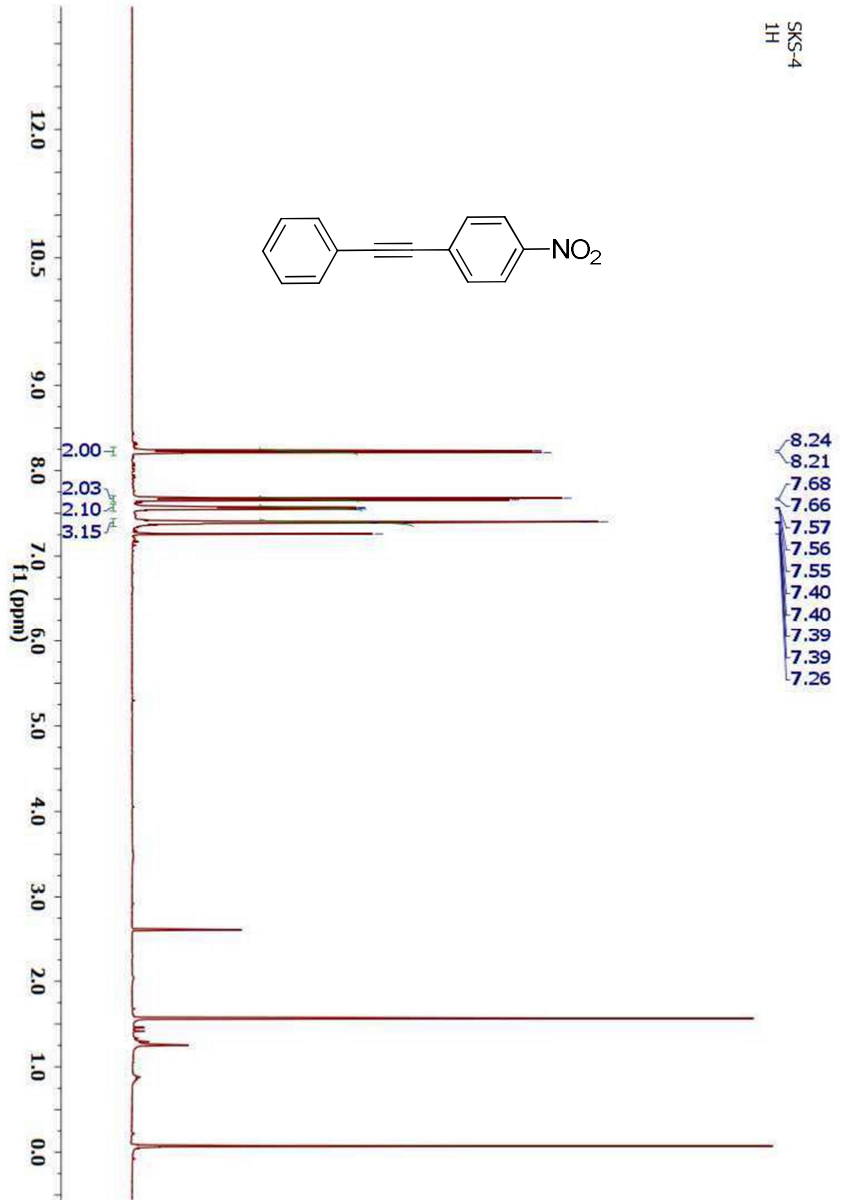

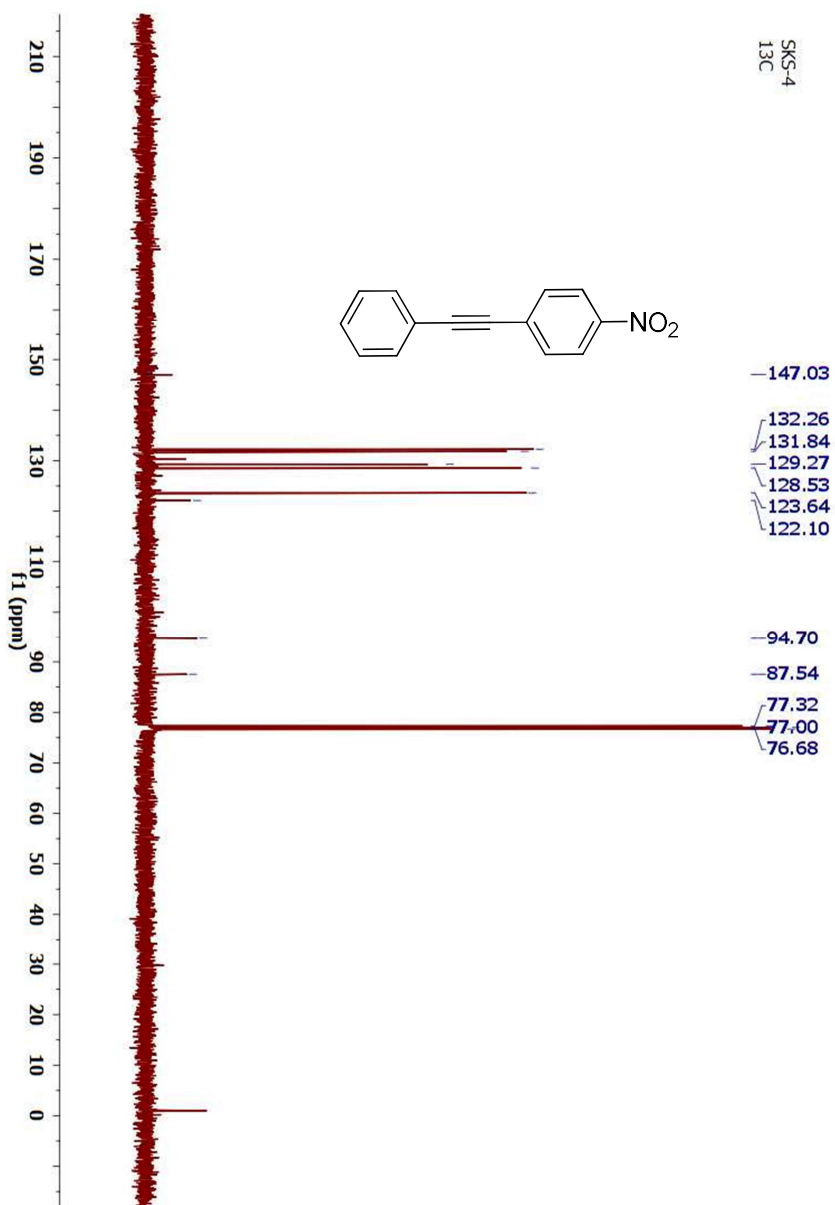

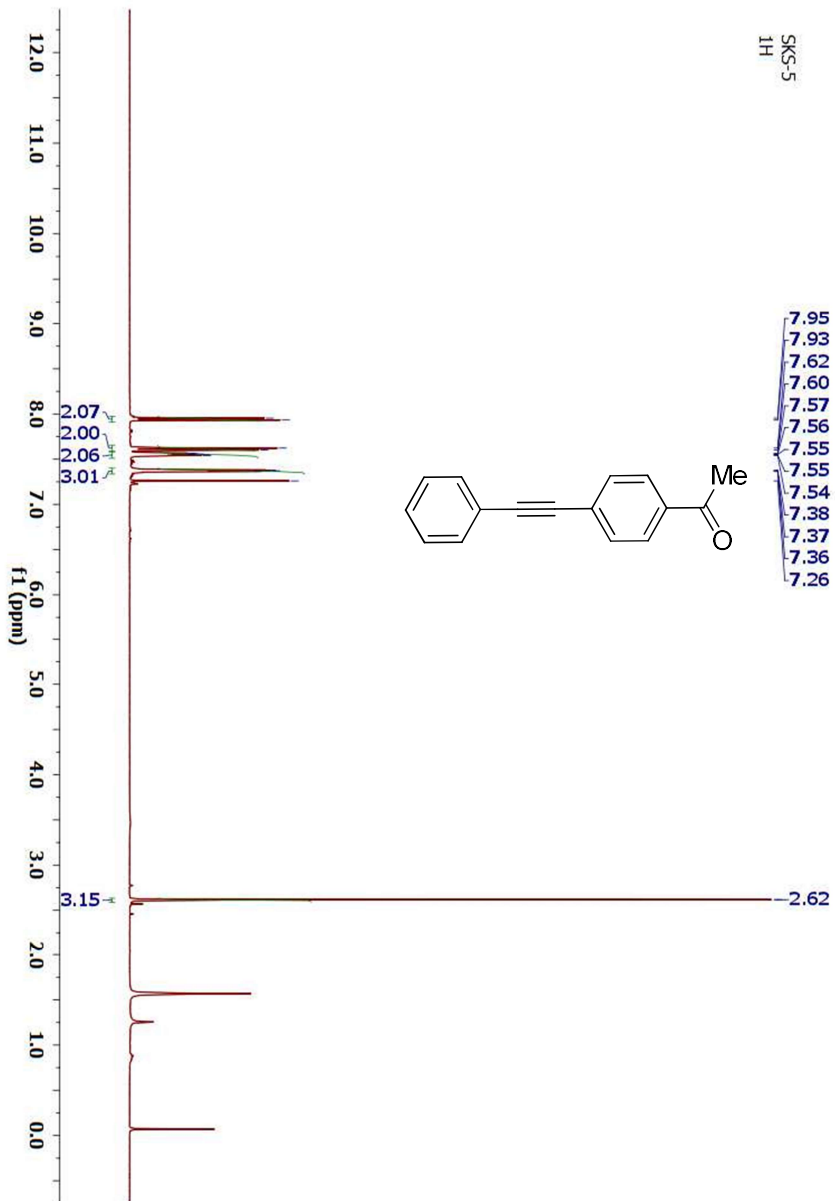

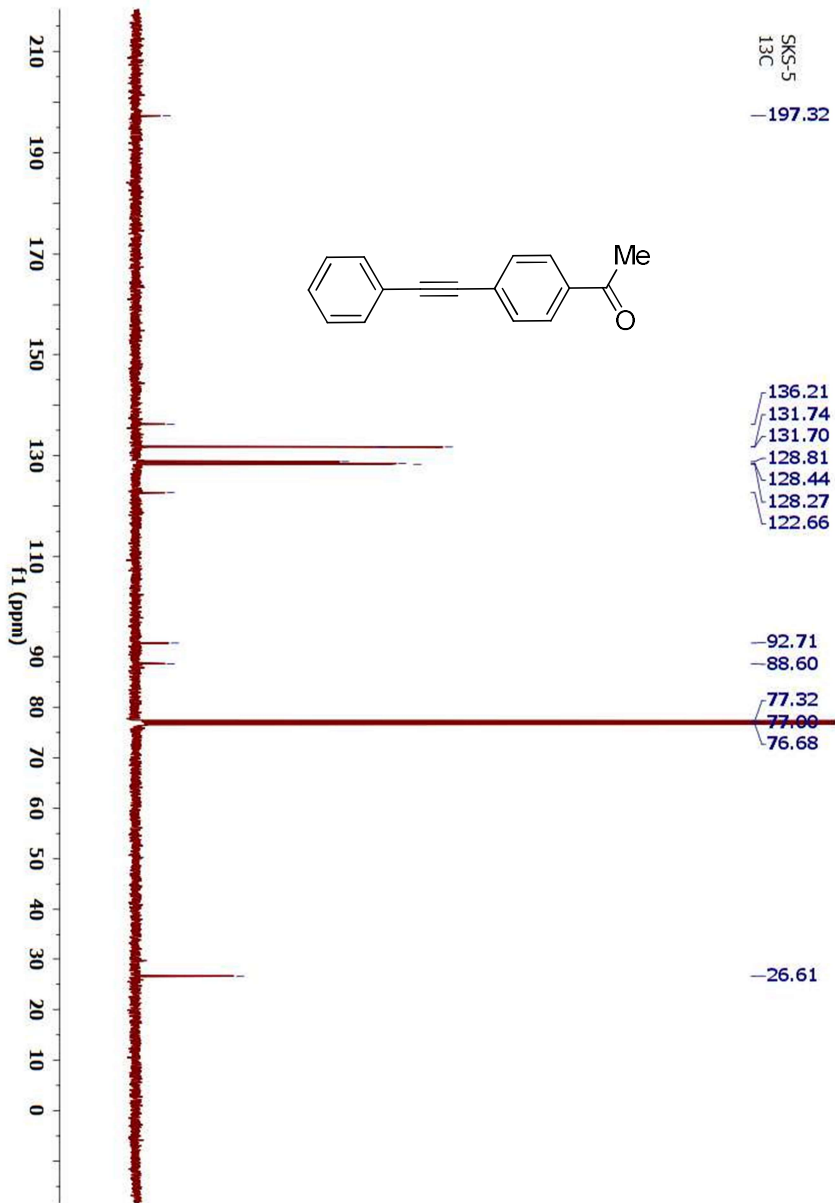

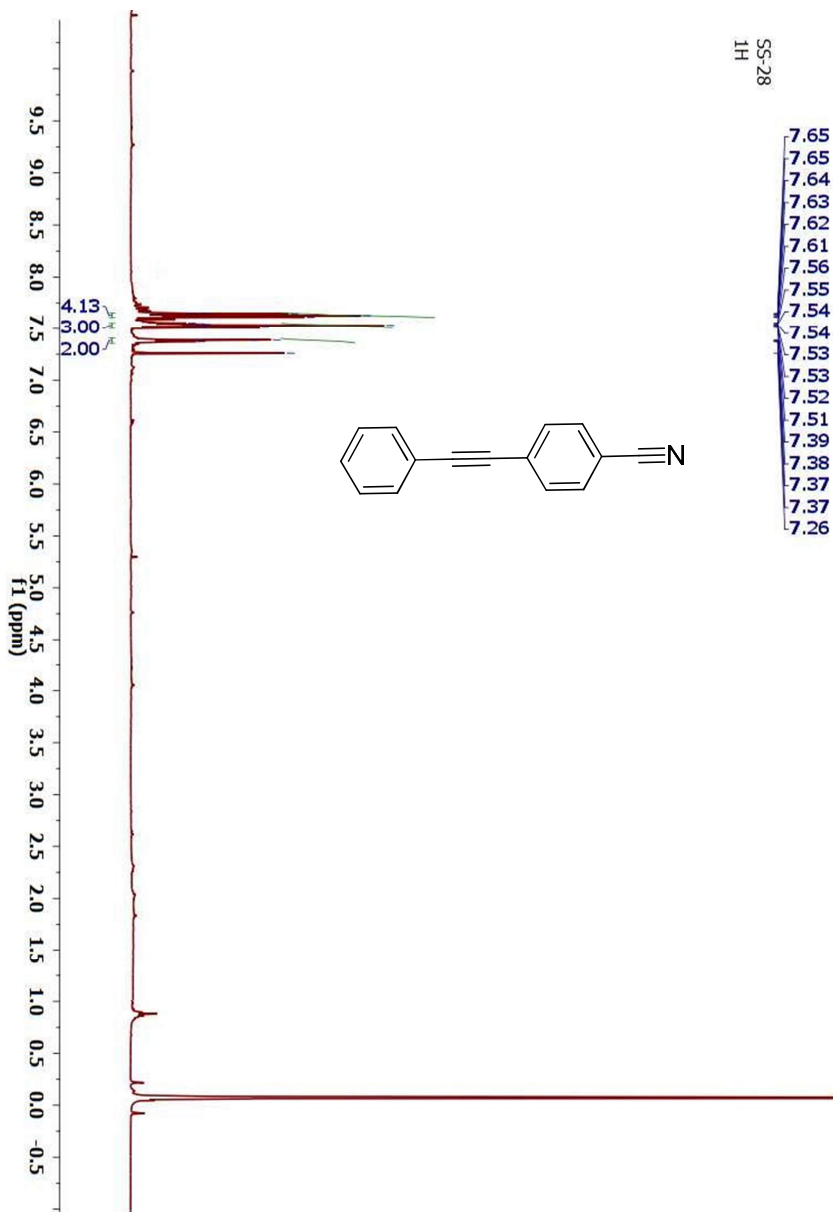



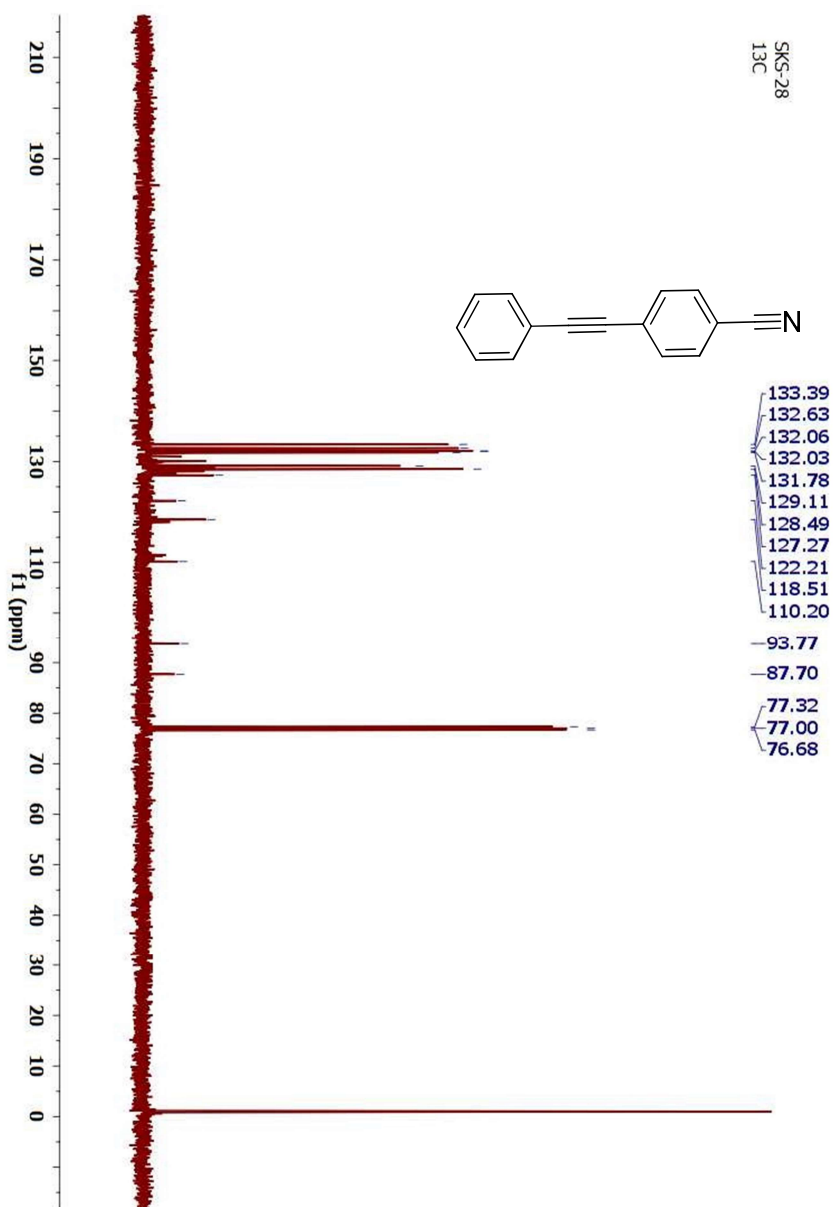

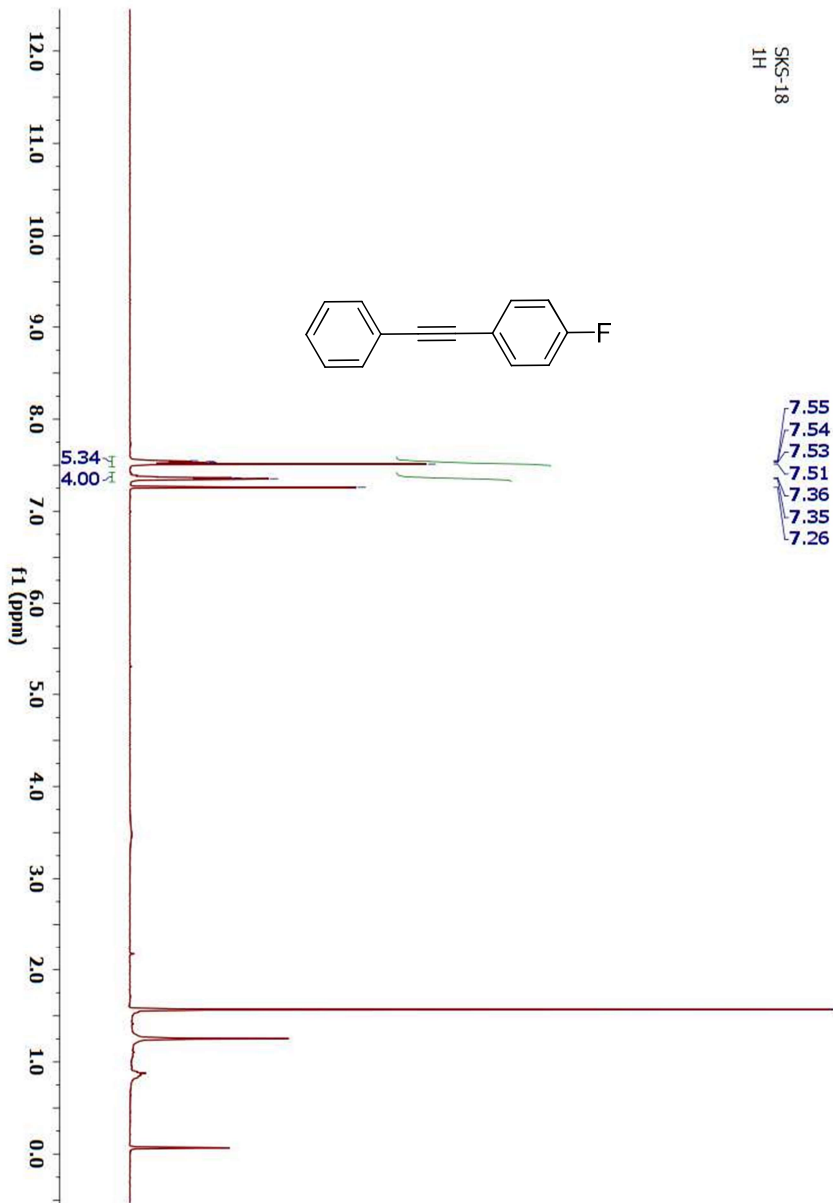

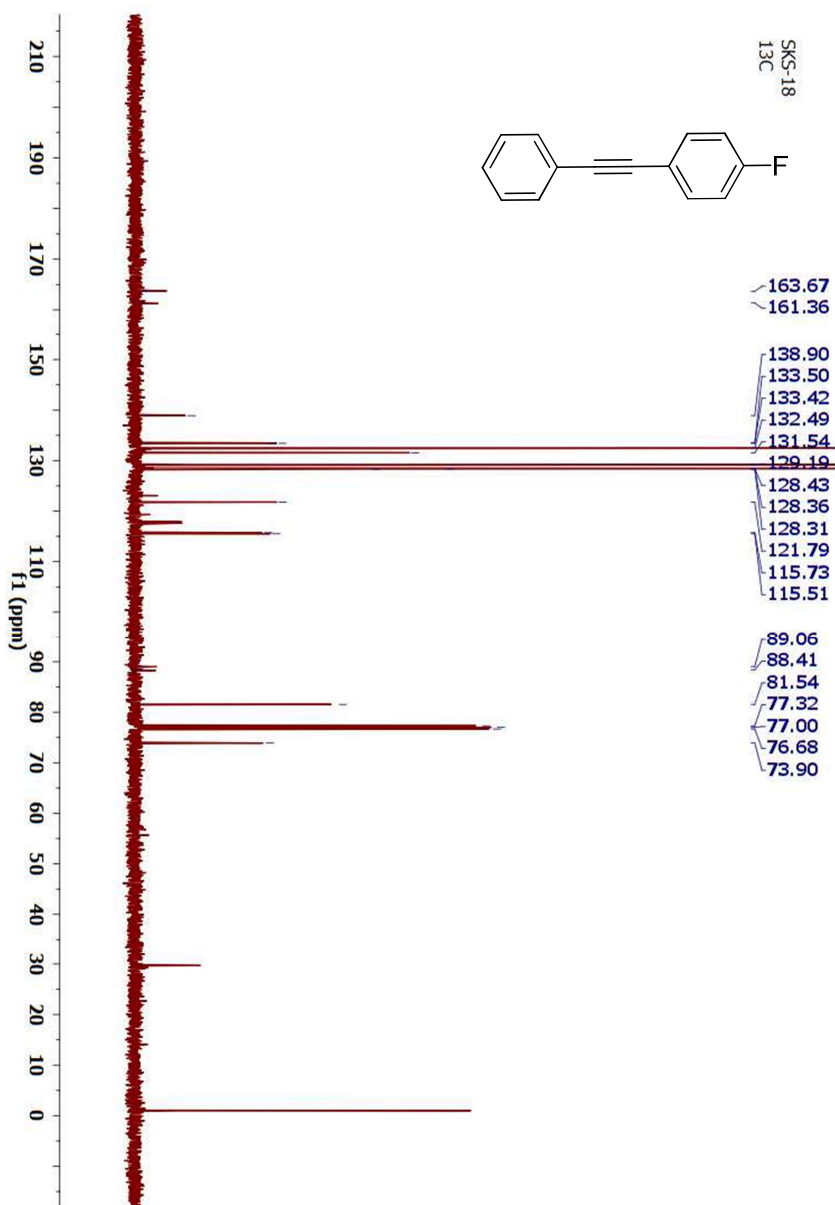

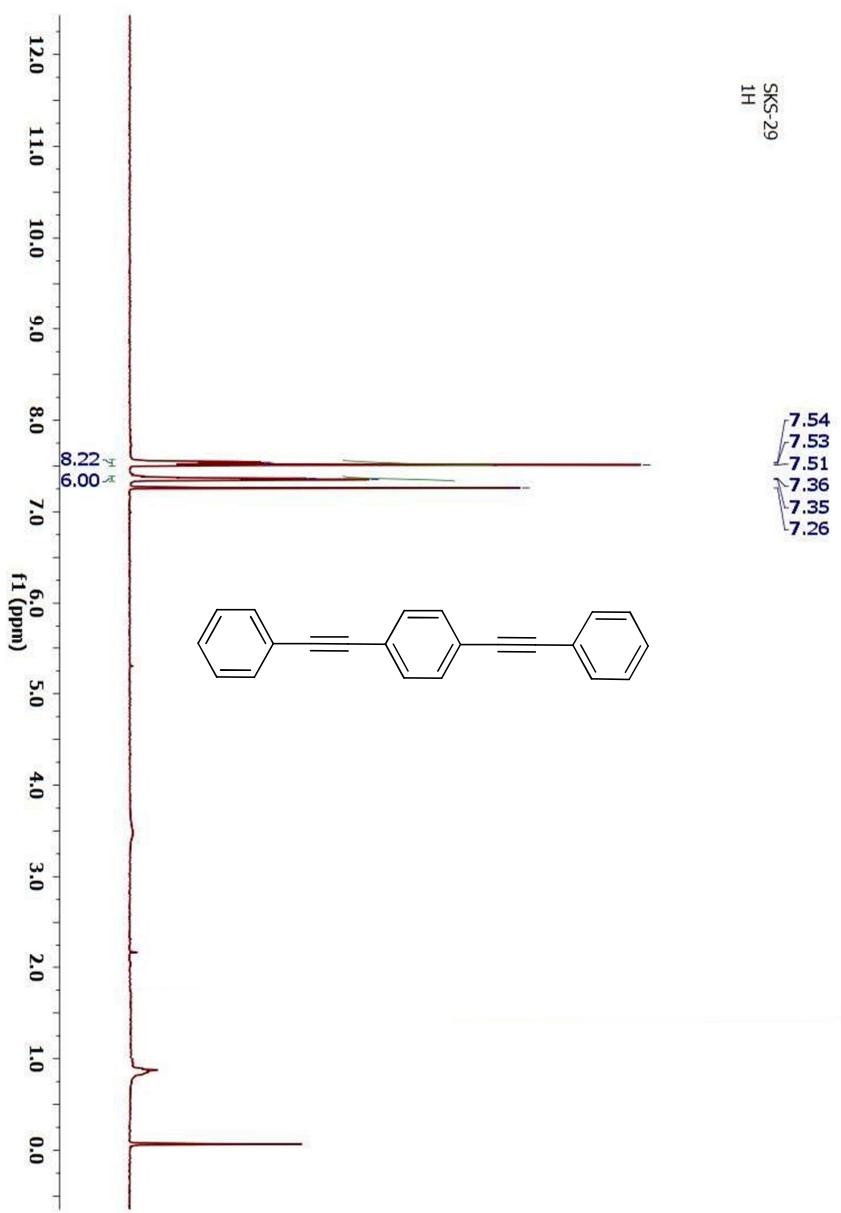

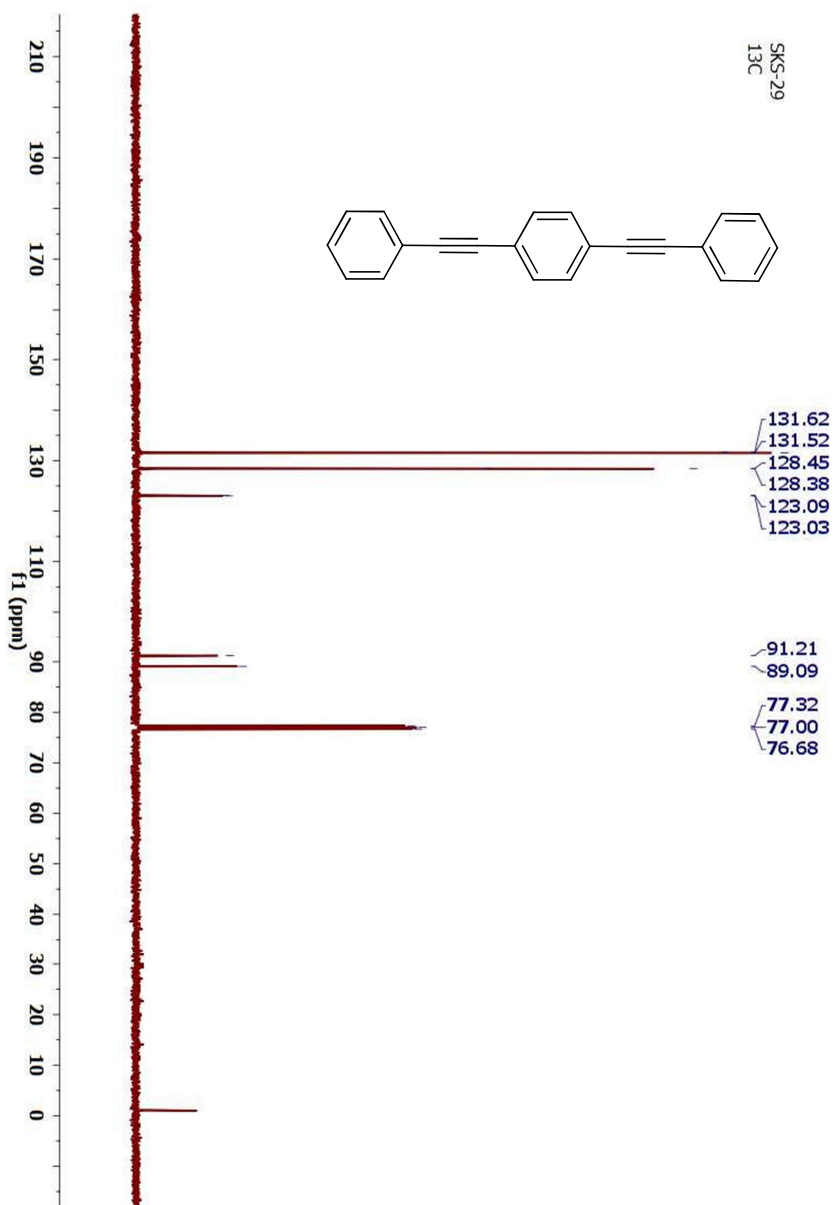

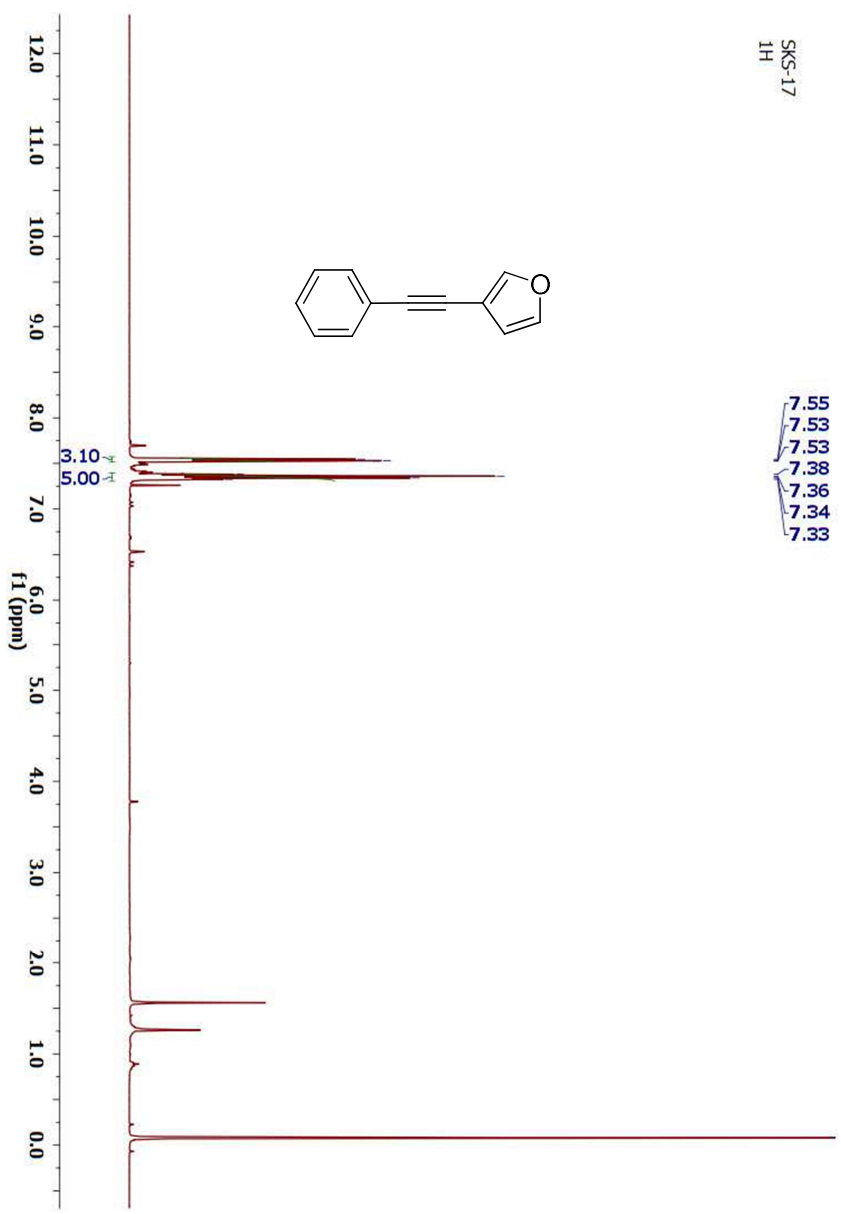

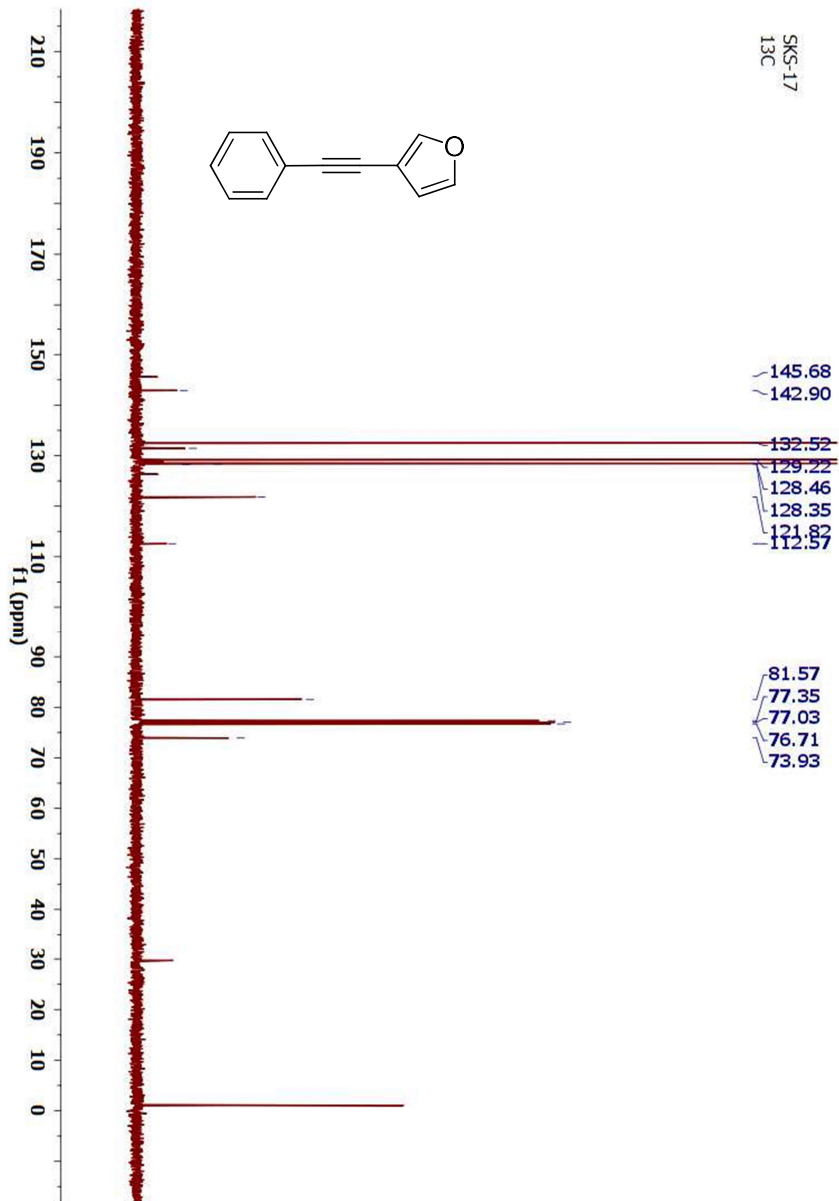

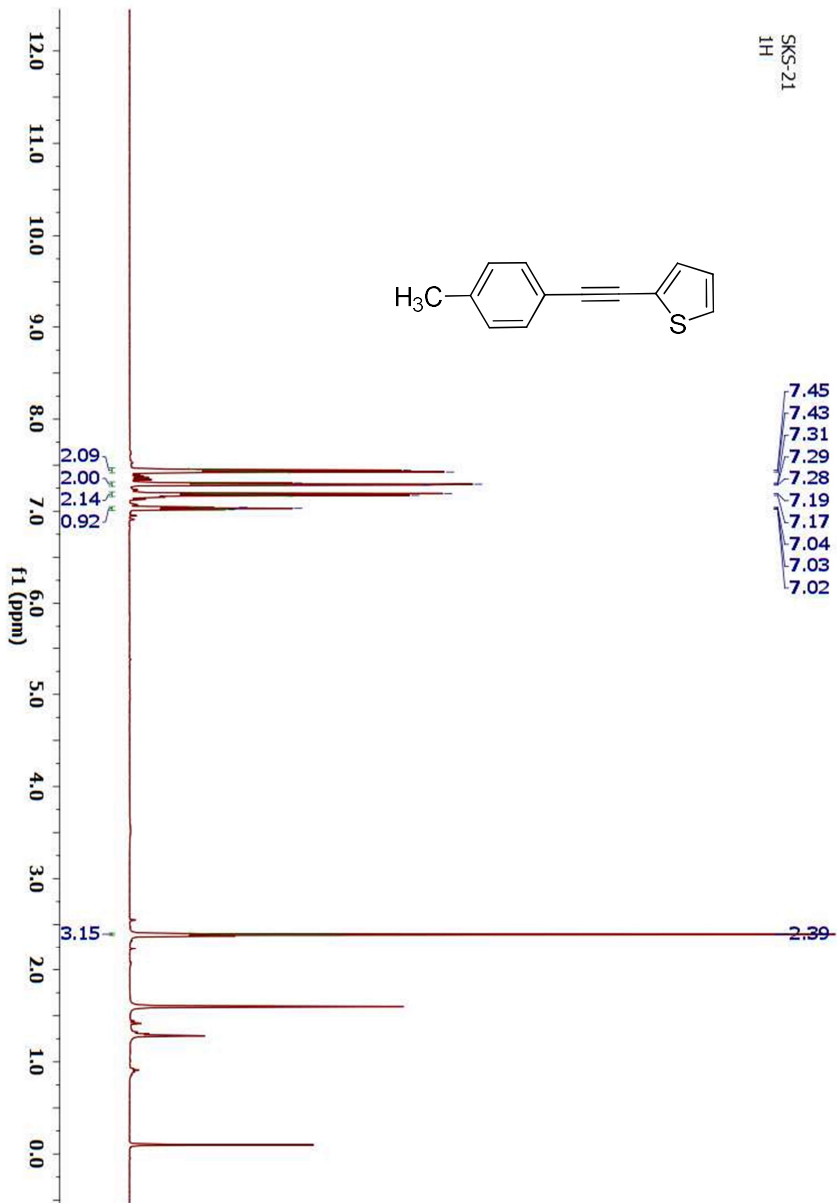



SKS-21  
13C

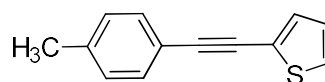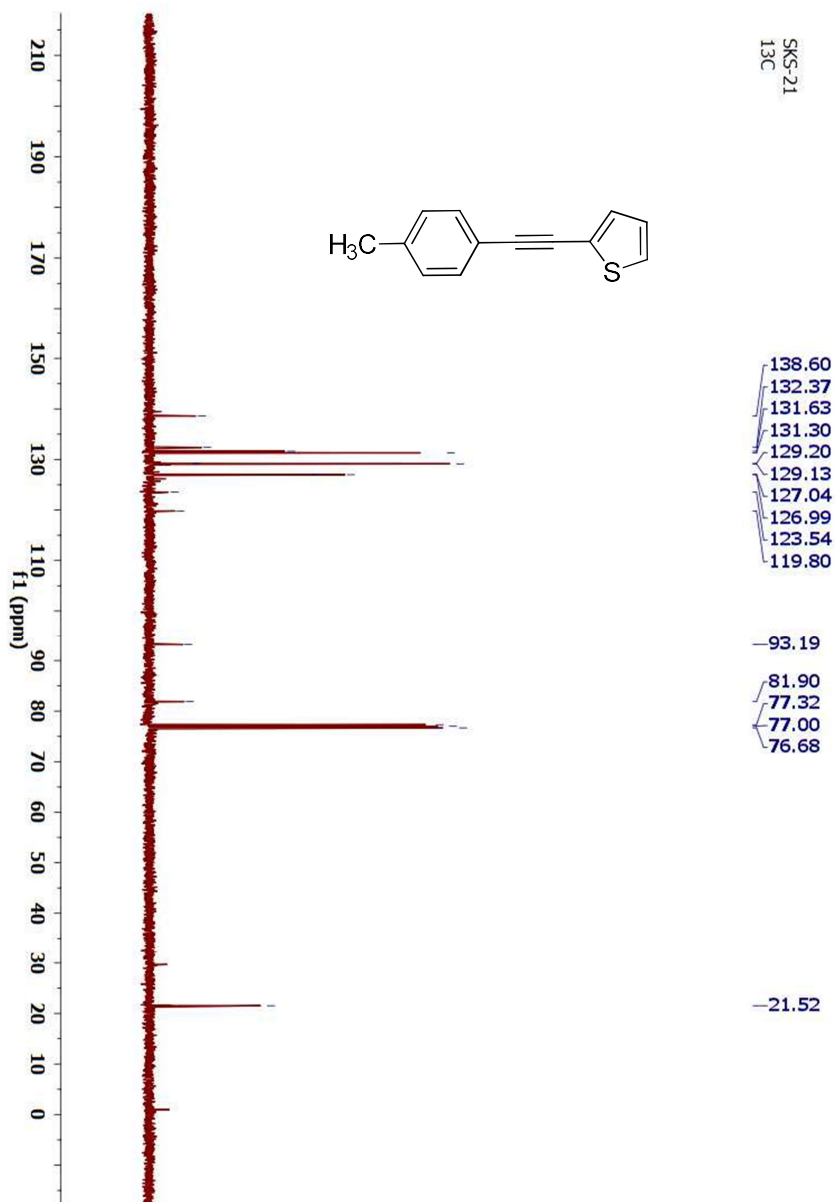

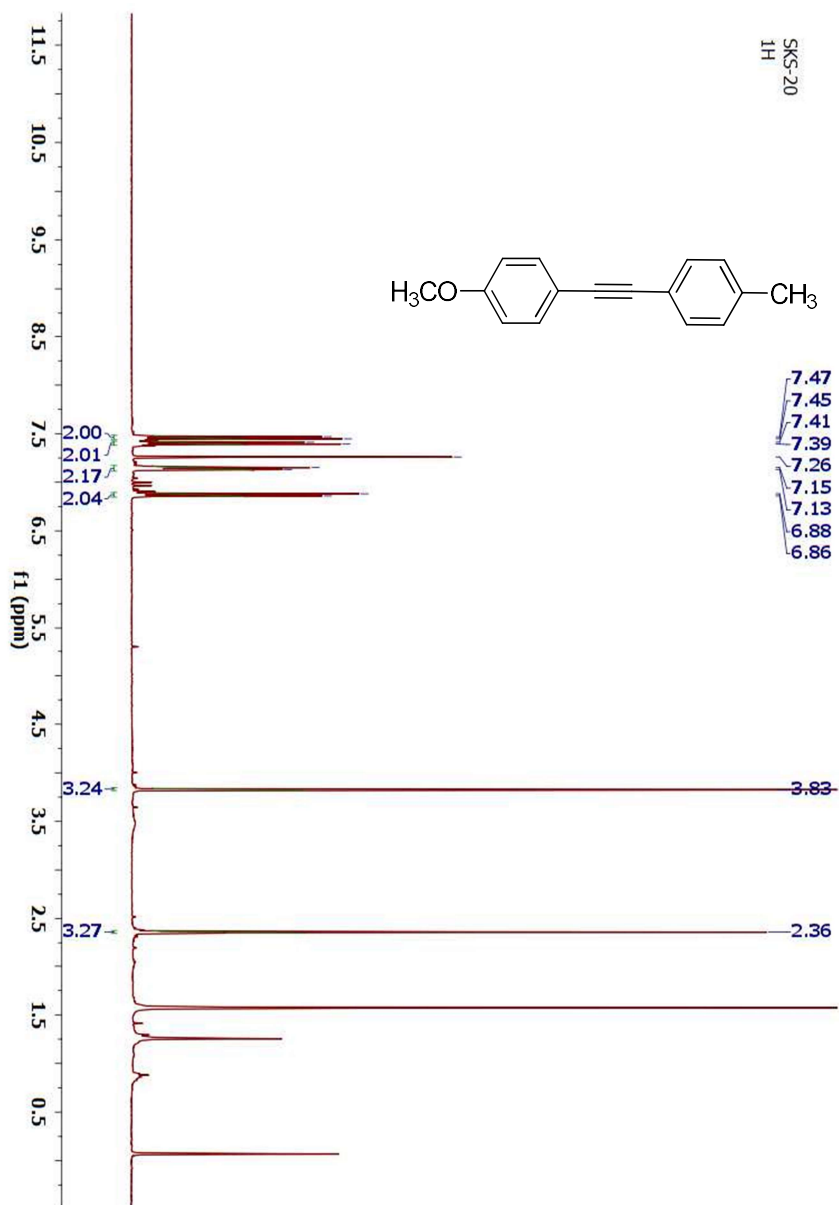

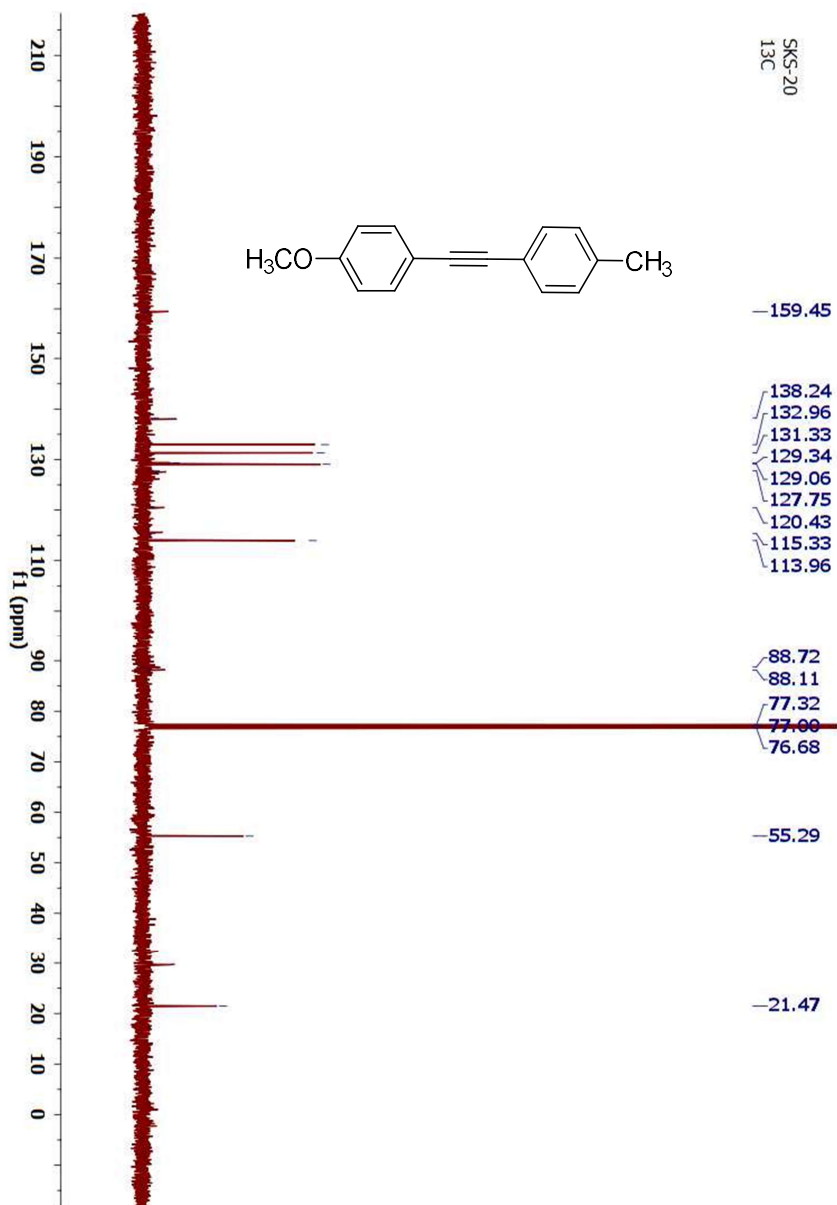

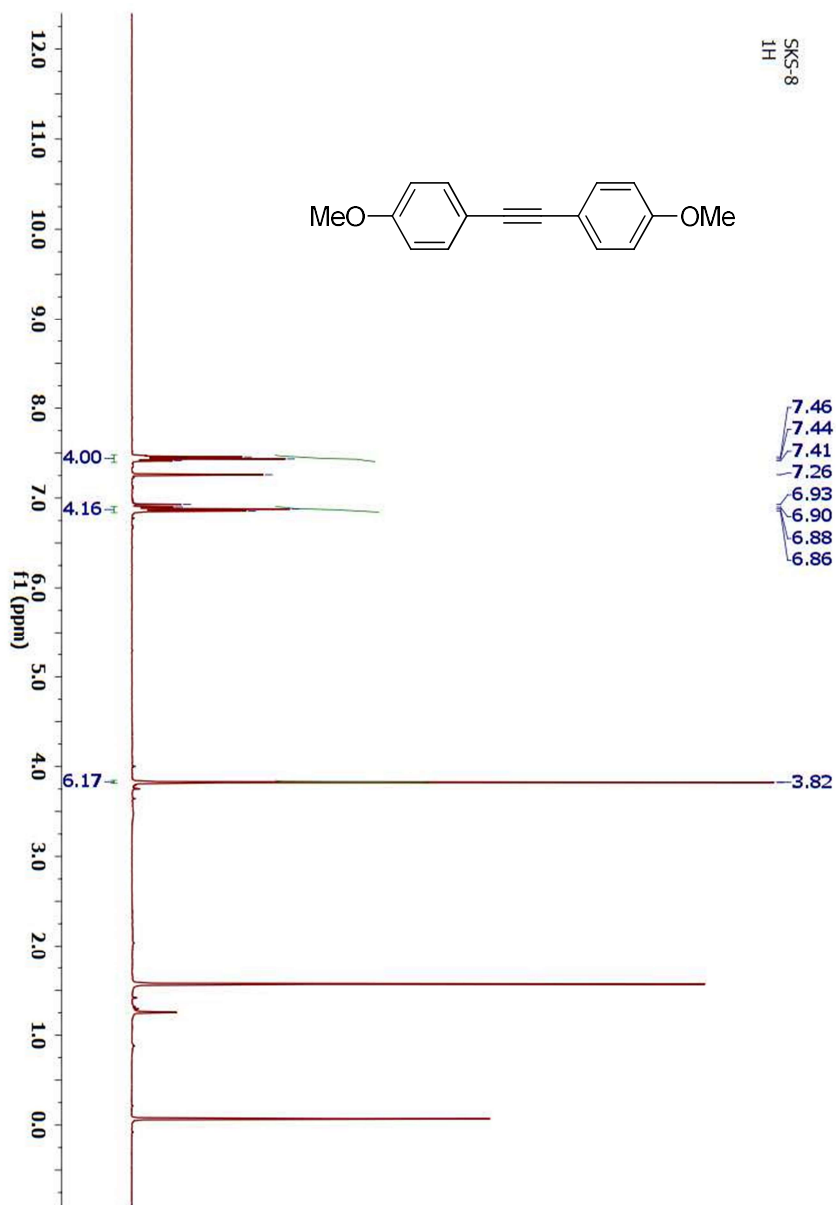

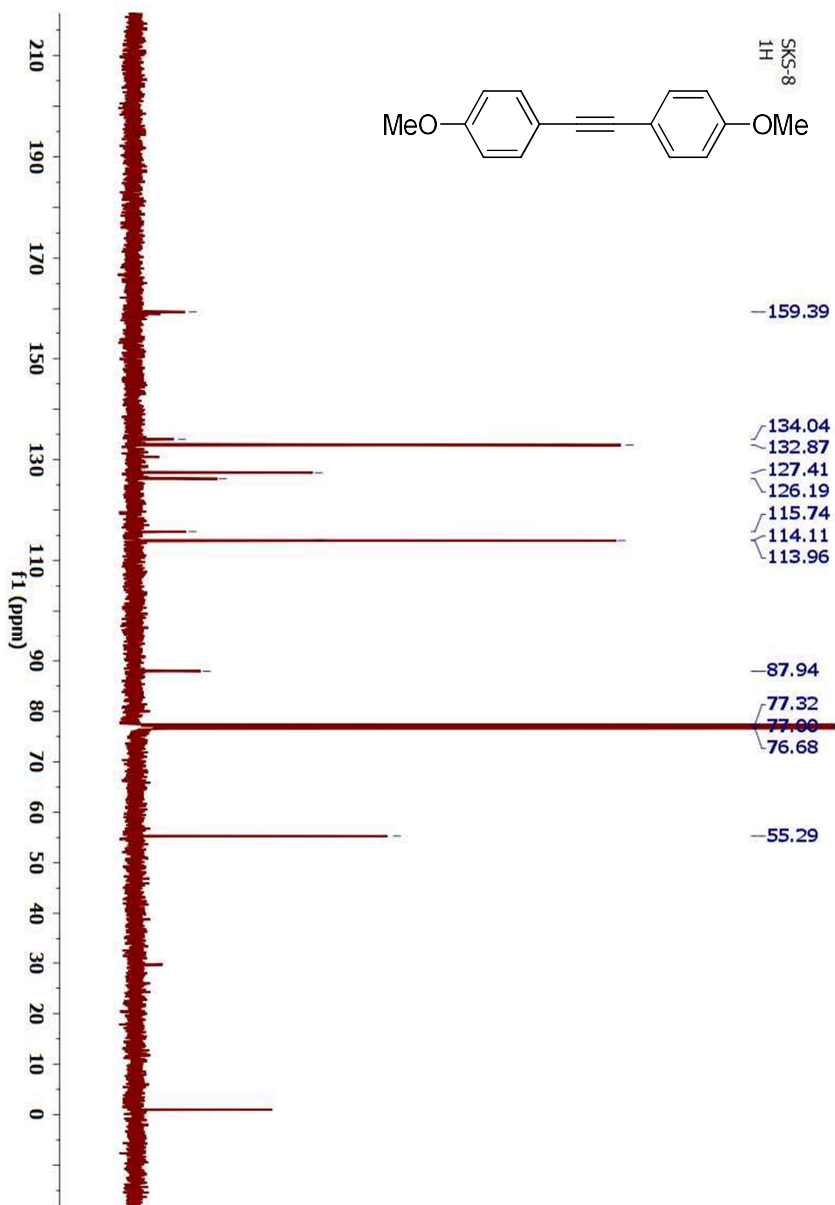

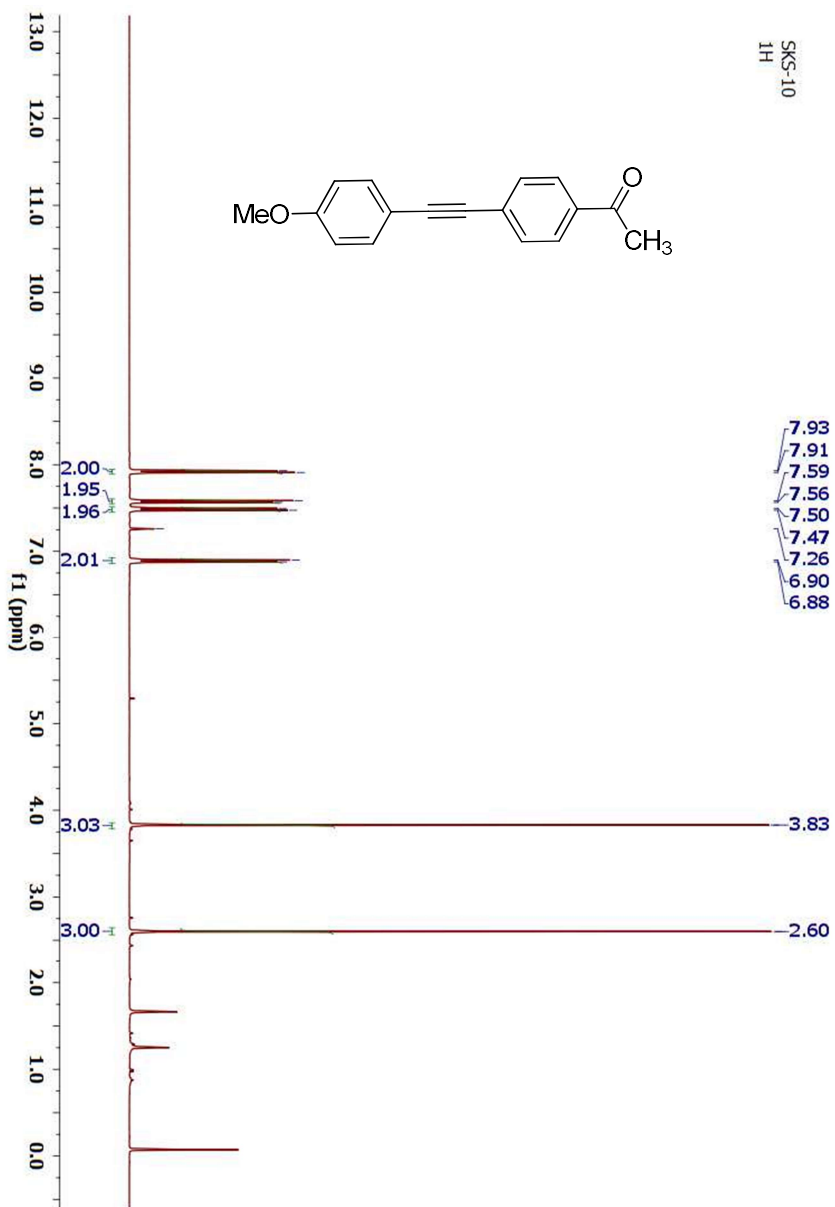

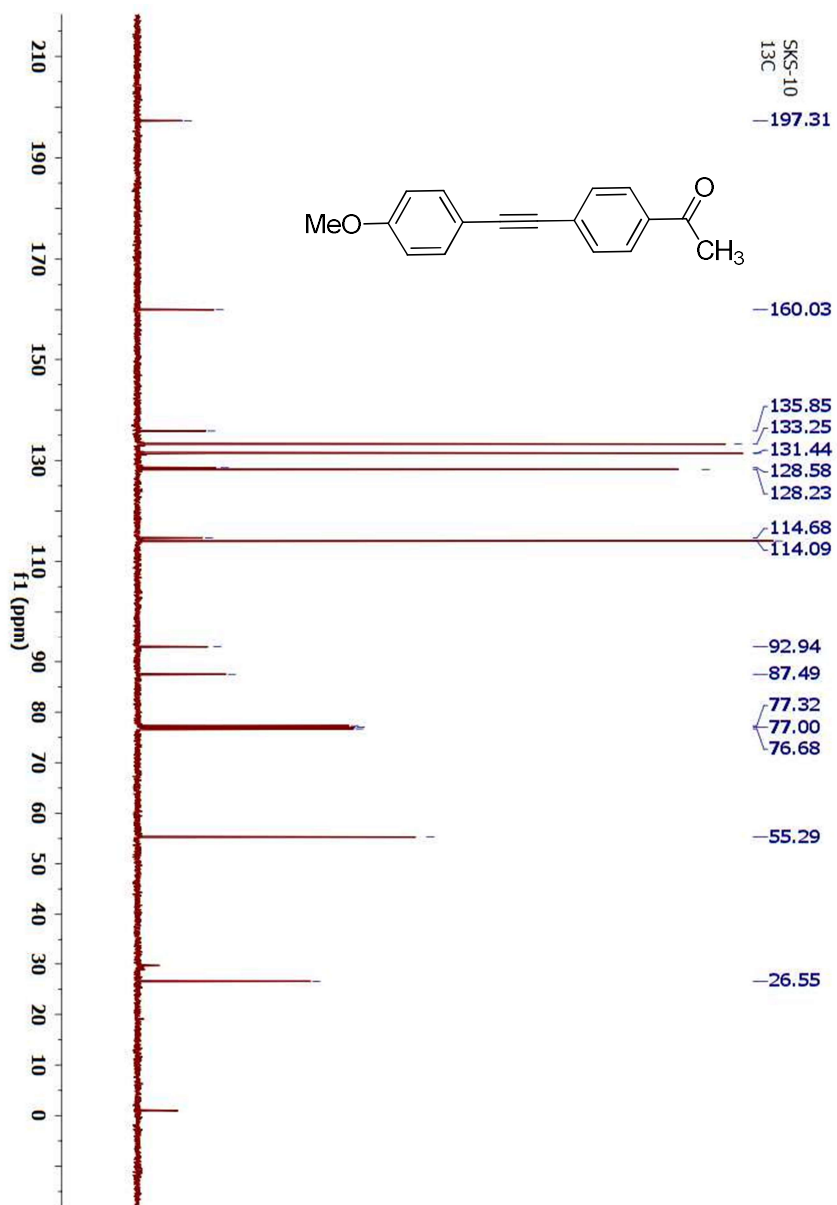

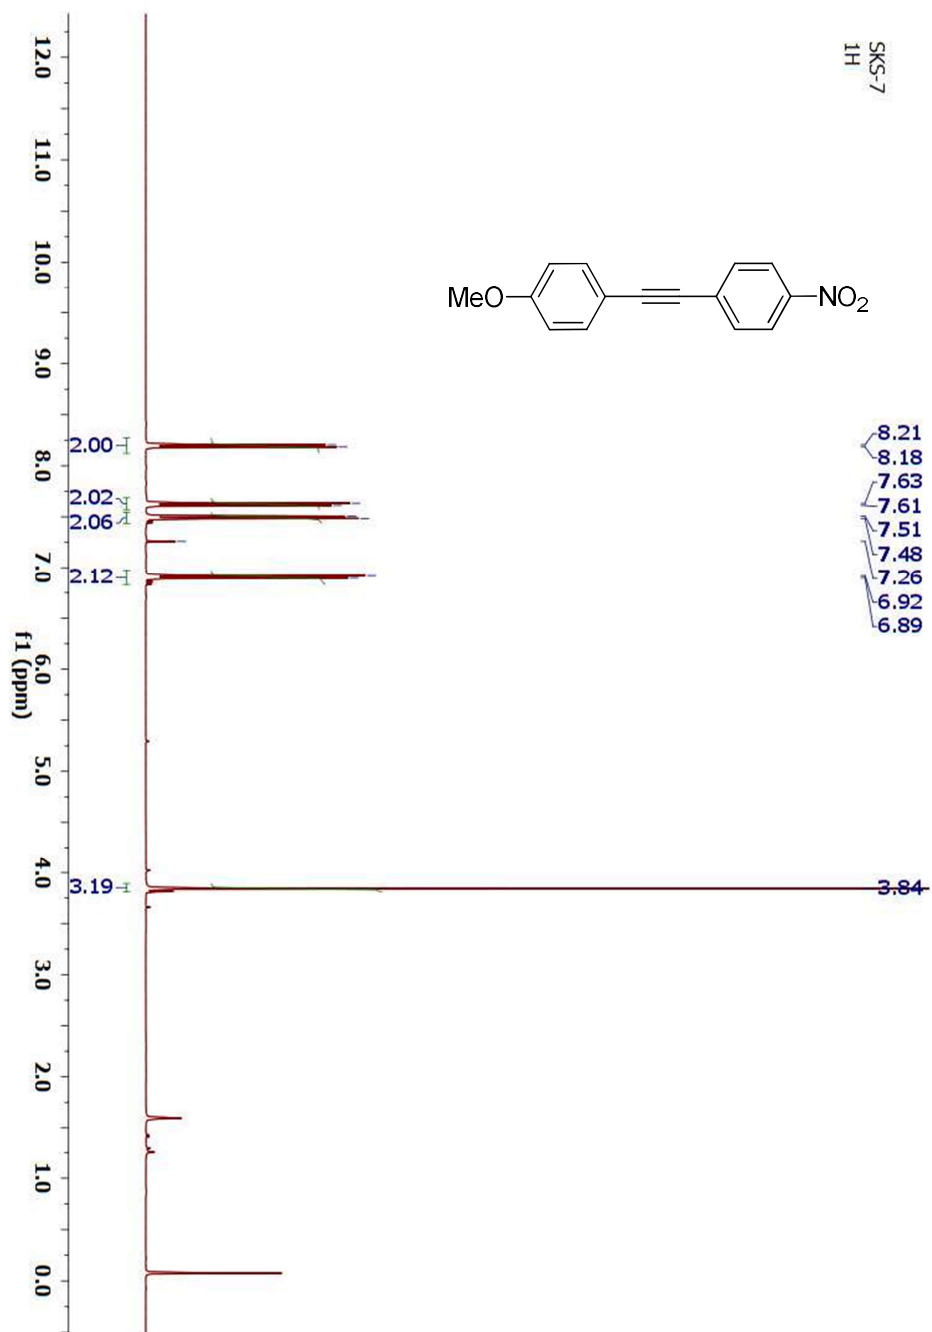



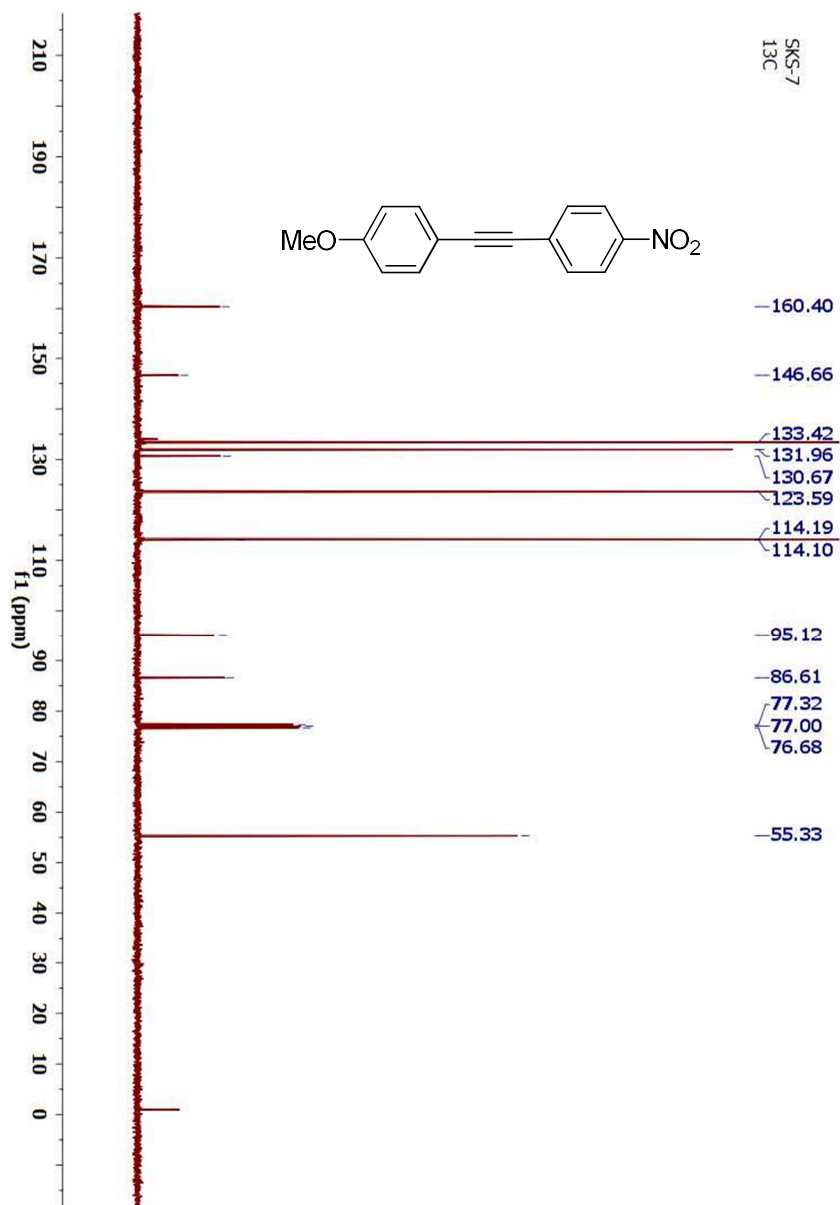

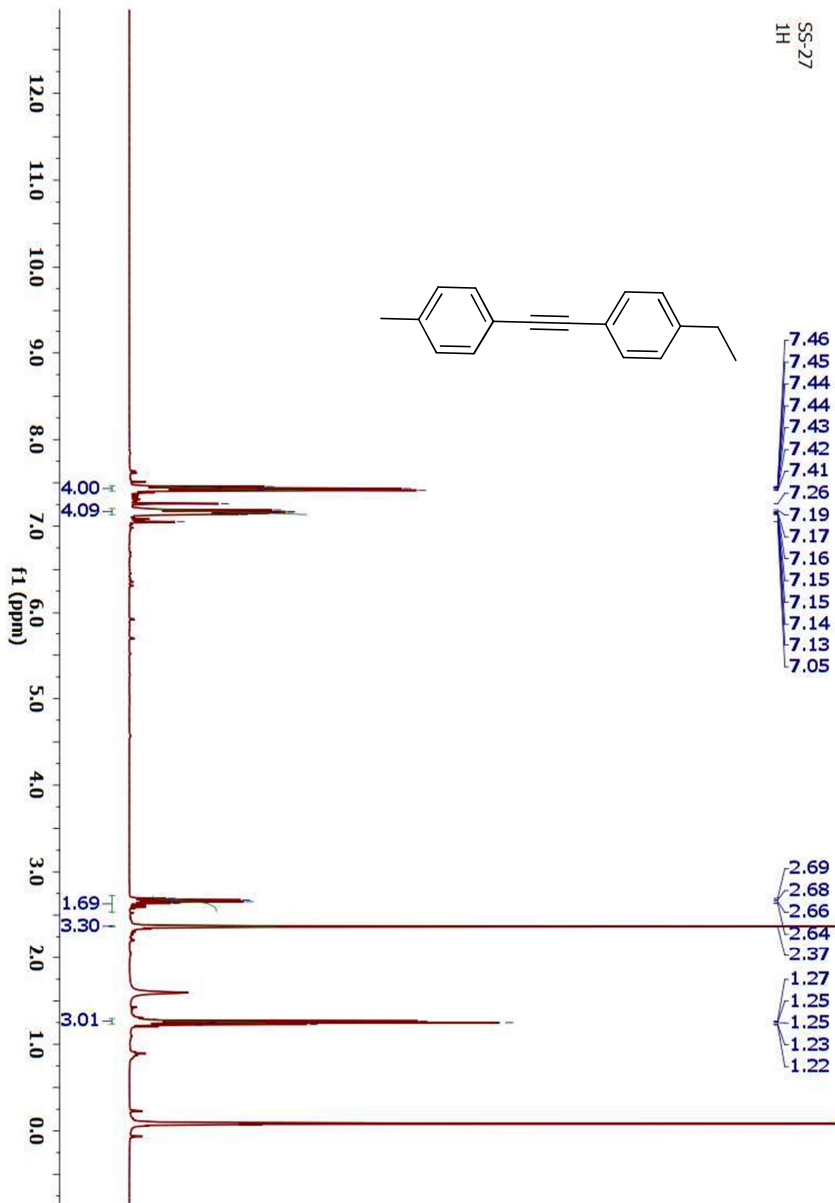

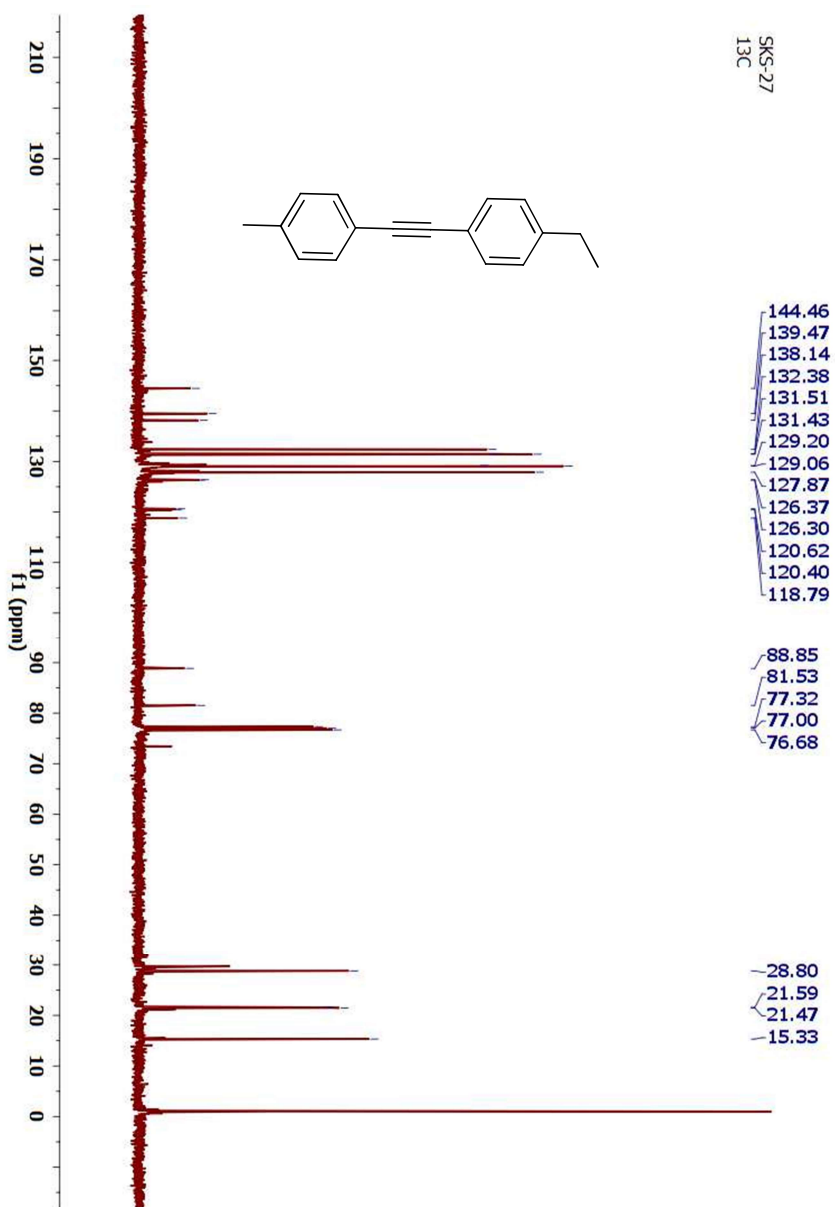

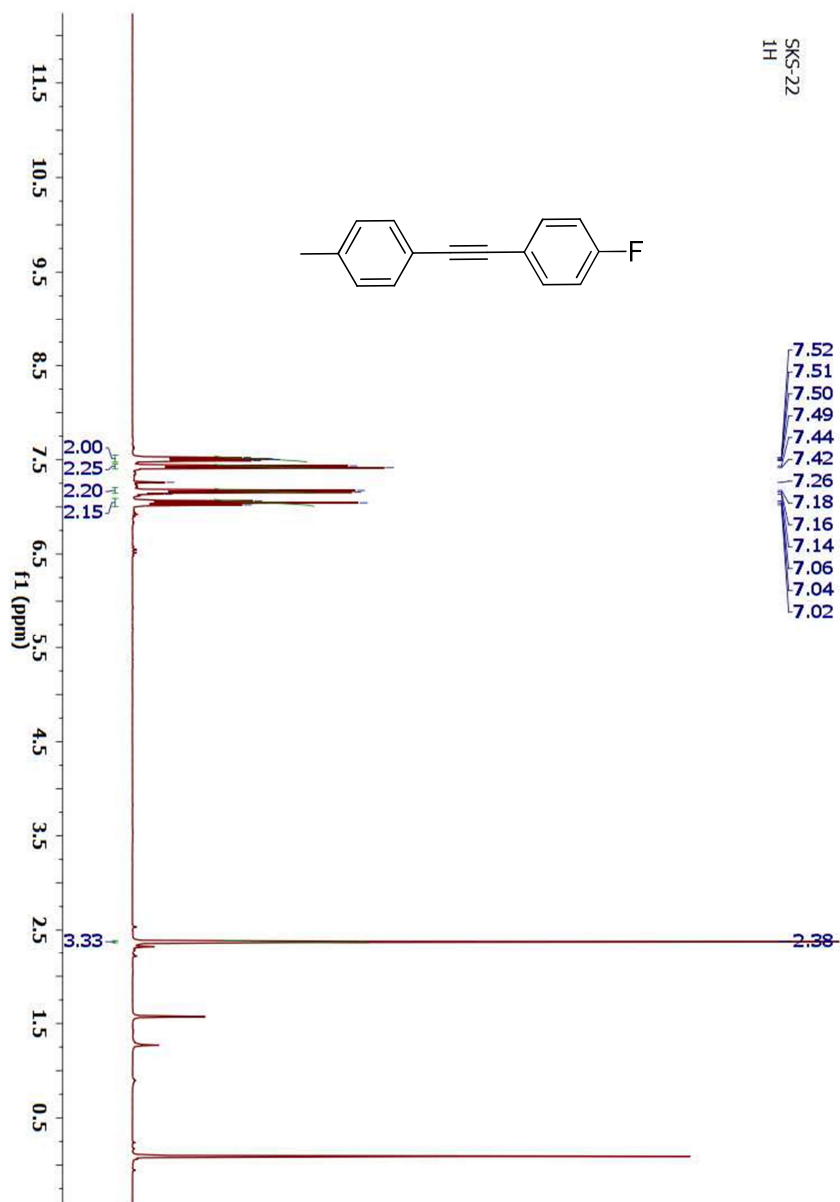

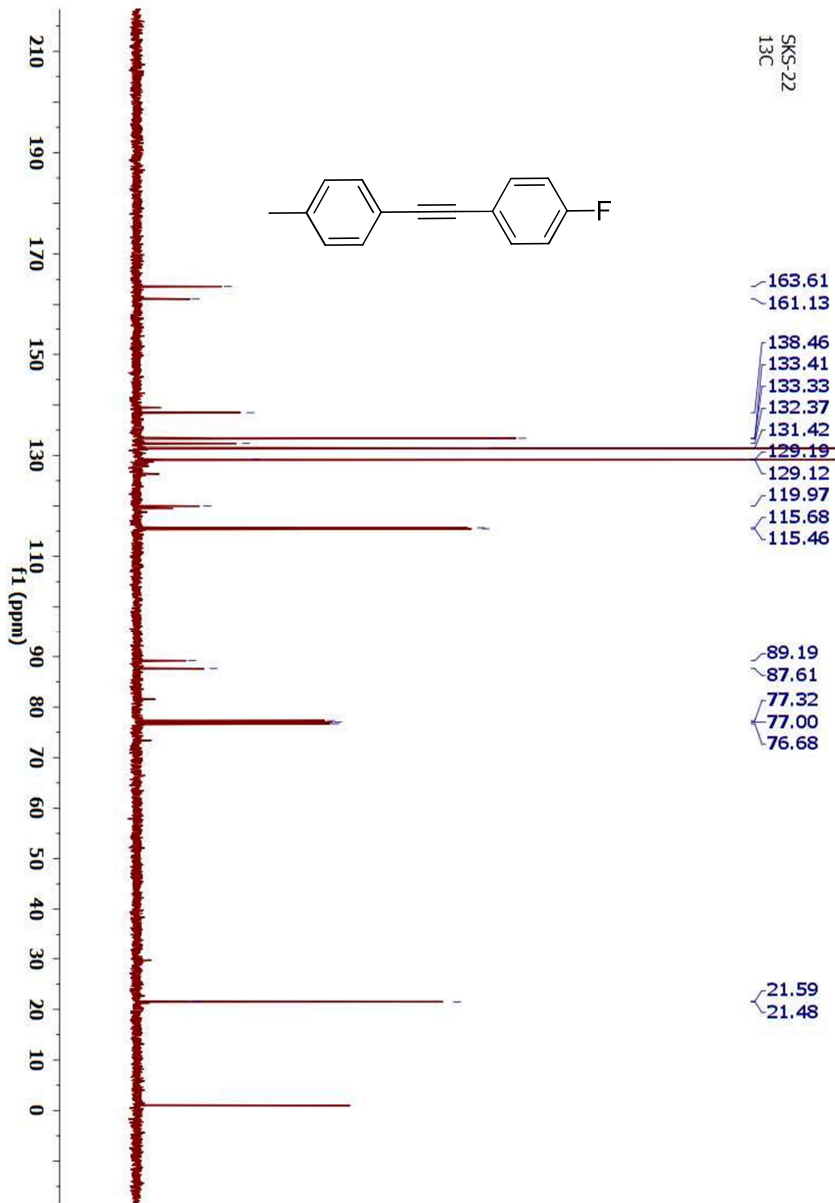

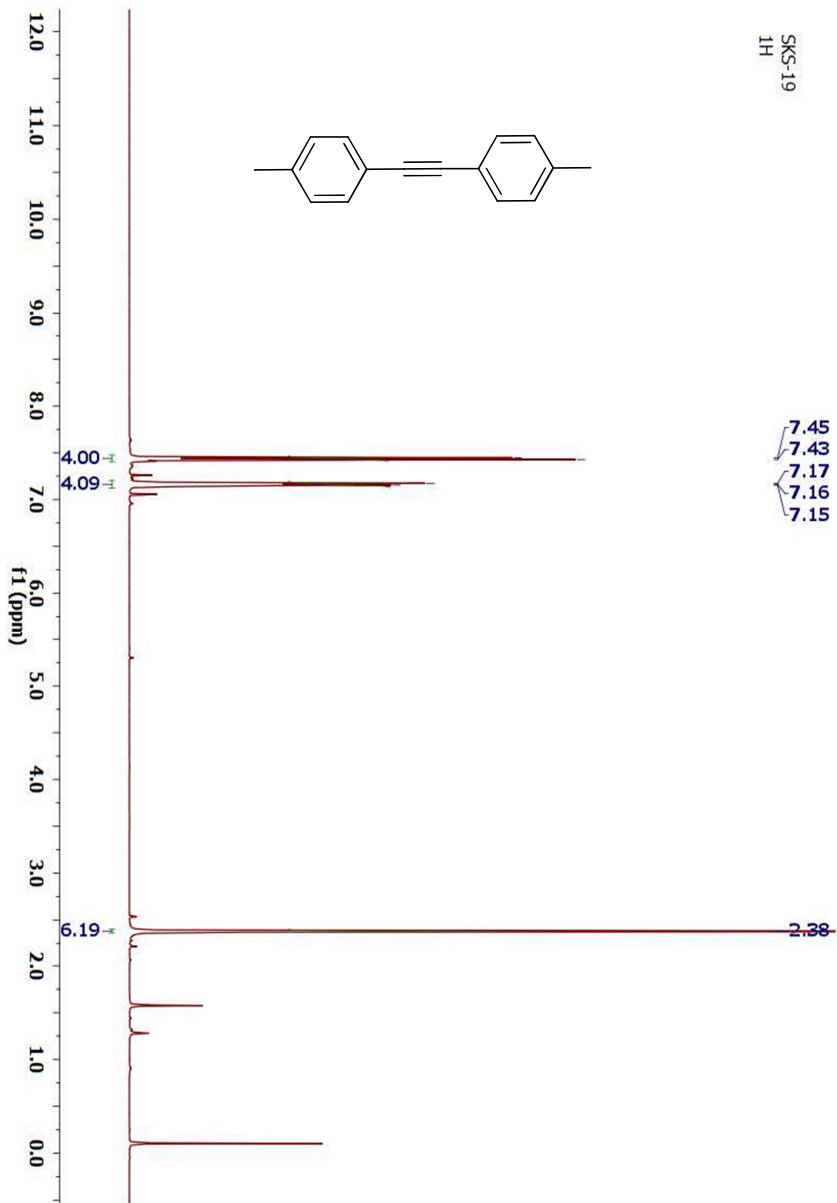

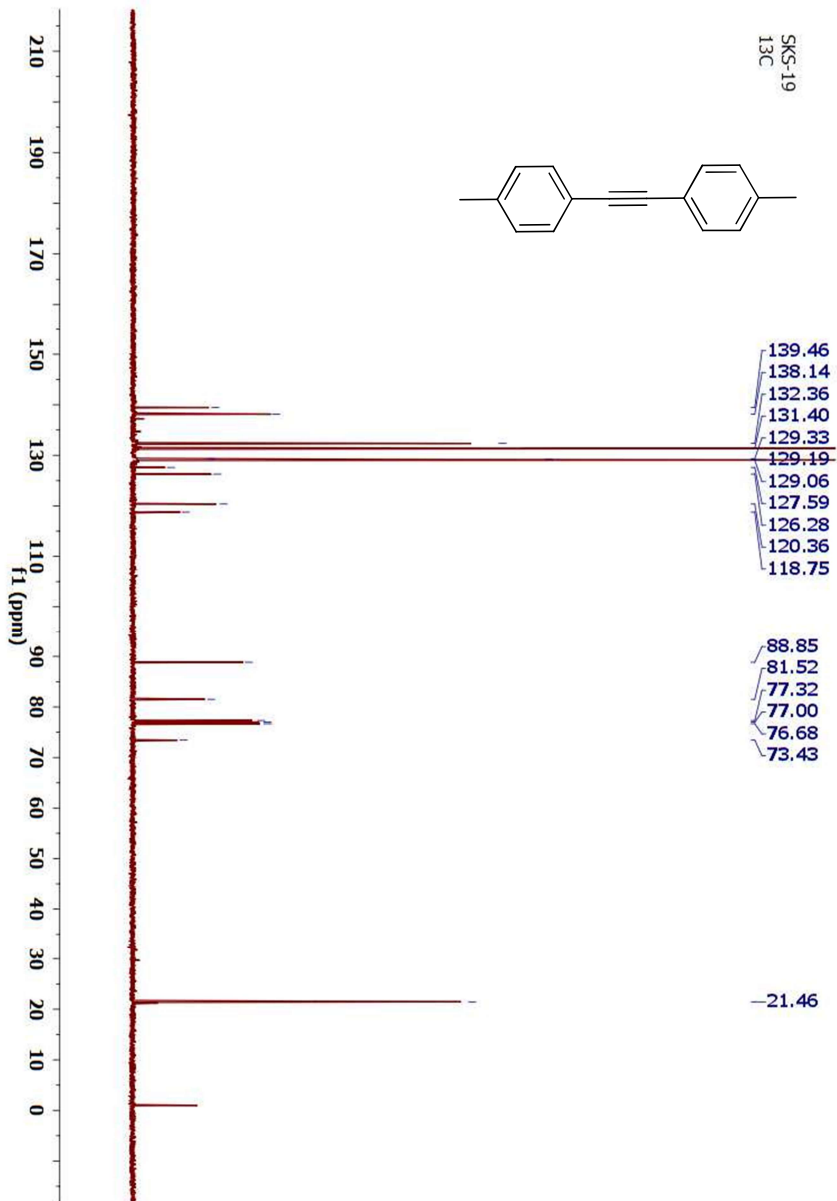

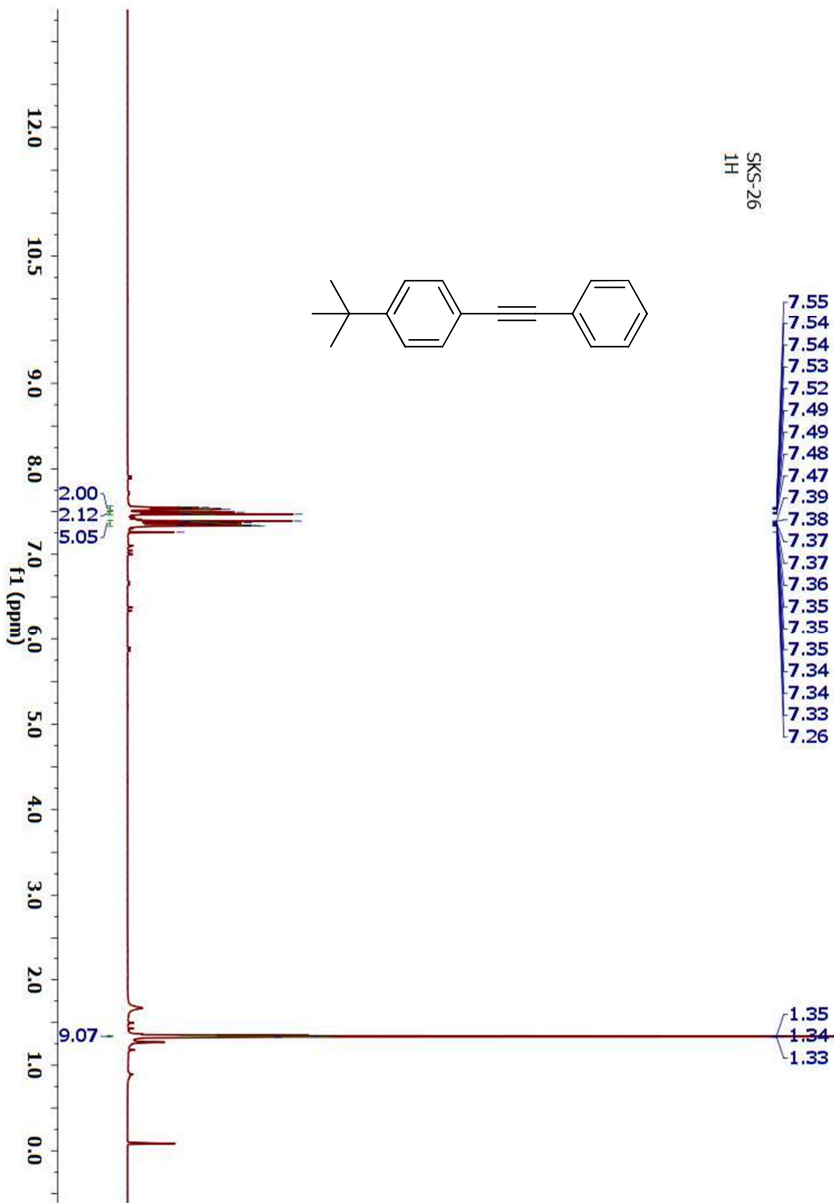



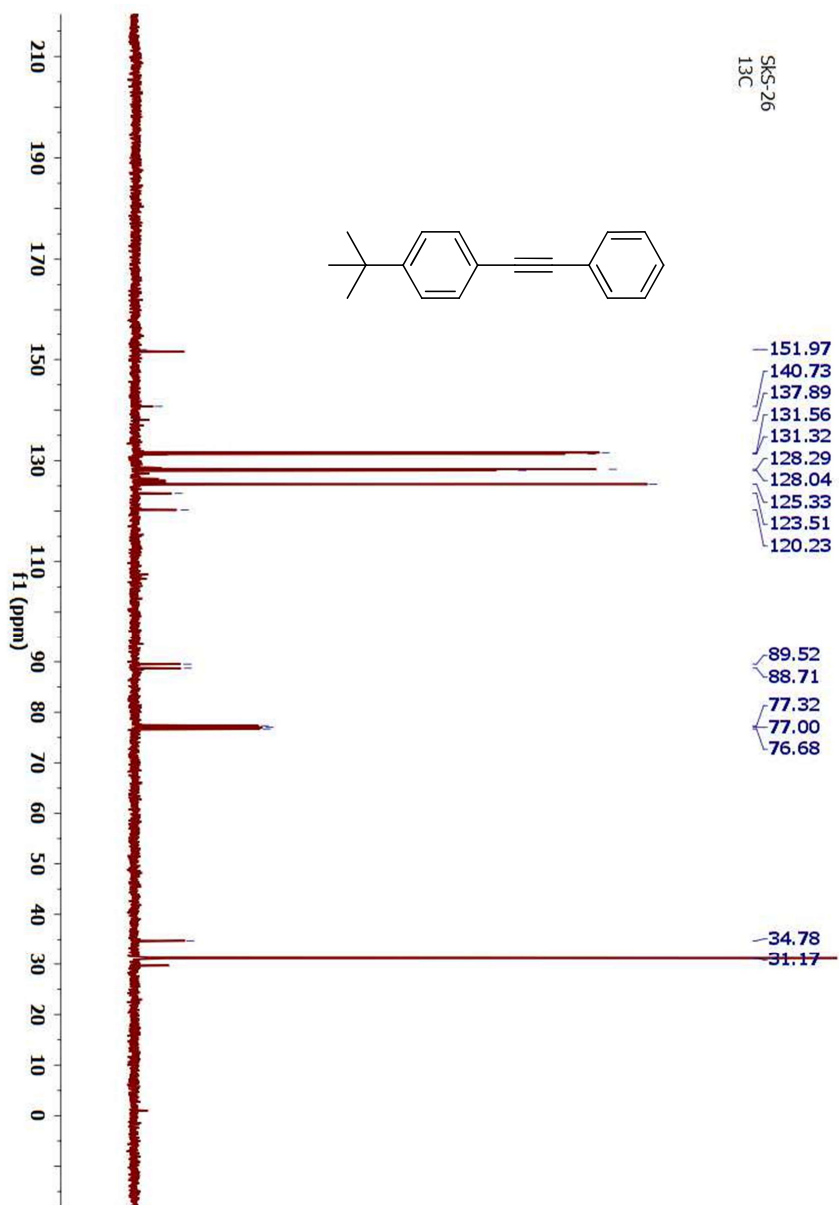

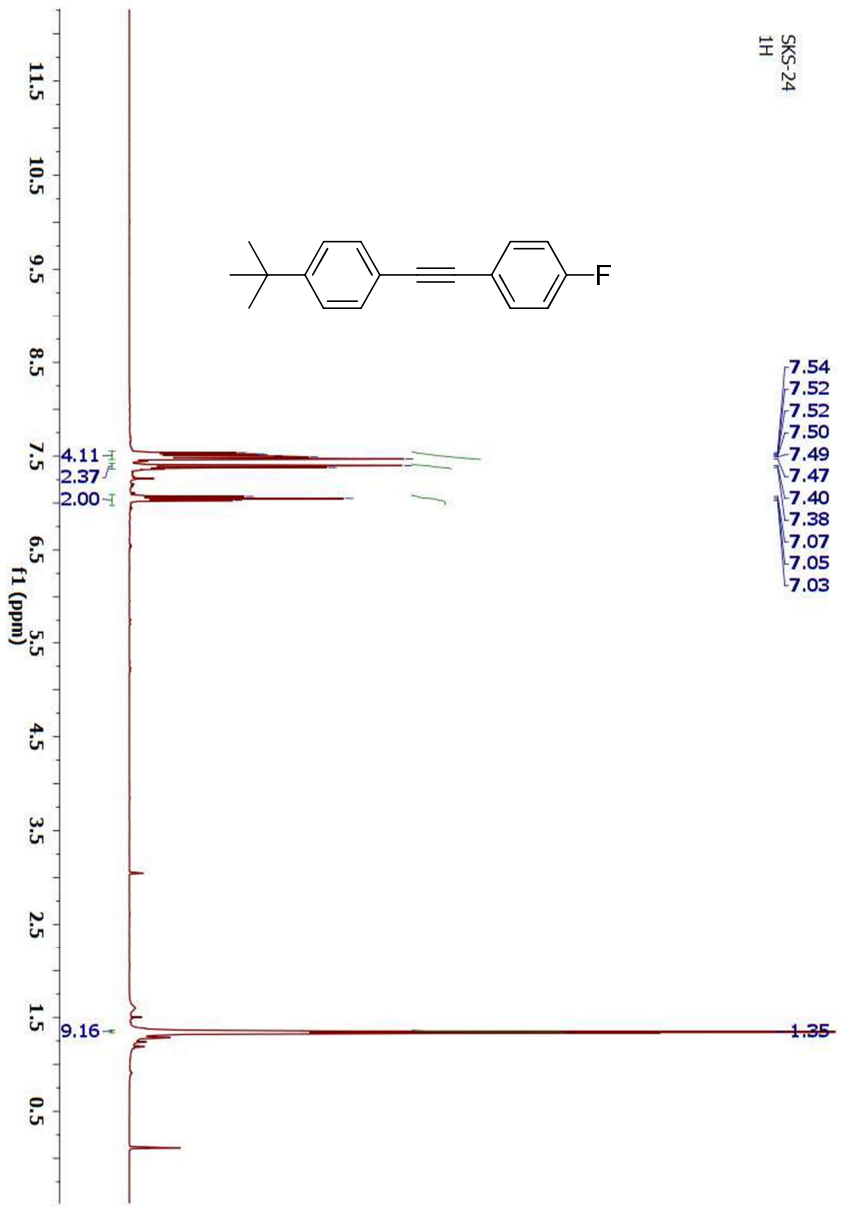

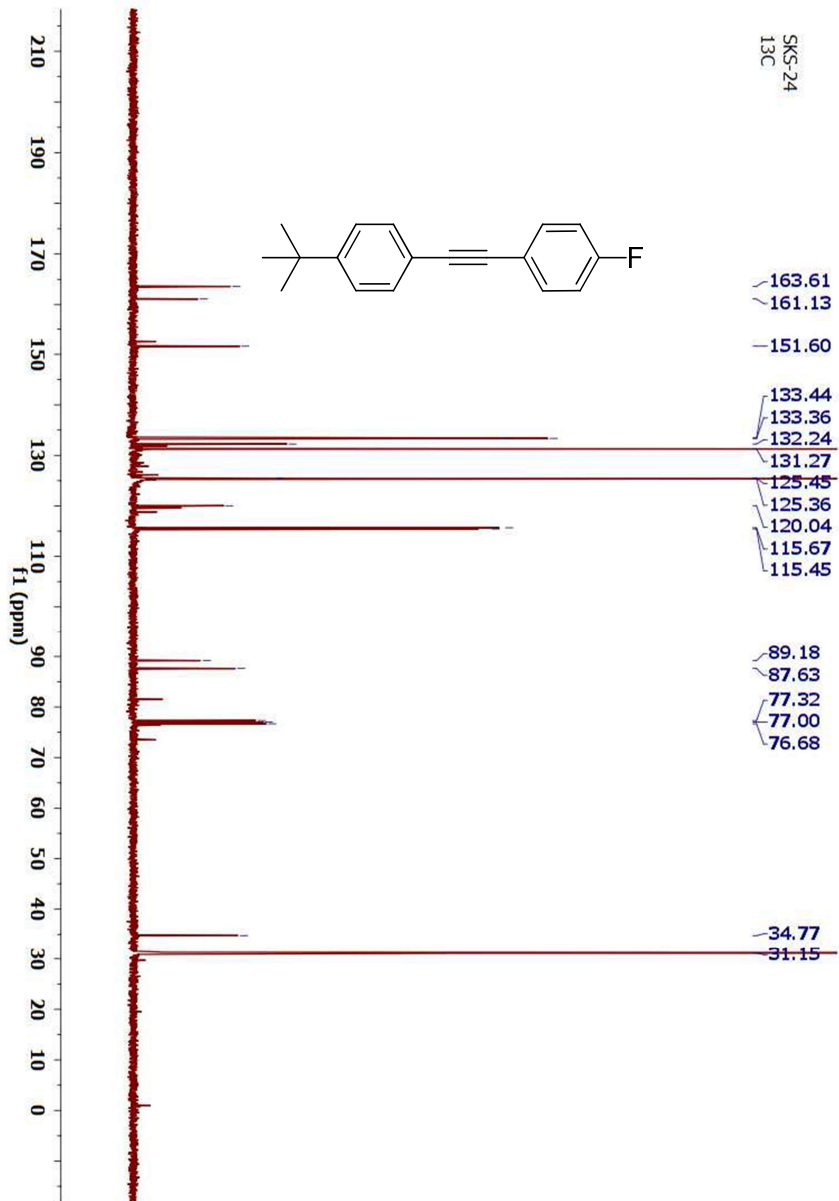

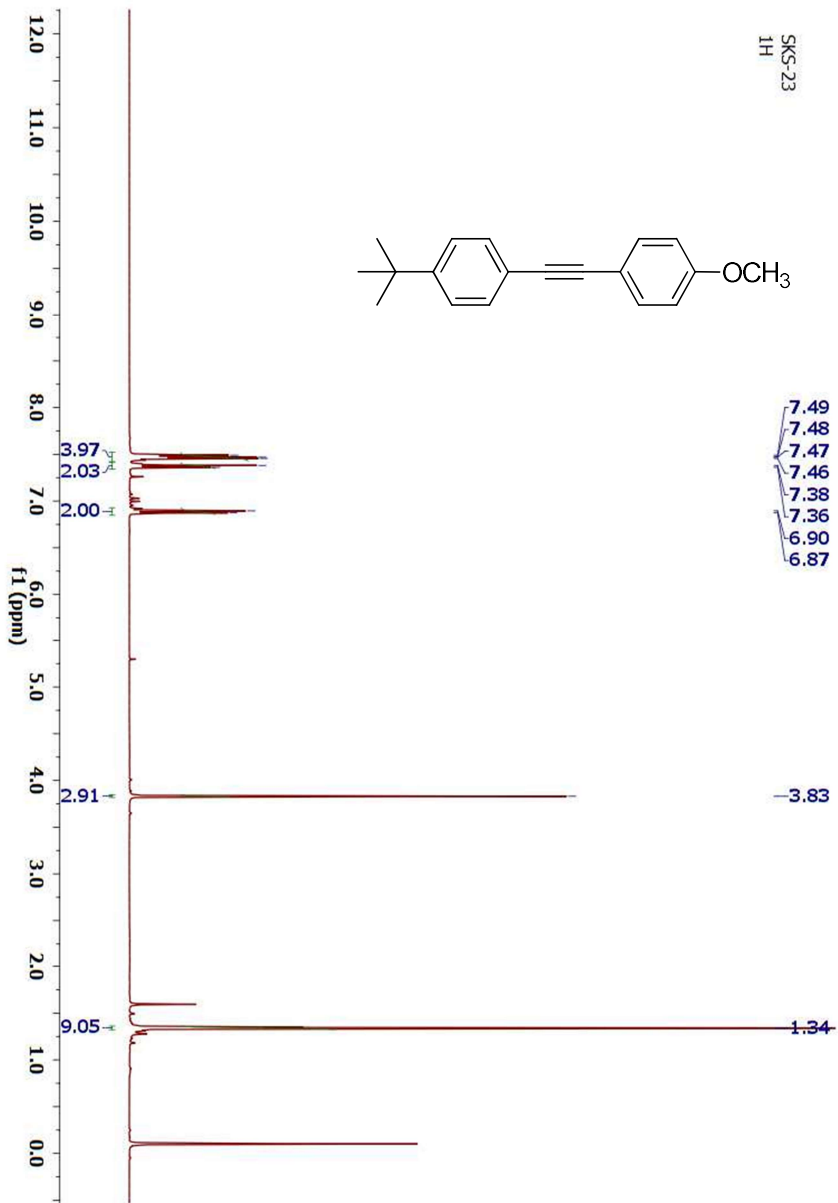

SKS-23  
13C

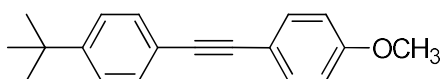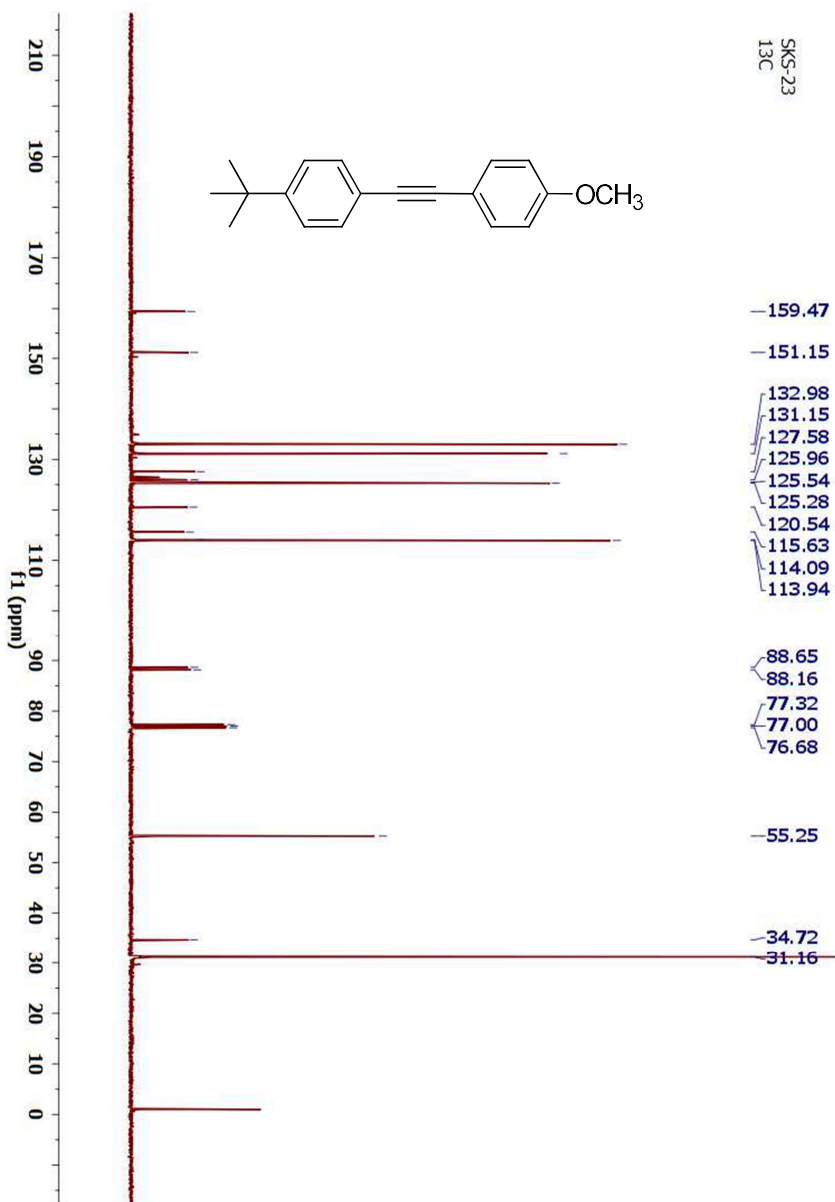

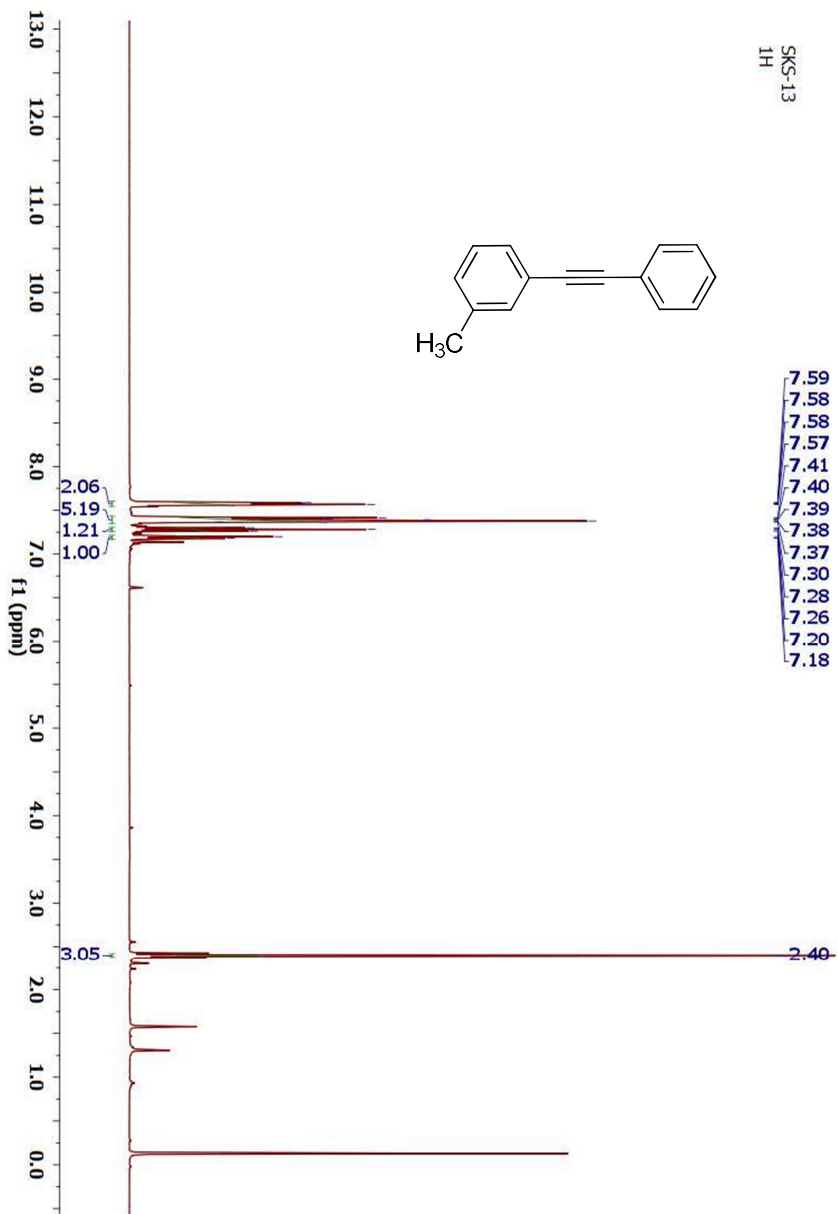

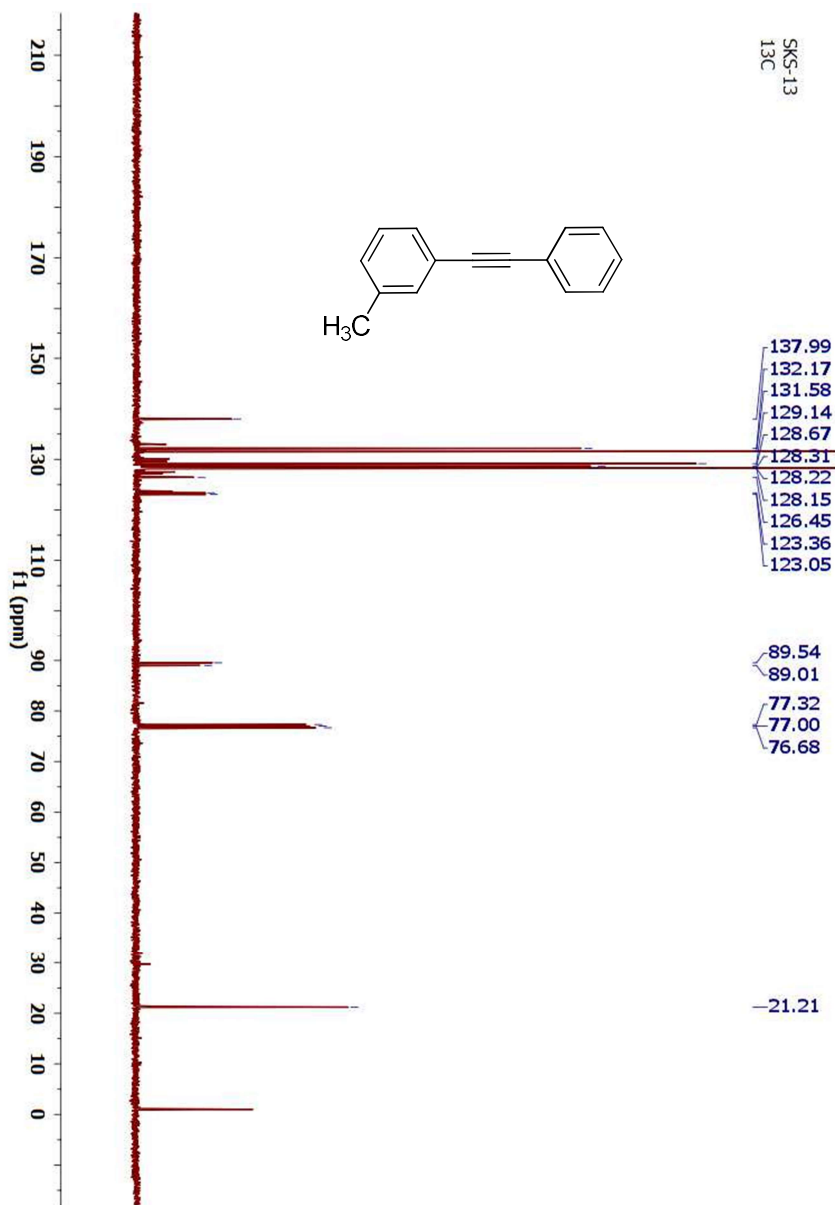

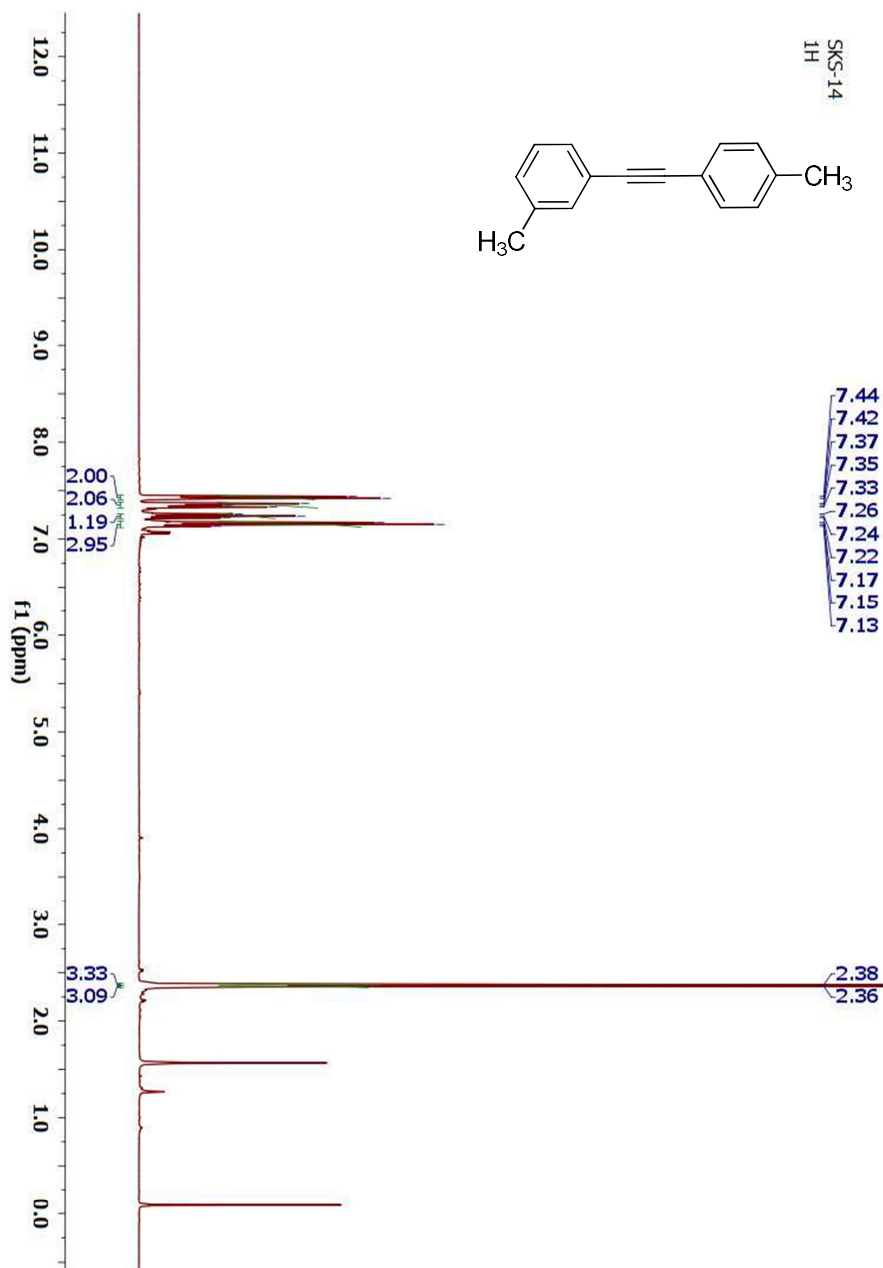



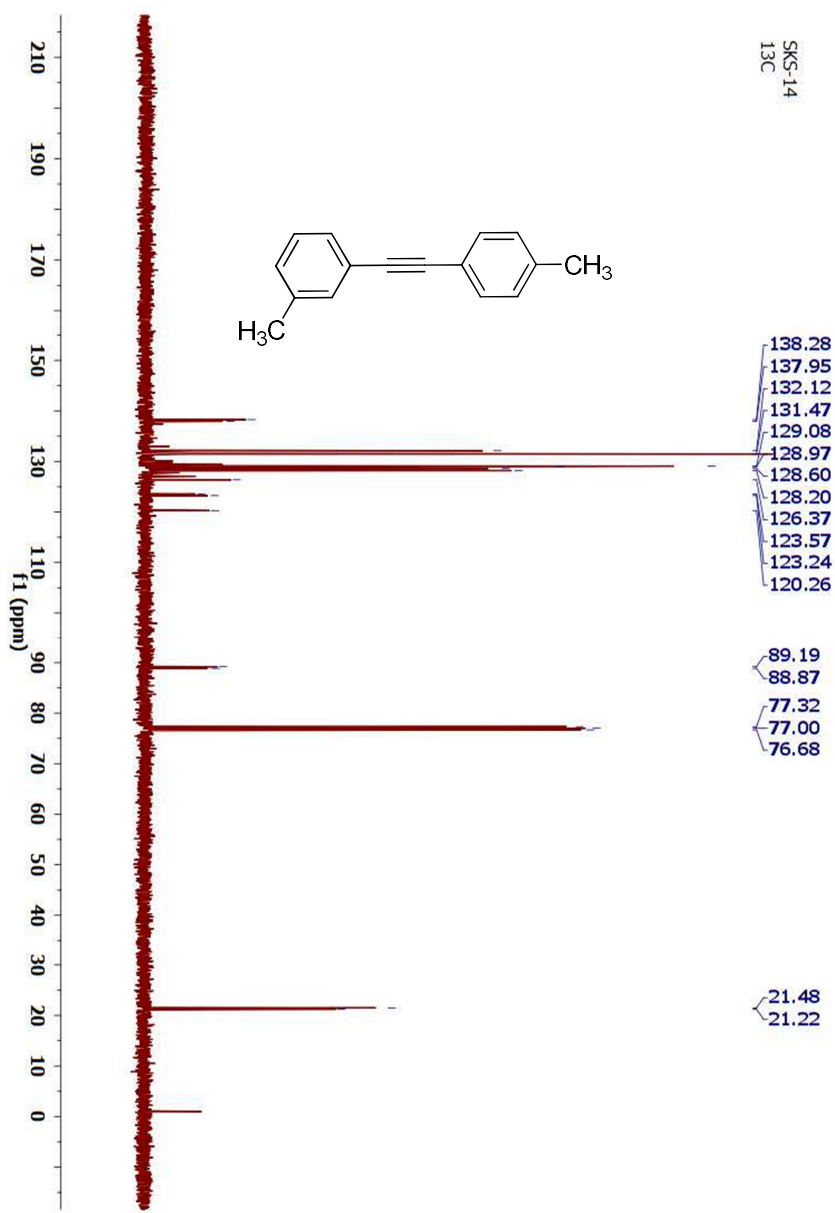

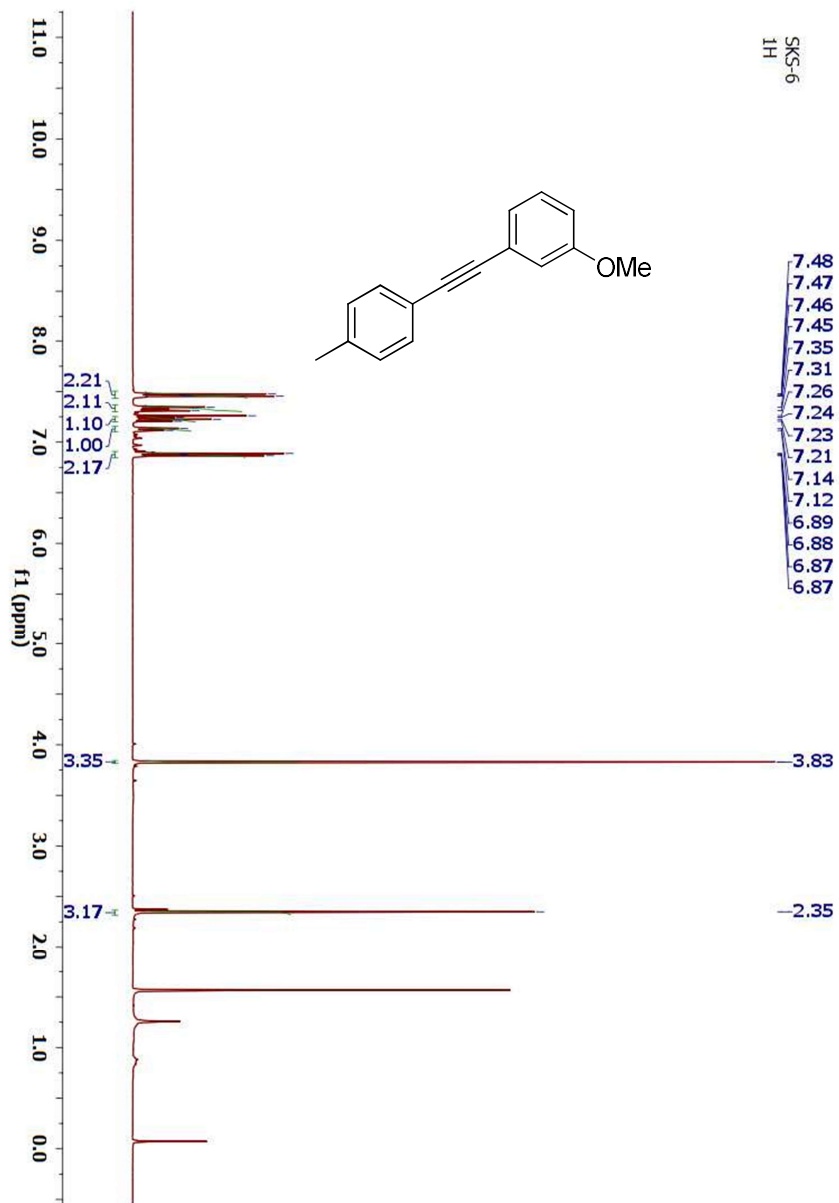

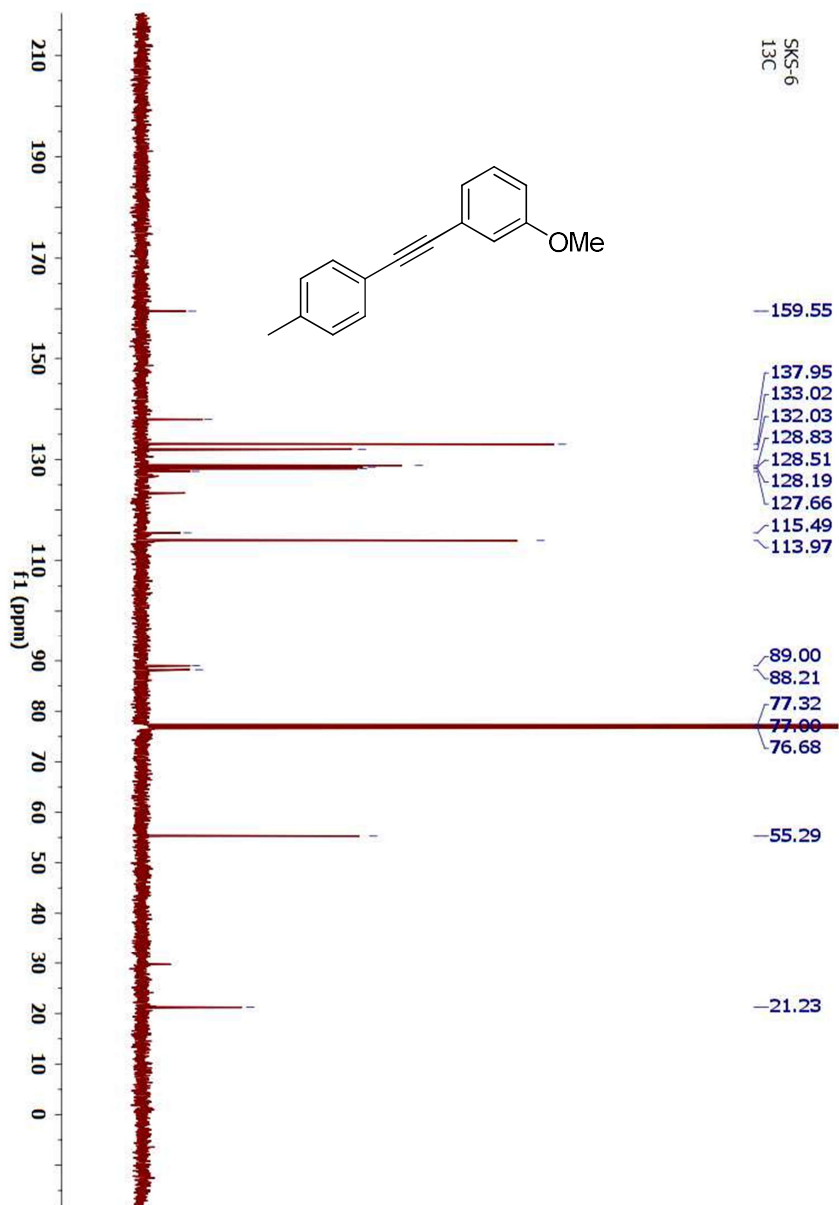

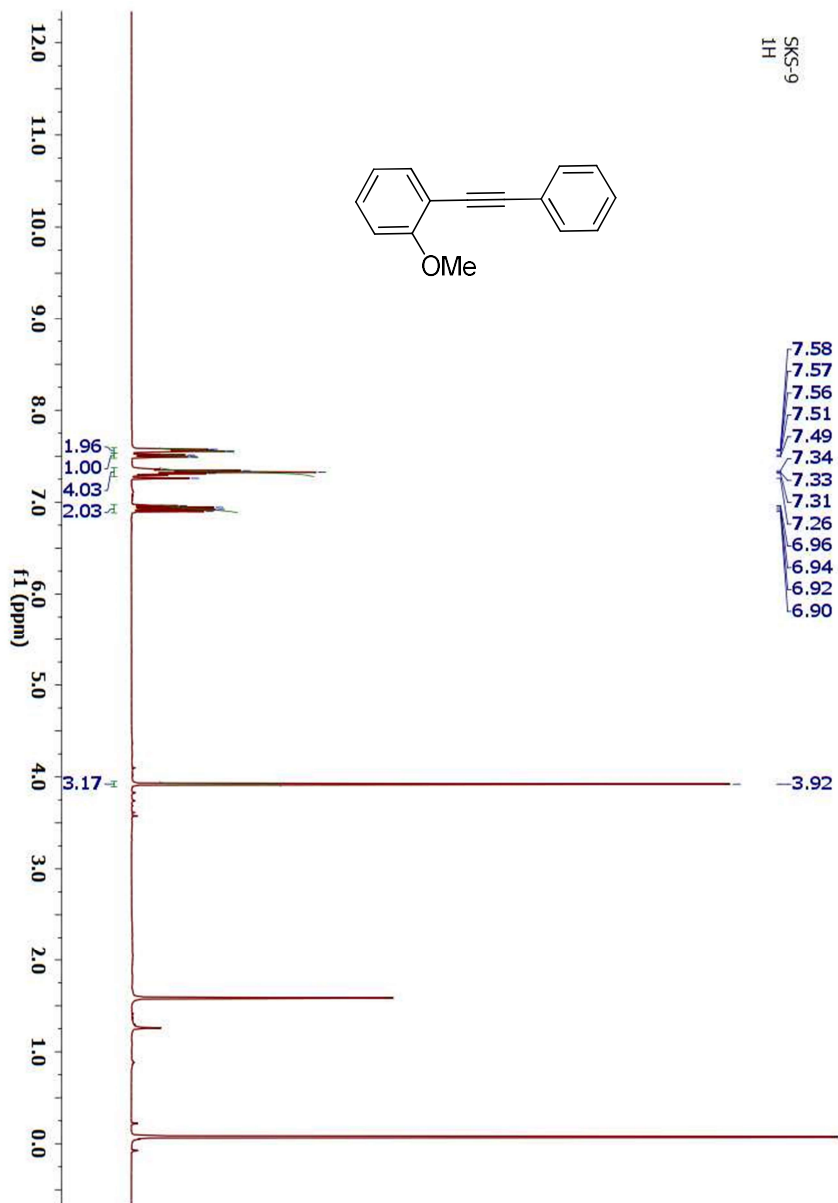

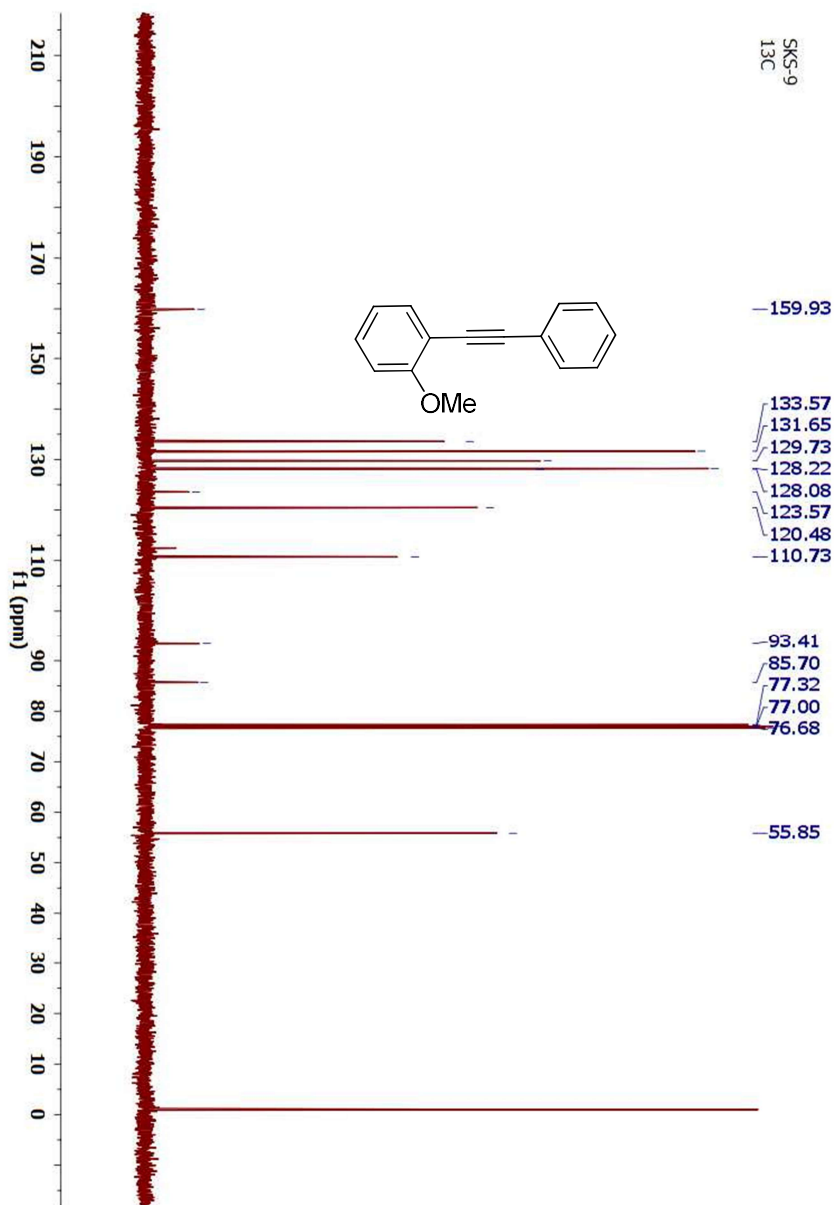

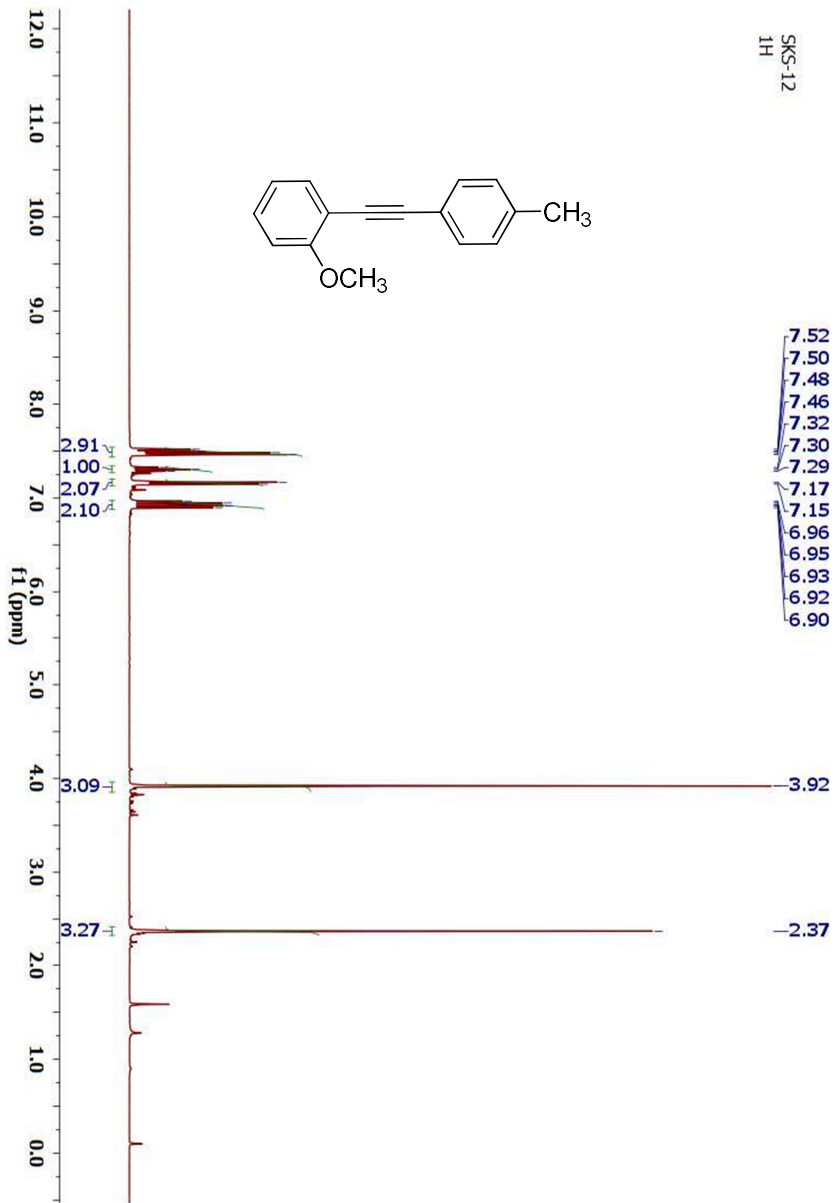

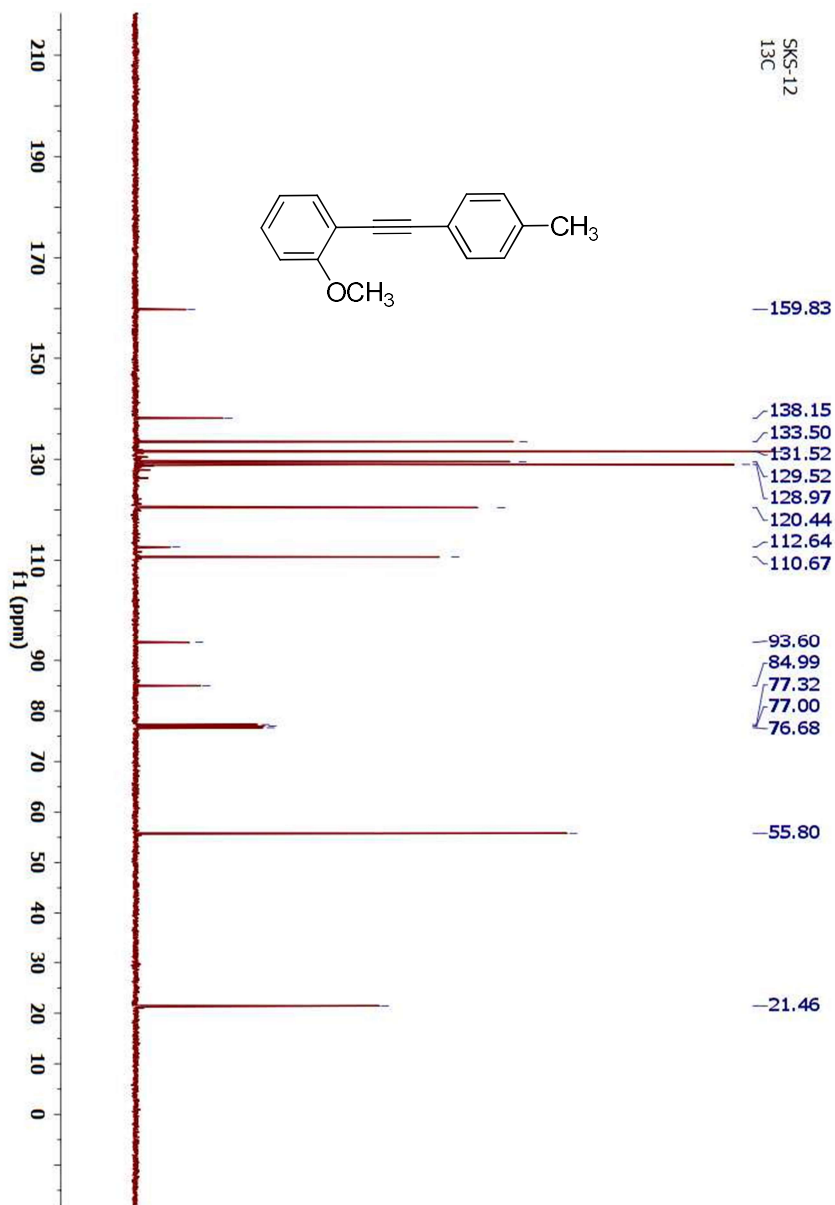

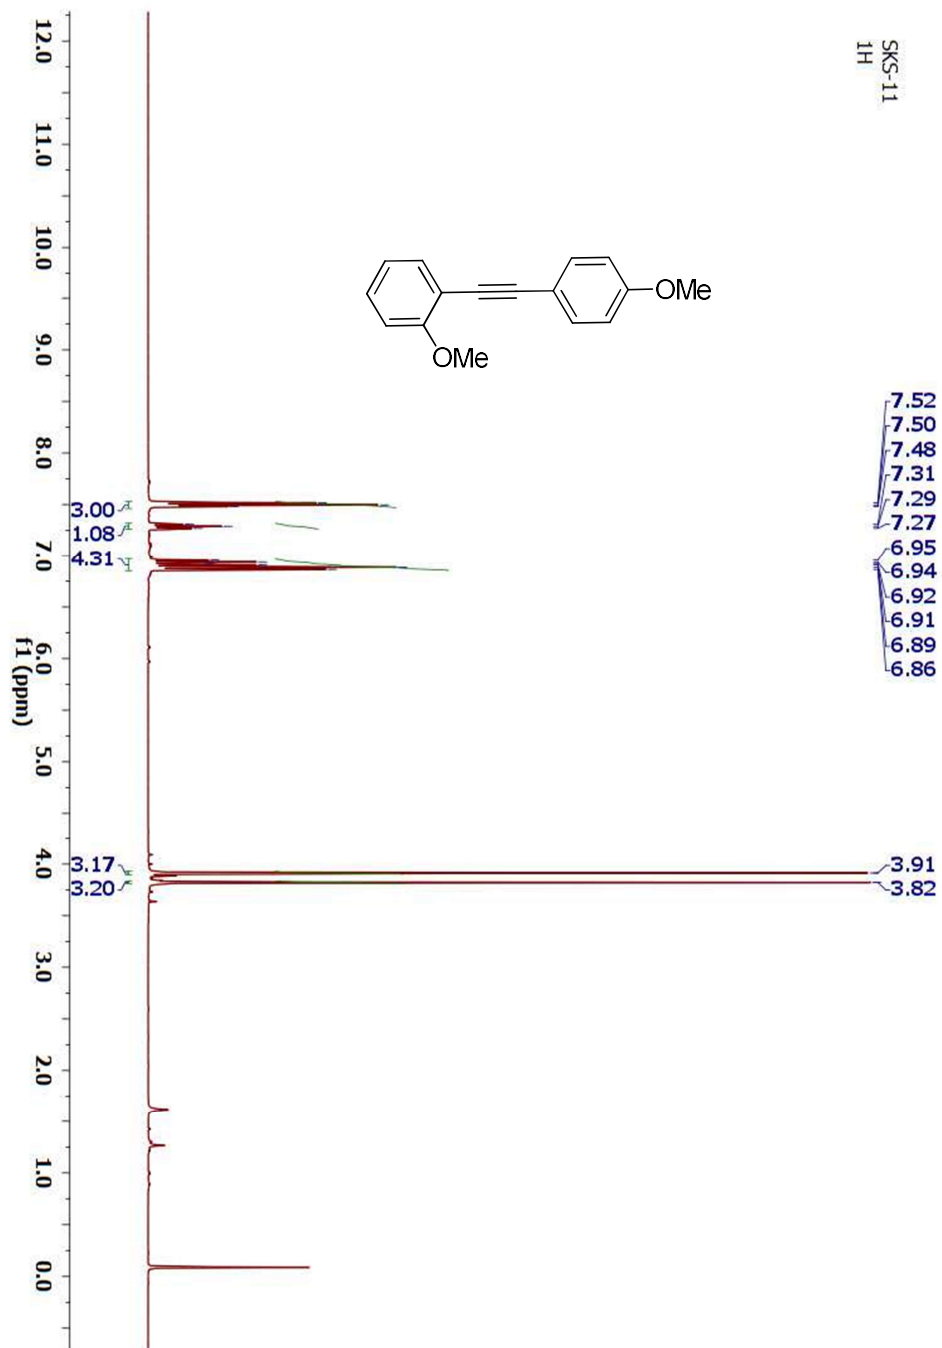



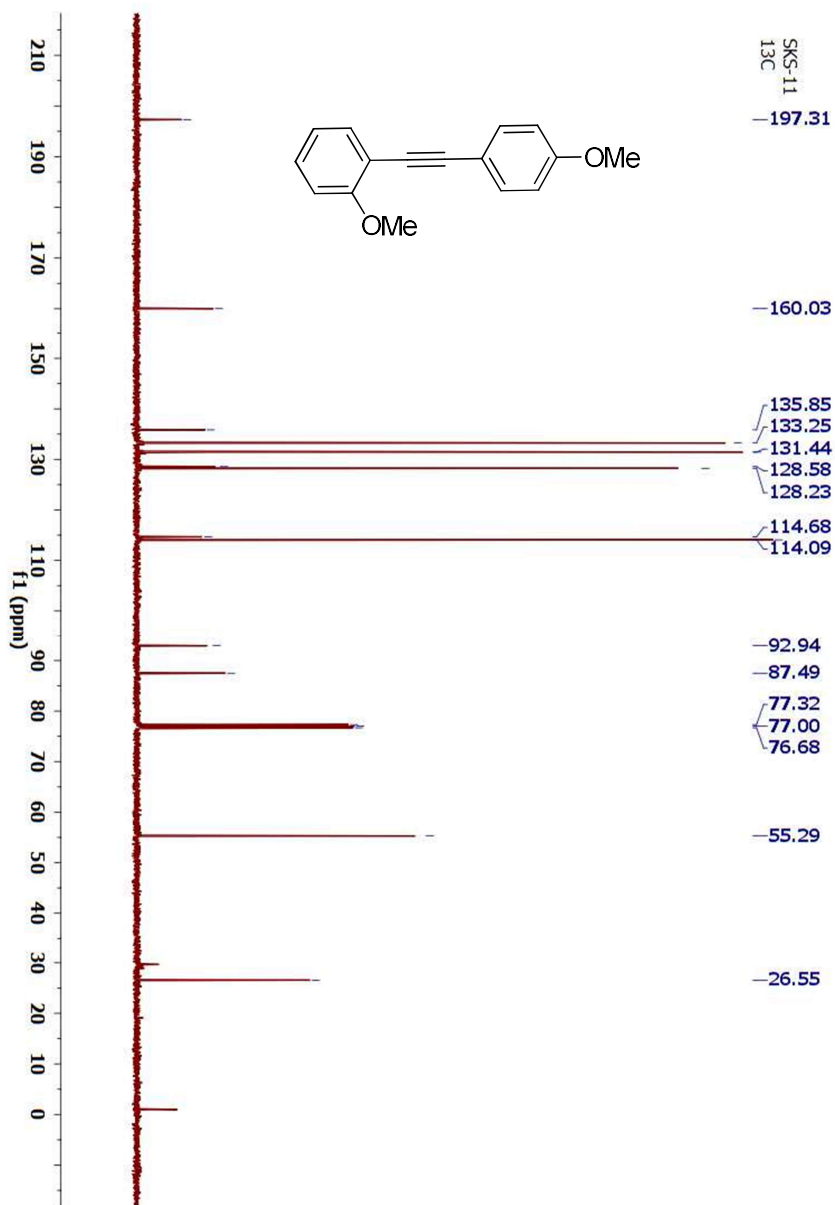

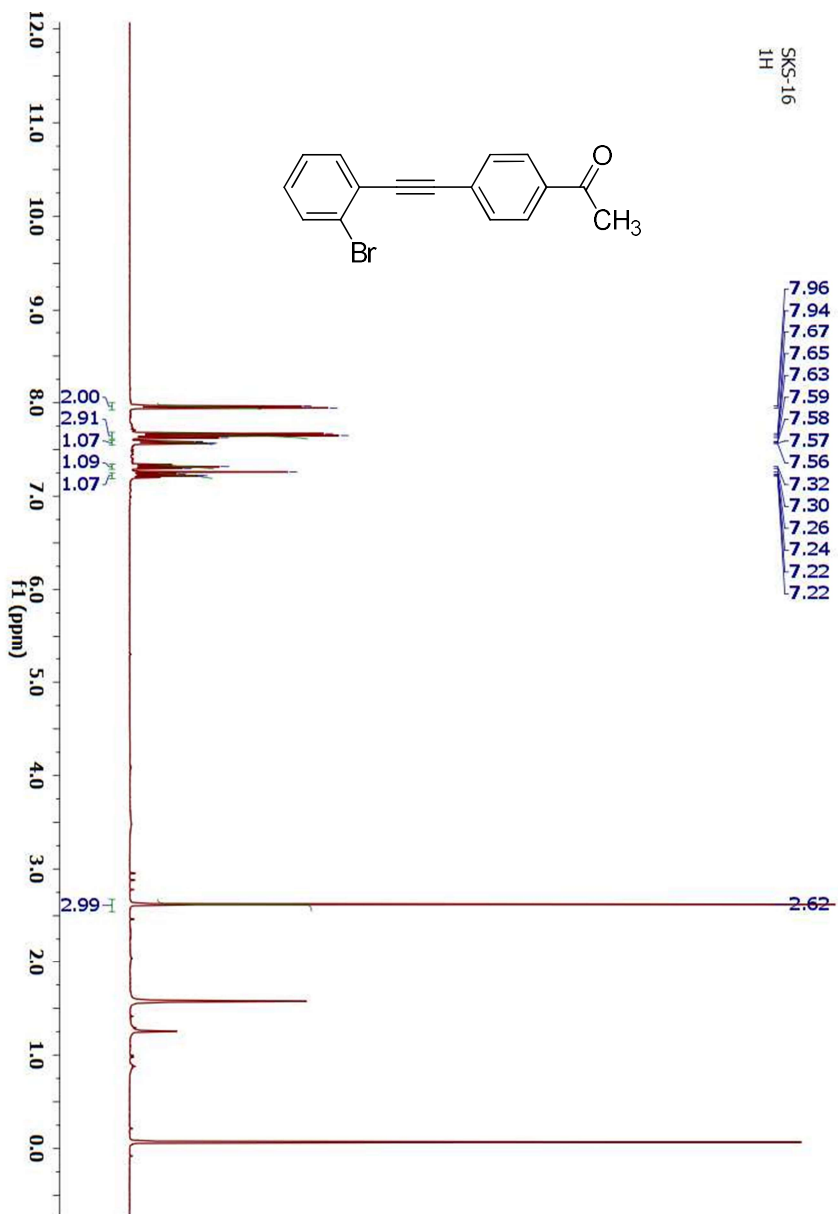

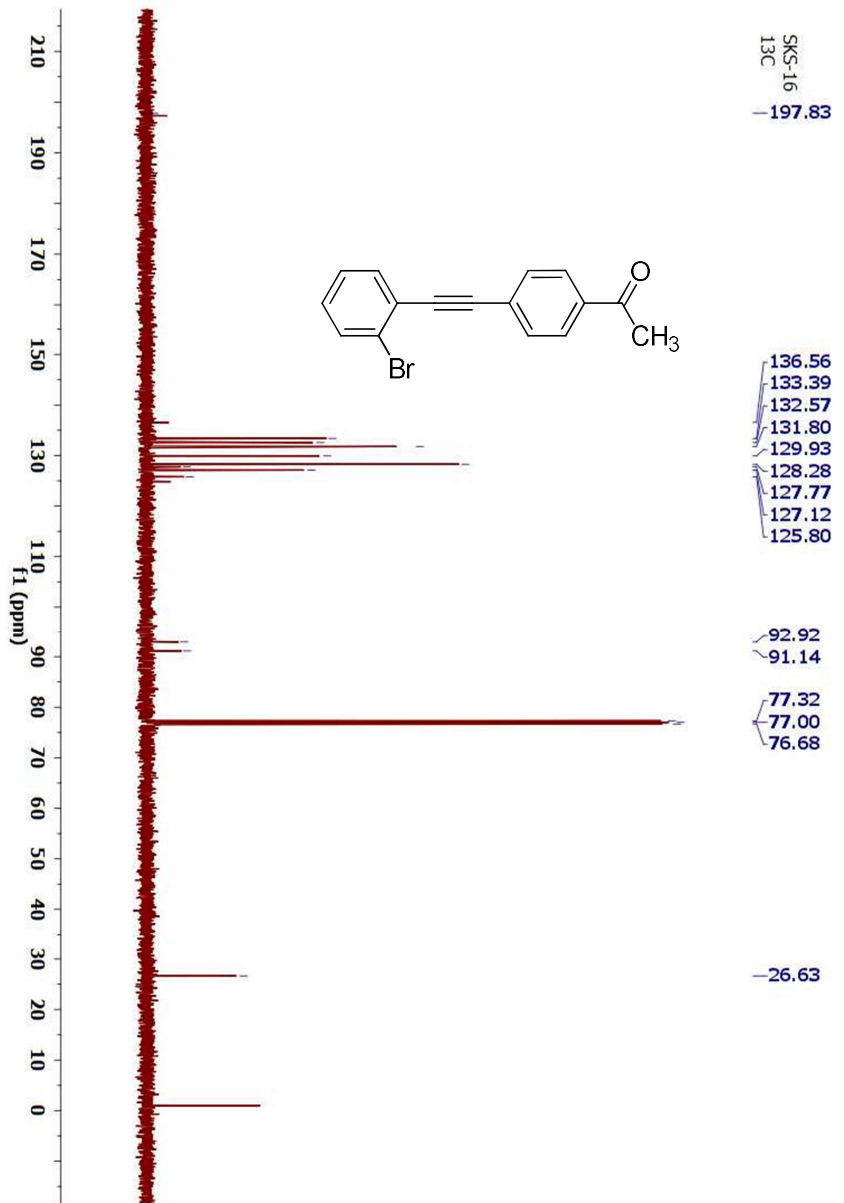

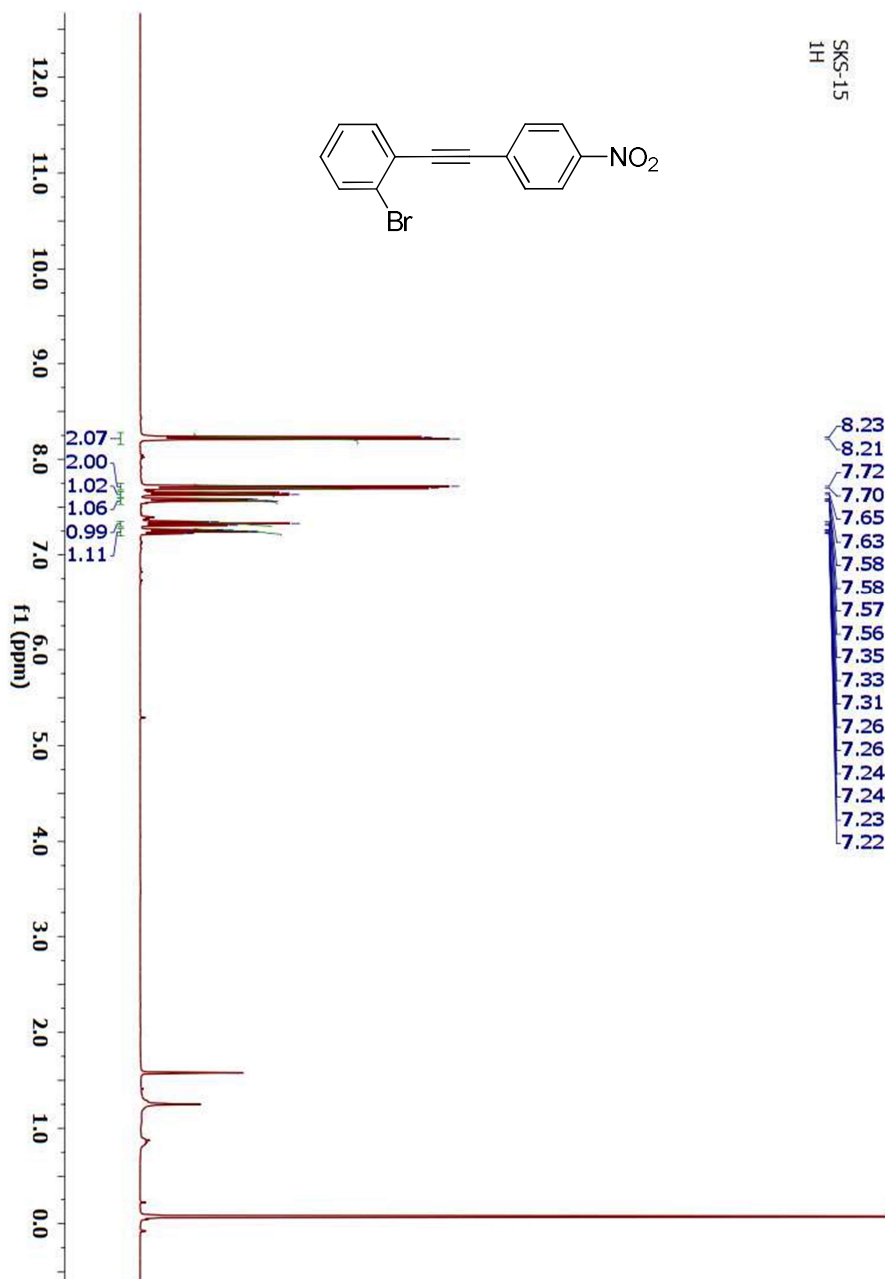

SKS-15  
13C

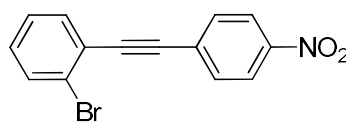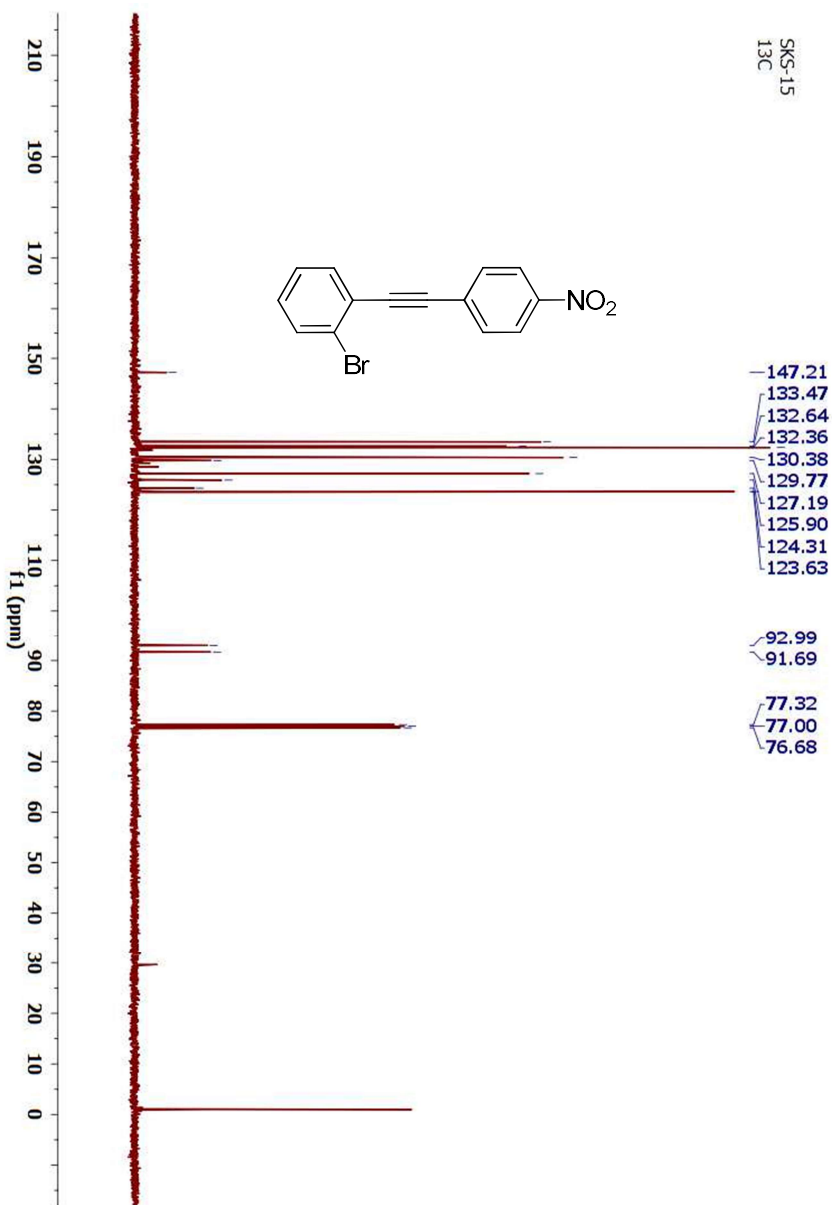

SS-223-1H

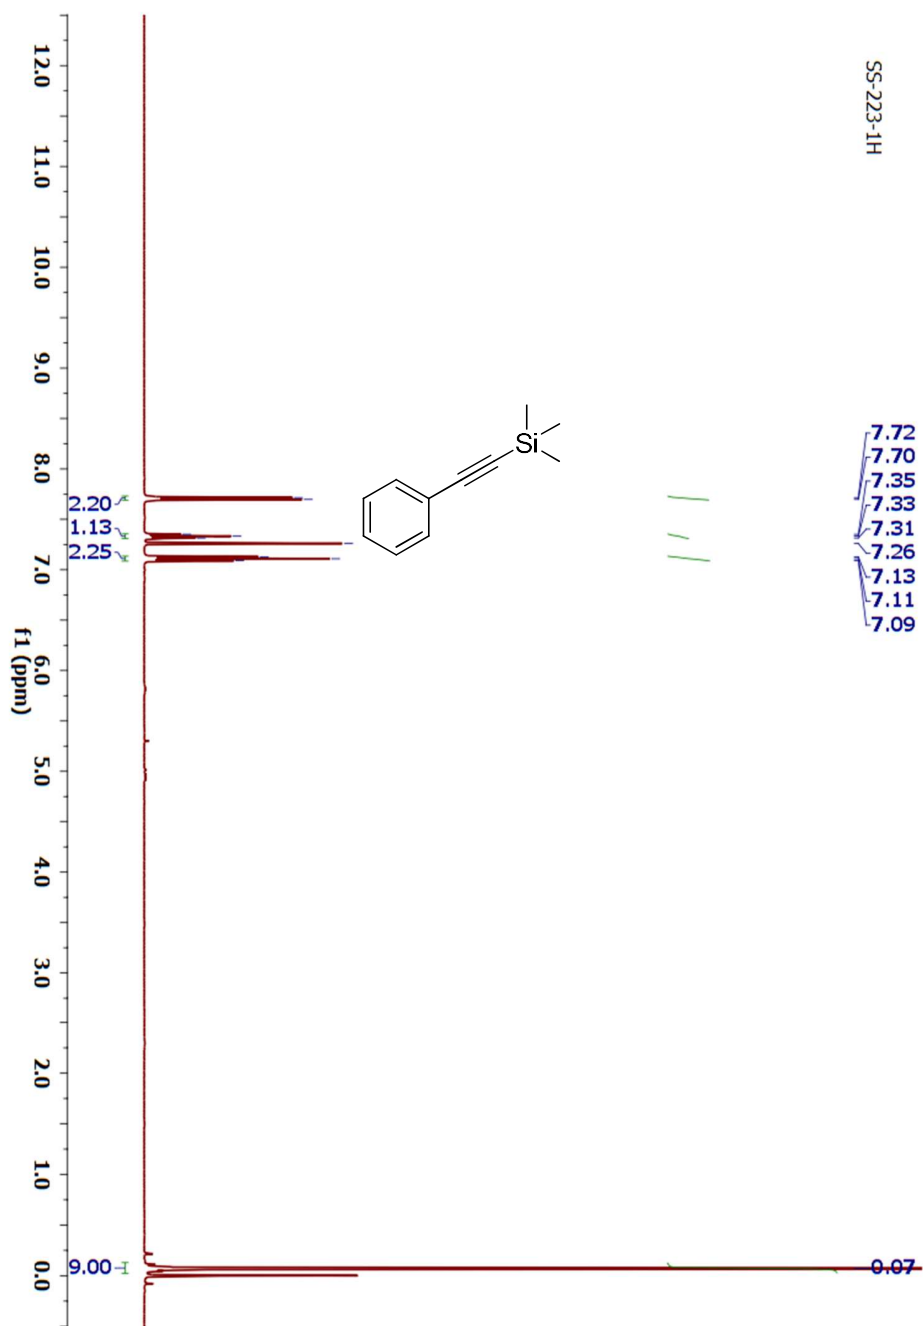

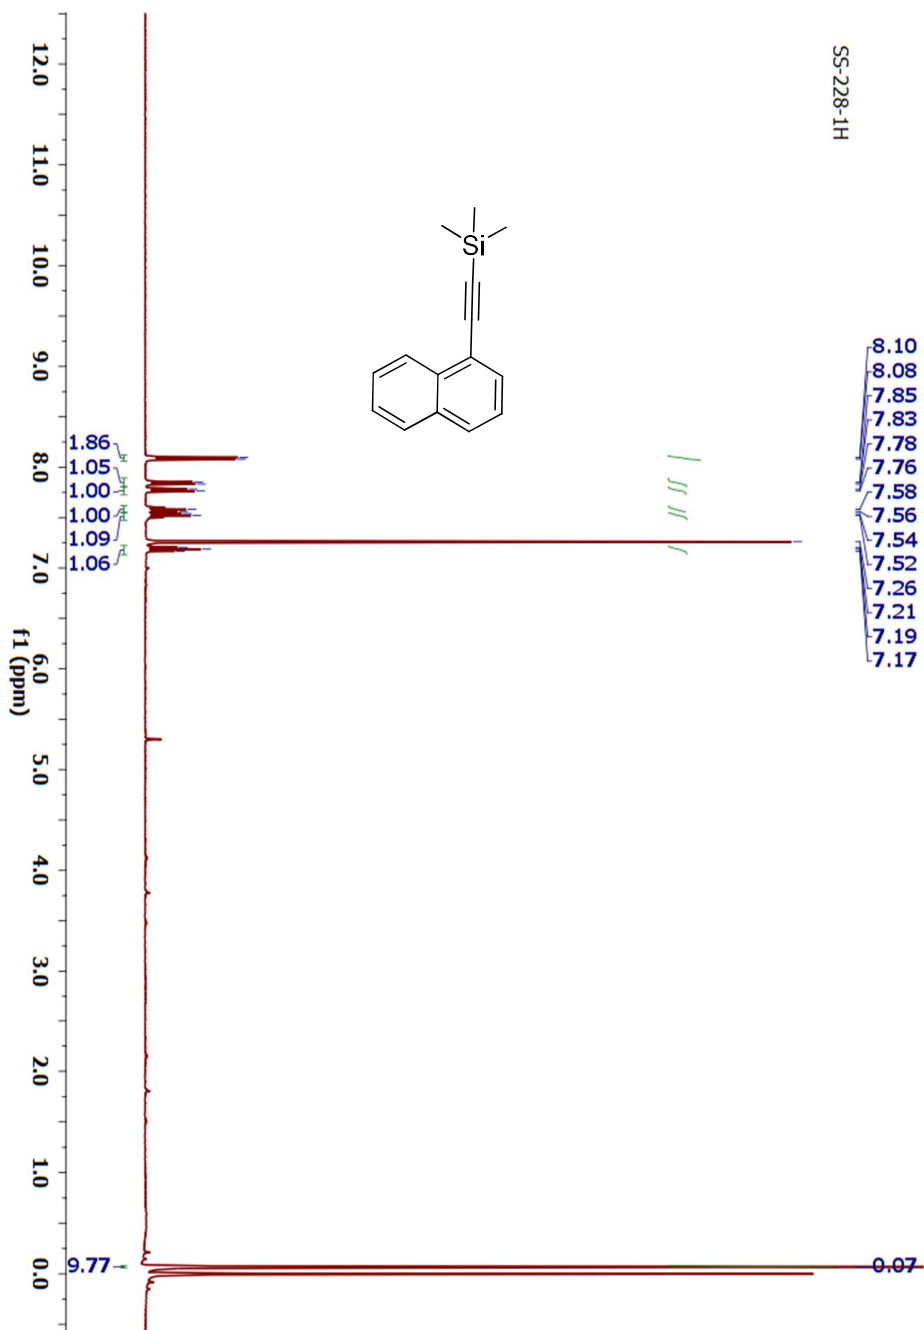

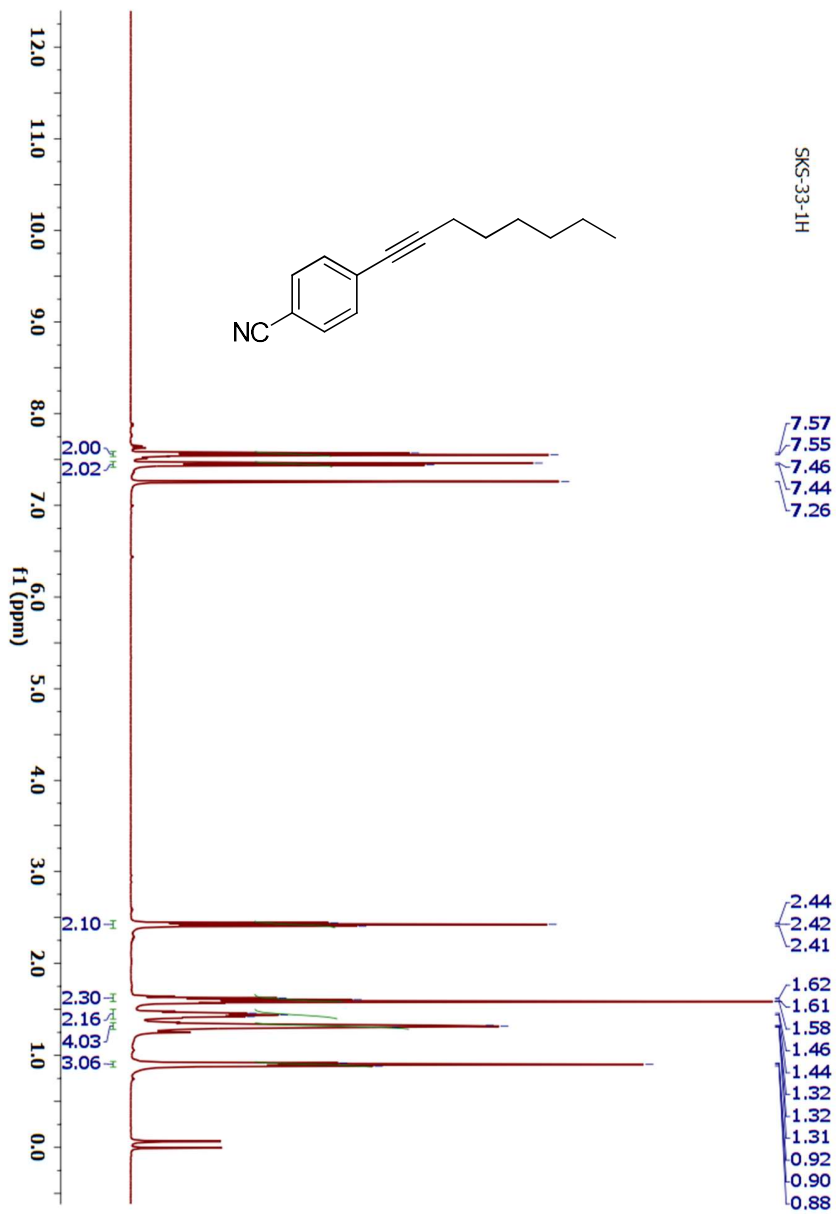



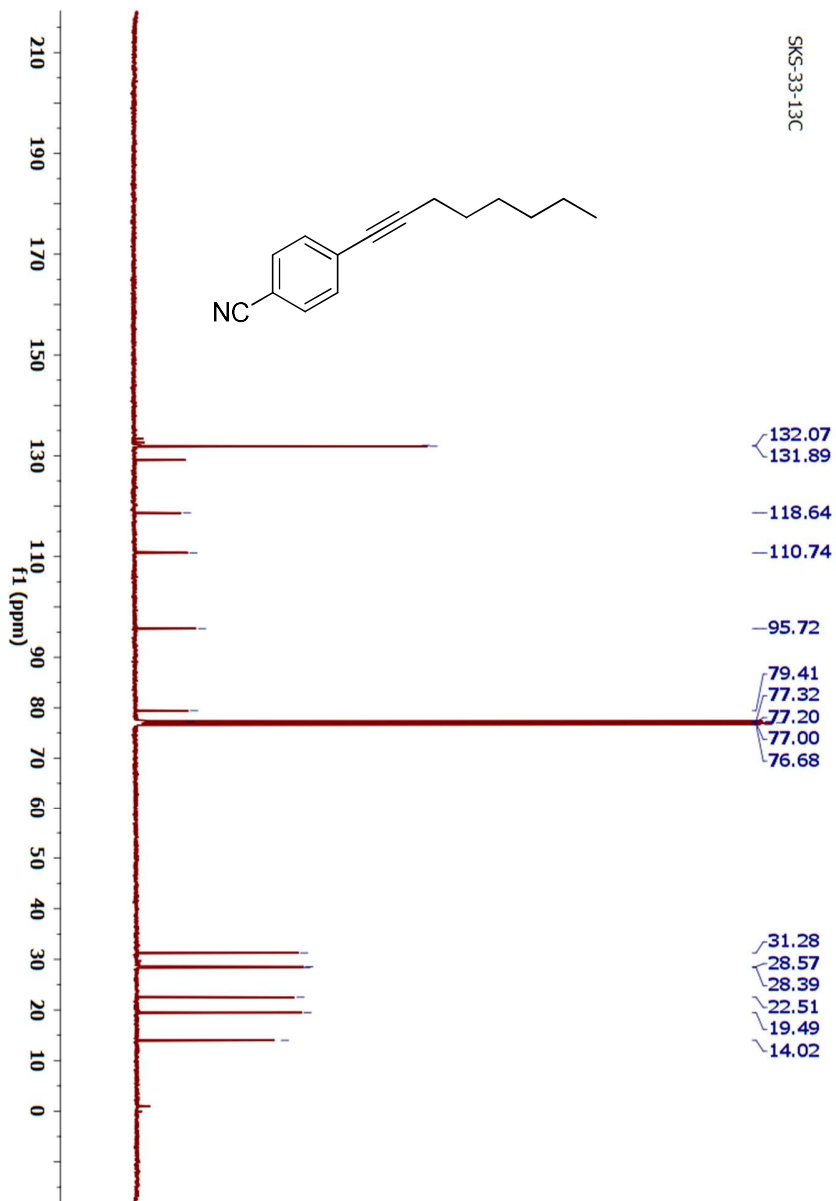

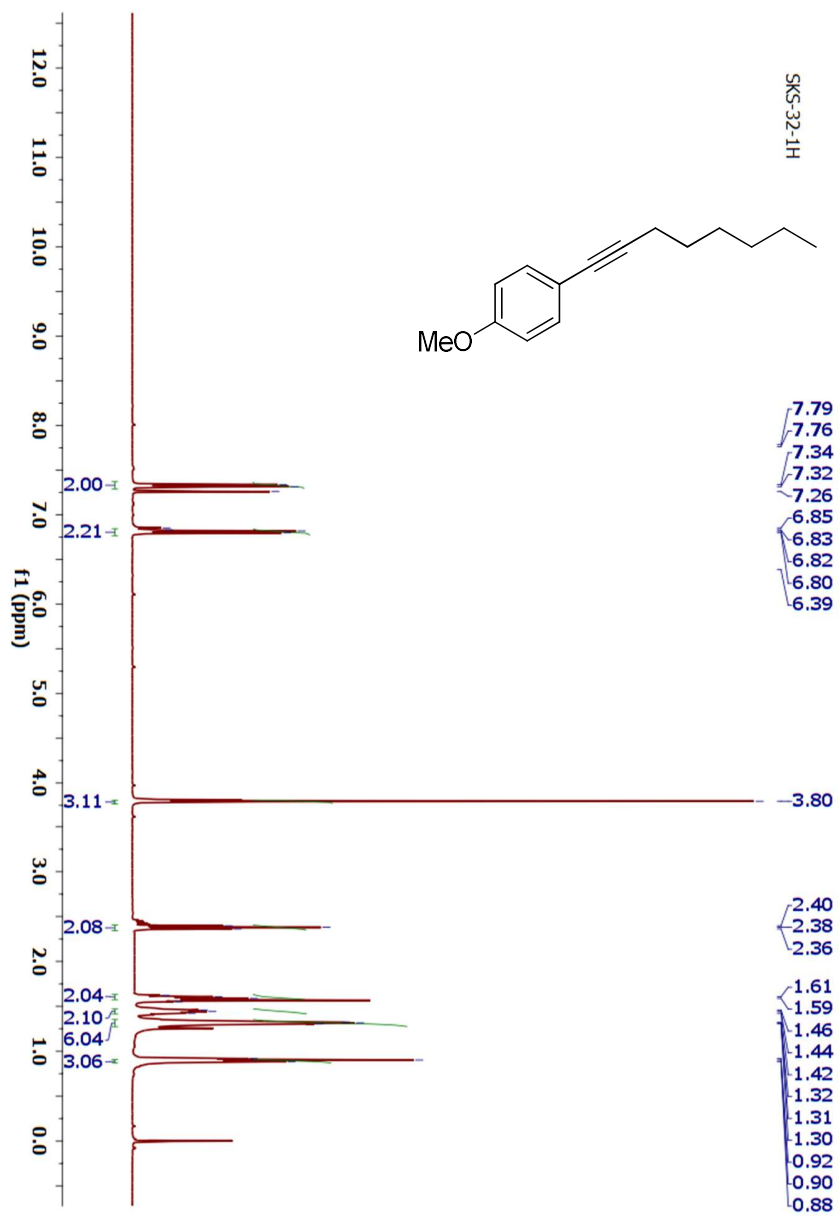

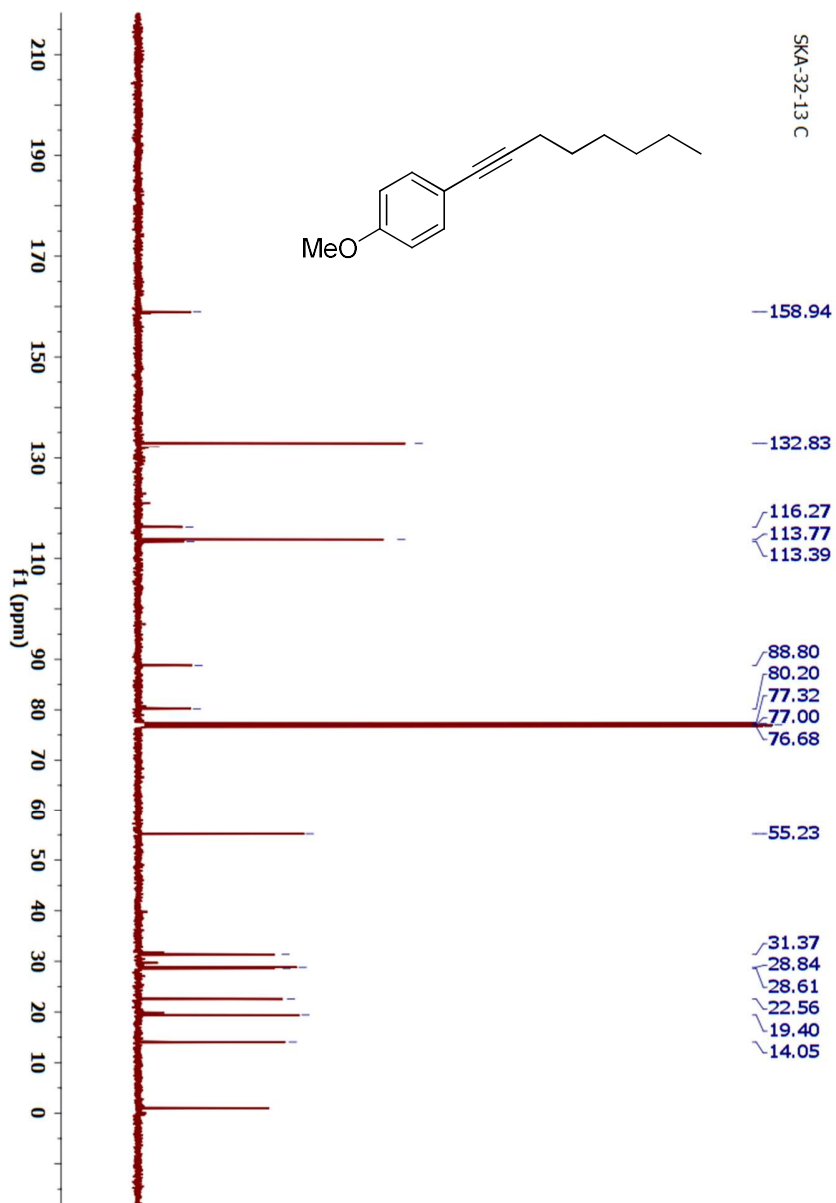

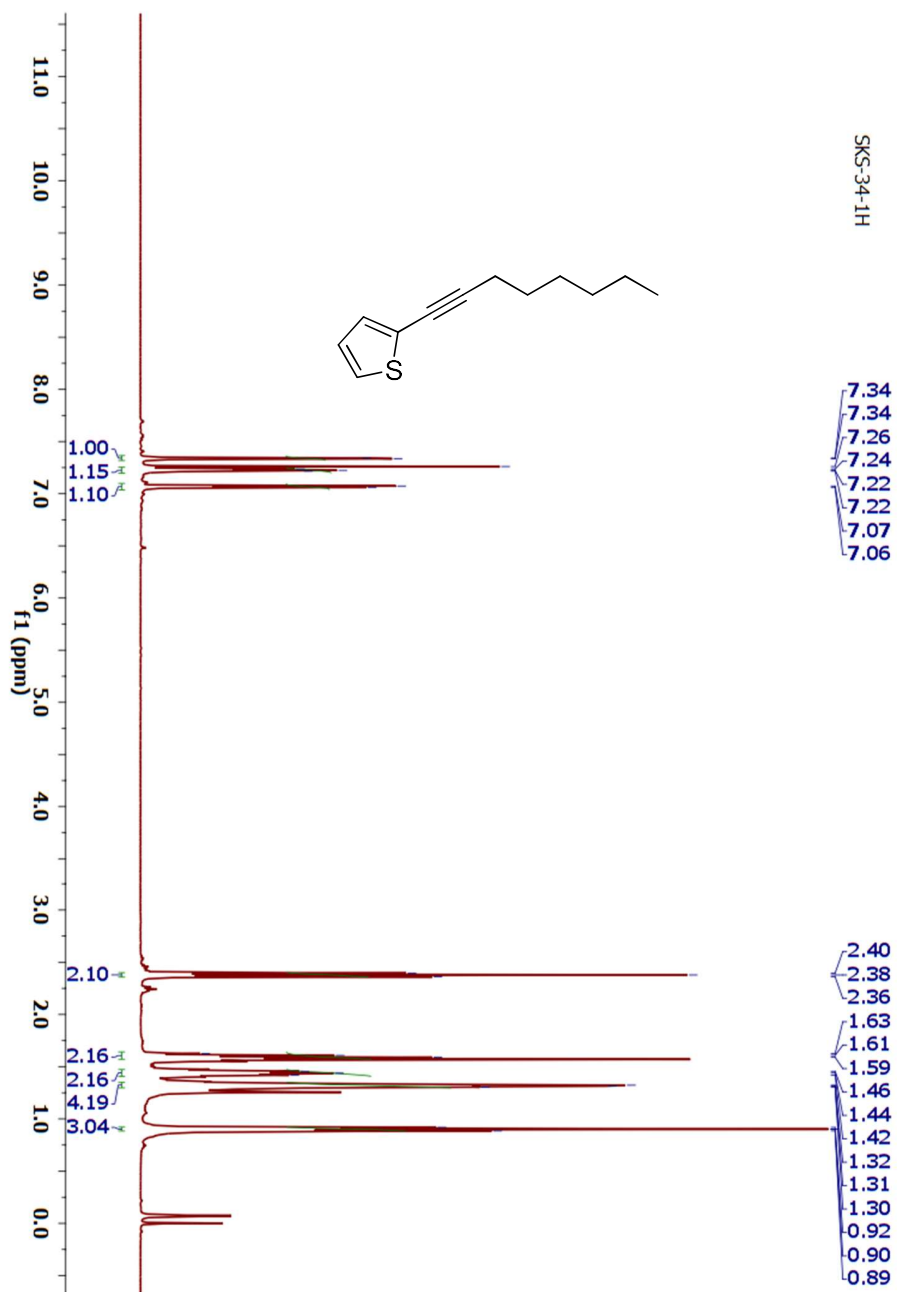

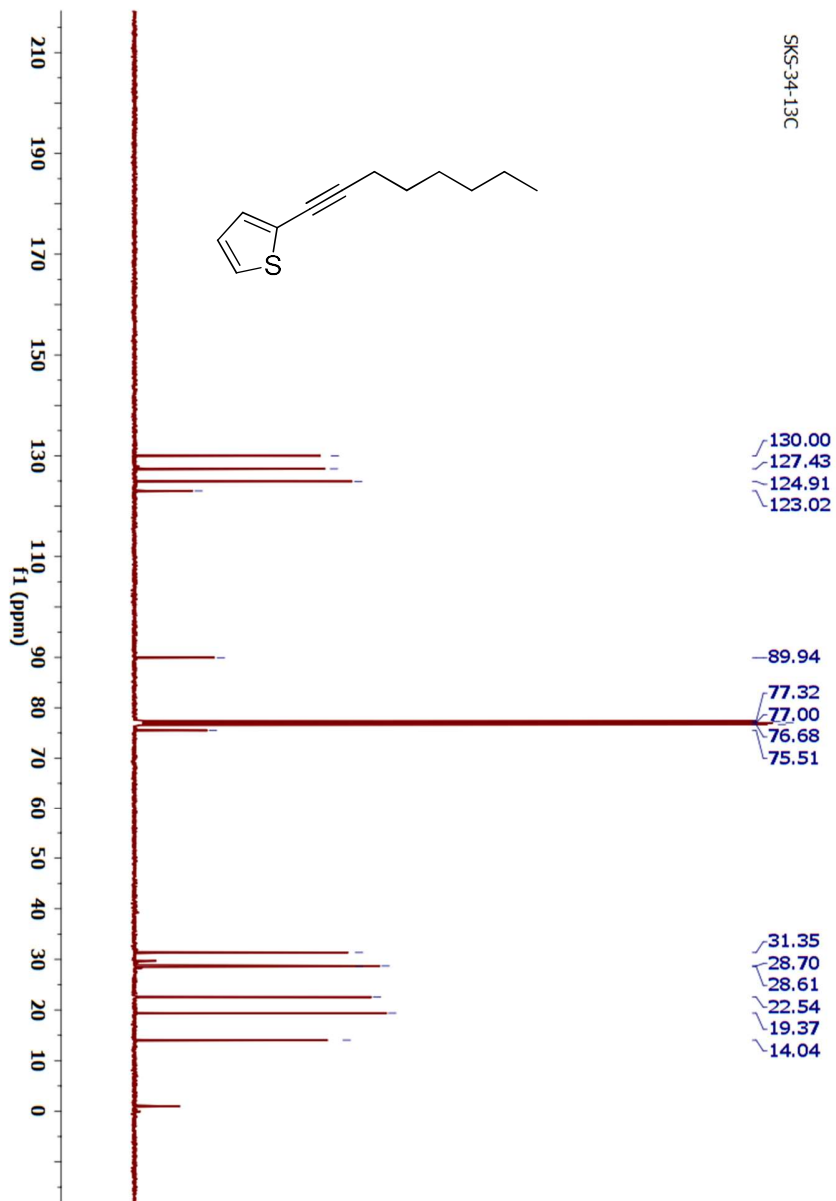

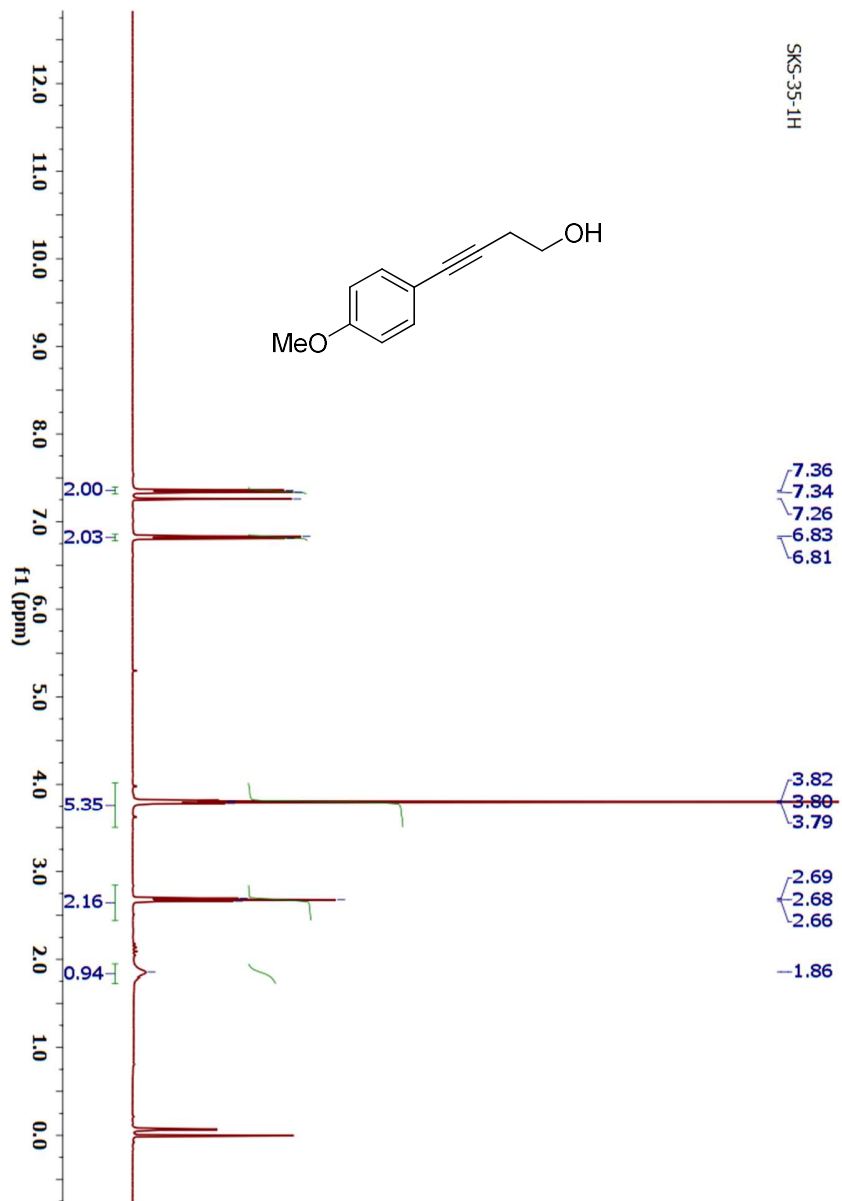

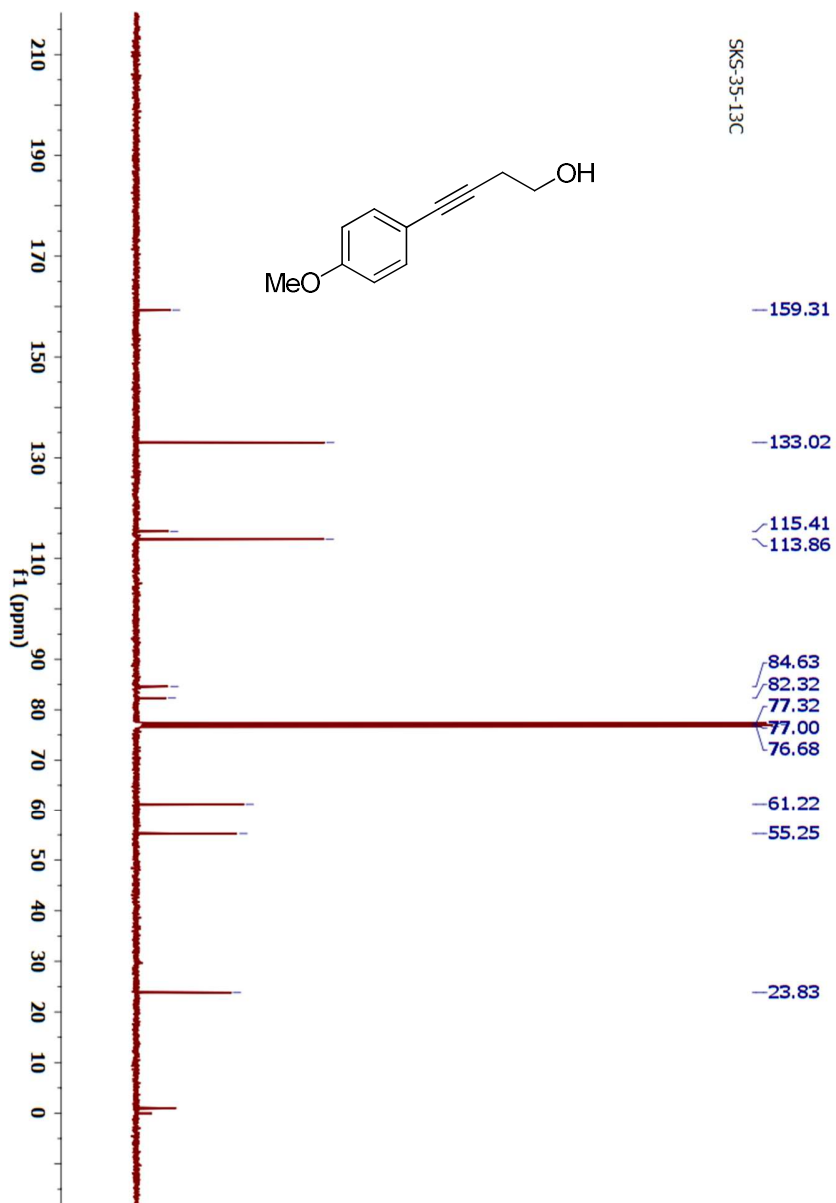

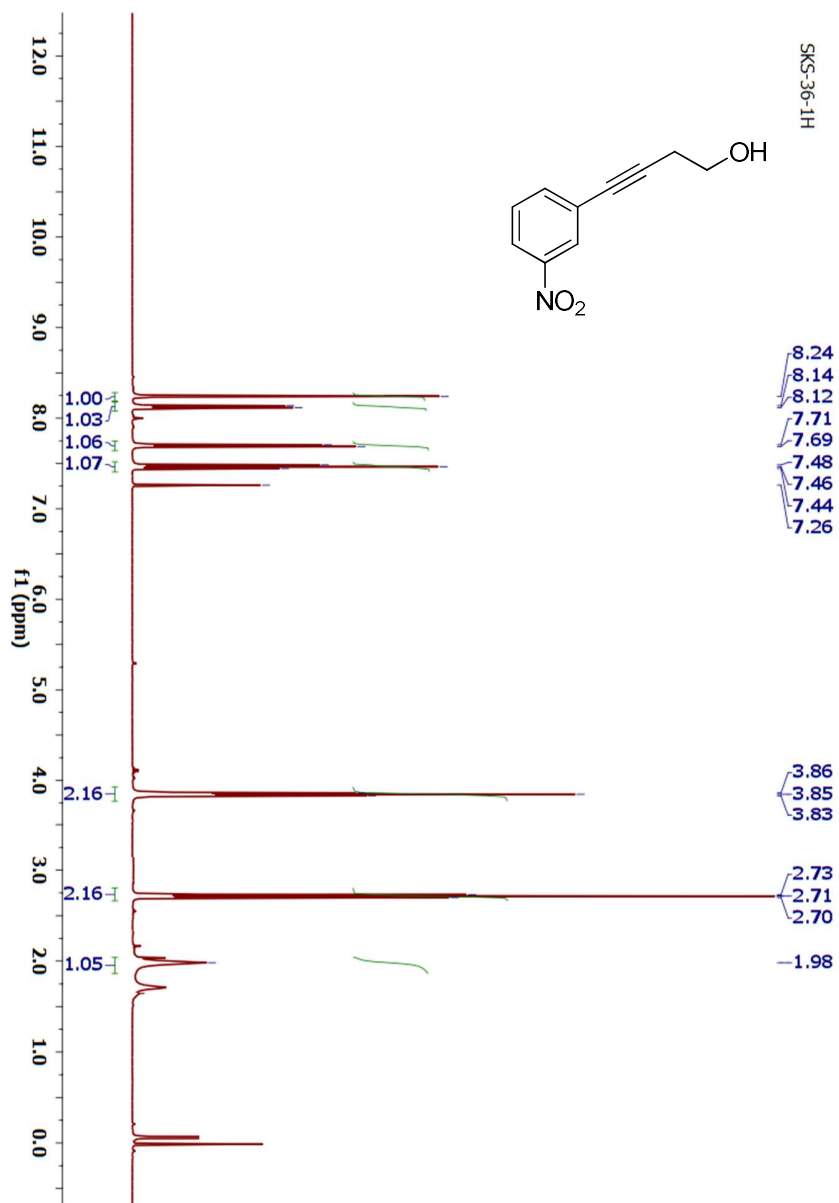



SK5-36-13C

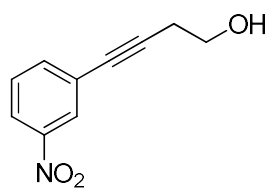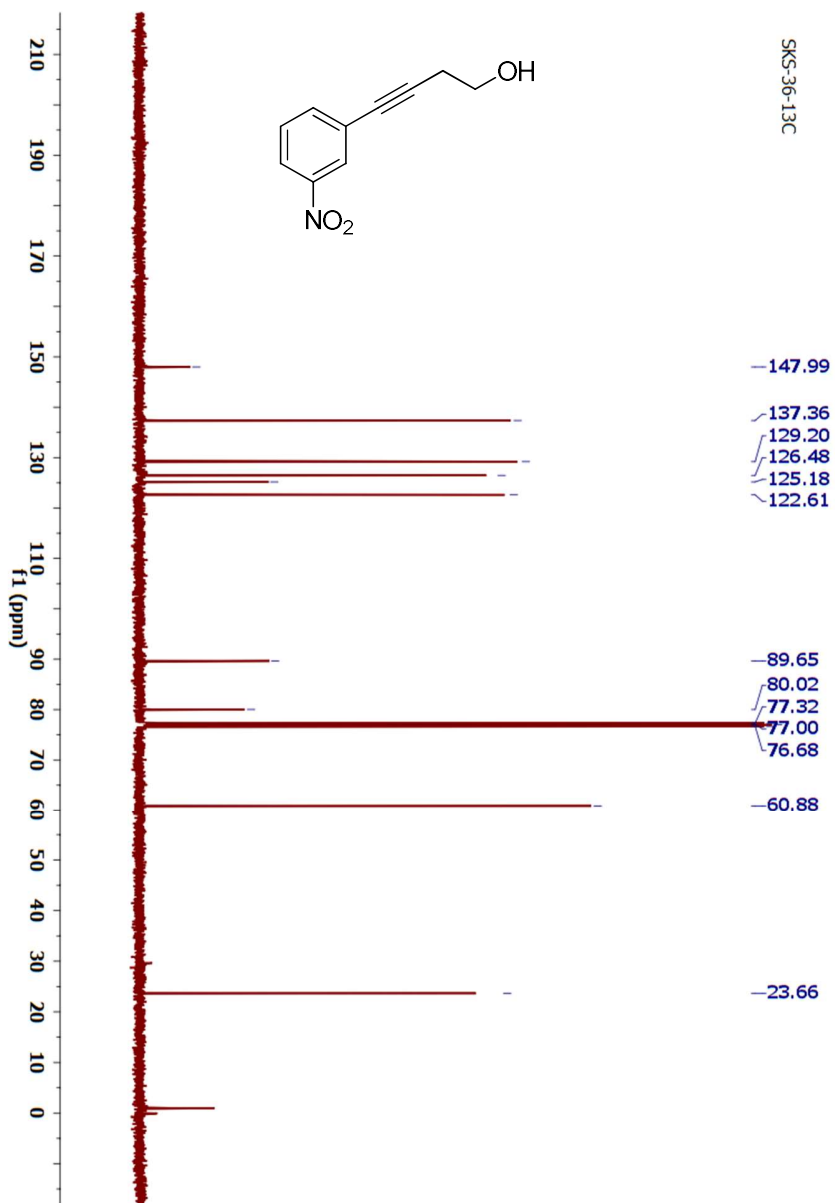

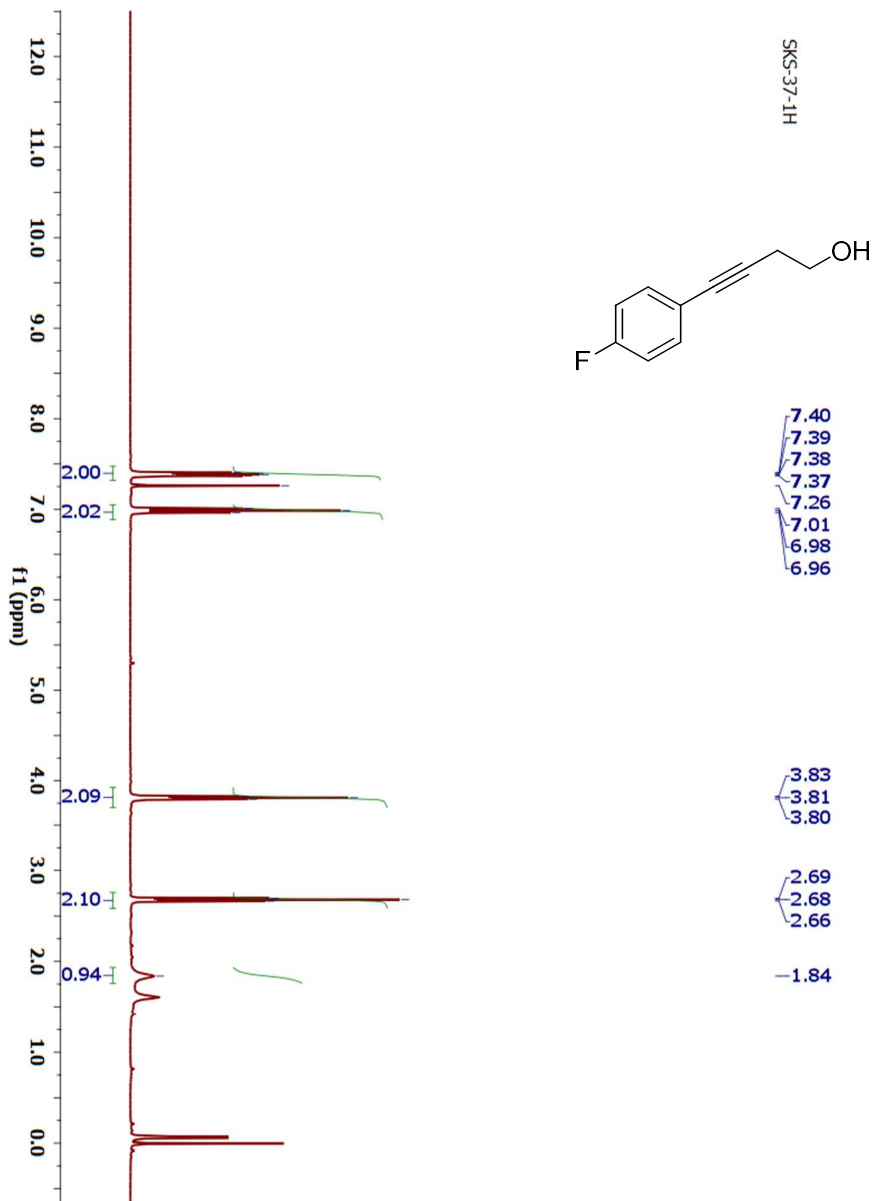

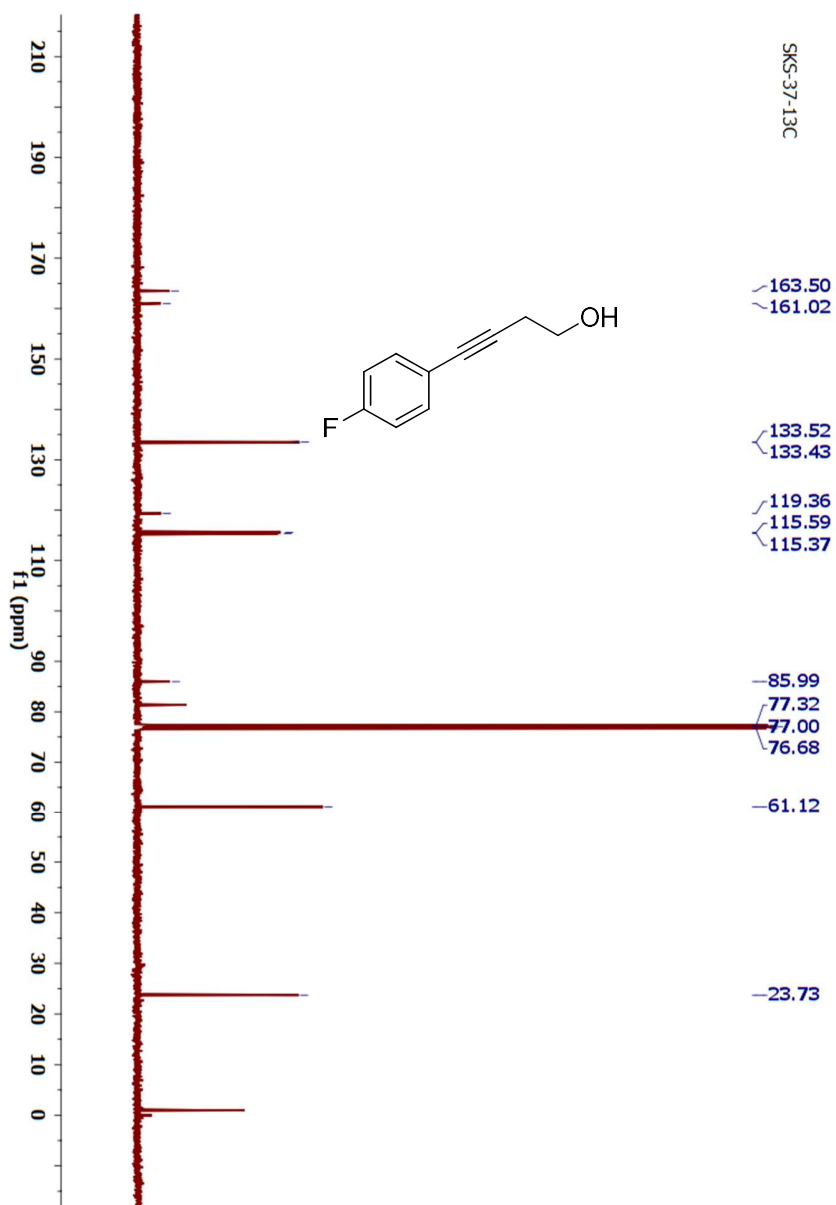

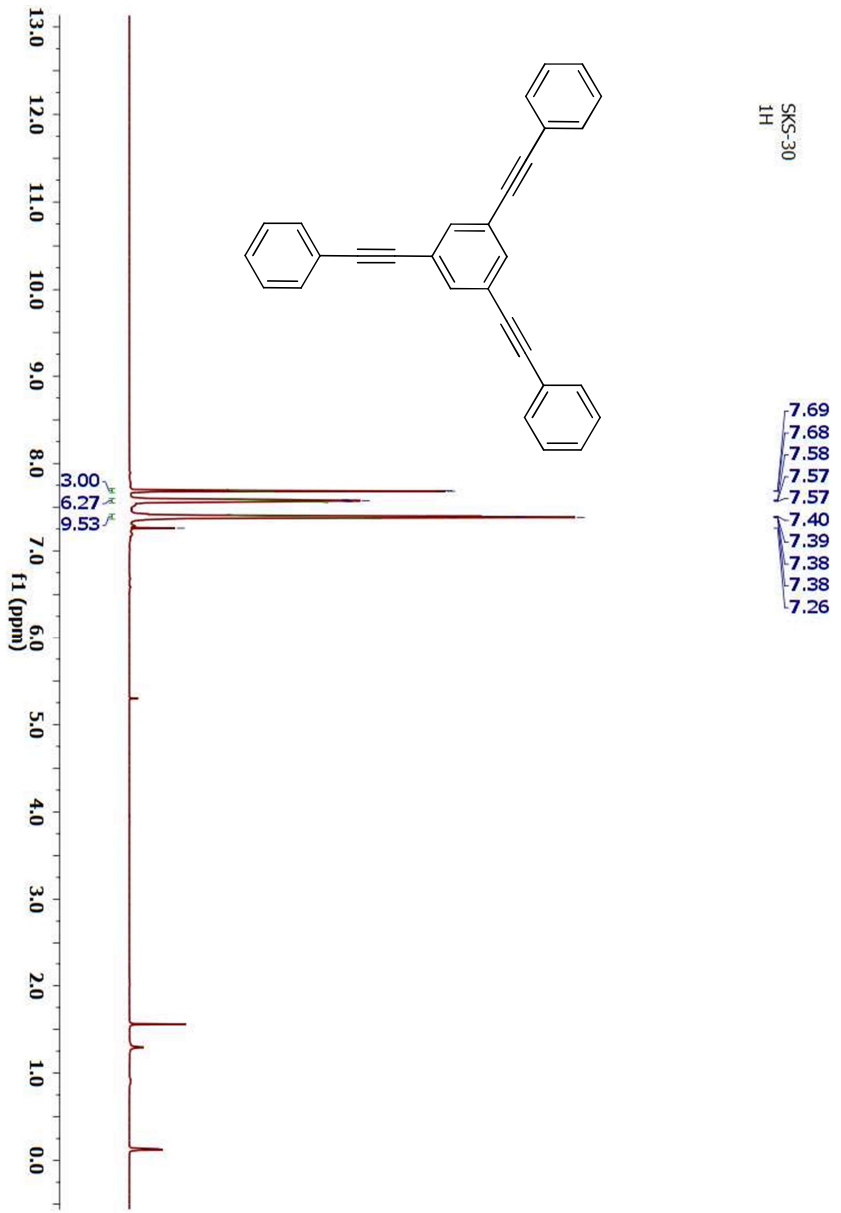

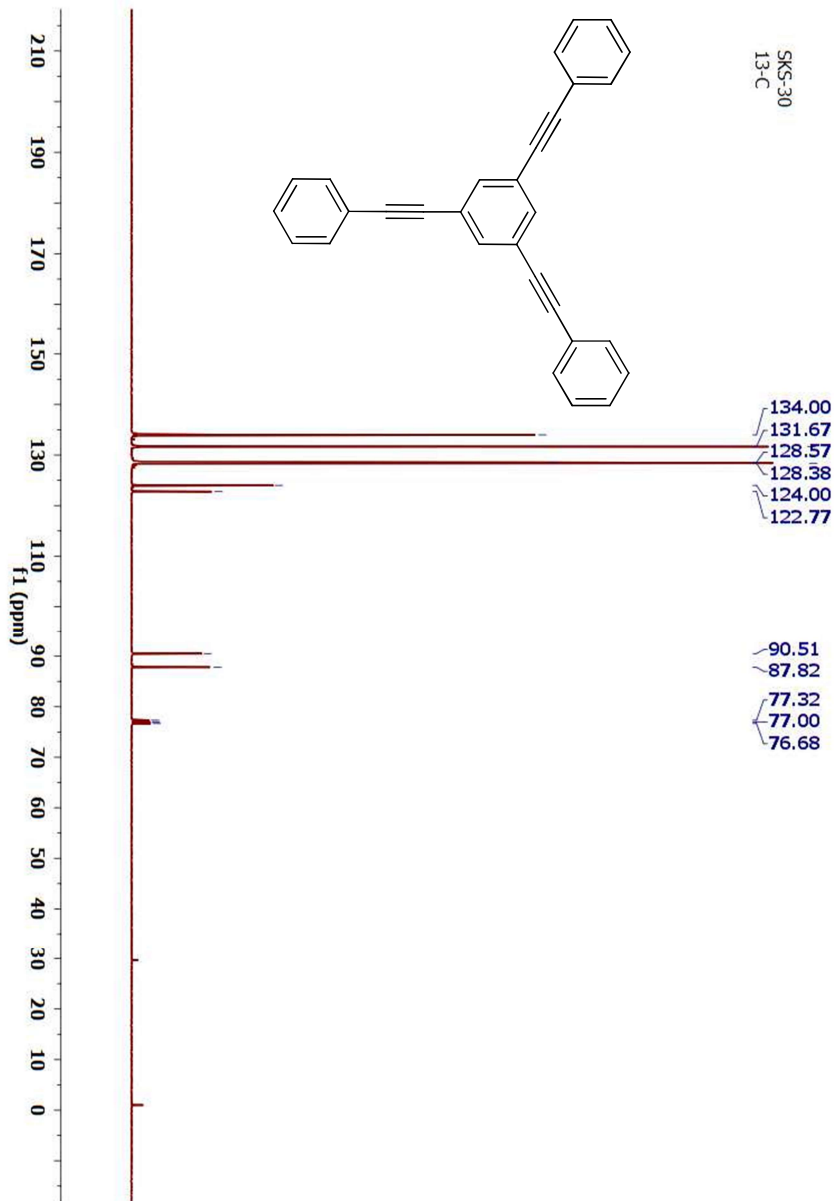

Supplement: d1nj04485k1.pdf [file d1nj04485k1.pdf]
